## Supplementary materials

### eMethods. Supplemental Methods

**eTable 1. Raw data of clinical characteristics and laboratory results from included studies in Wuhan**

**eTable 2. Raw data of clinical characteristics and laboratory results from included studies outside Wuhan (including the two nationwide studies)**

**eFigure 1. Flow chart of studies selection**

**eFigure 2. Forest plot of CSR and CFR**

**eFigure 3. Meta-regression data for CSR and CFR using comprehensive meta-analysis software**

**eFigure 4. Forest plots of clinical and baseline characteristics**

**eFigure 5. Estimated risk of medical conditions for severity of COVID-19 (A. Mean Difference [MD] in age between severe and non-severe cases)**

**eFigure 6. Estimated risk of abnormal laboratory index for severity of COVID-19**

**eFigure 7. MD in laboratory index between severe and non-severe cases of COVID-19**

**eFigure 8. Forest plot showing result of sensitive analysis after excluding 1 study in turn**

**eFigure 9. Funnel plot**

**eReferences.**

### eMethods Supplemental Methods

#### Definition

##### 1. Laboratory-confirmed case

Laboratory-confirmed case was defined as the presence of SARS-CoV-2 in respiratory specimens (including nasal and pharyngeal swabs) detected by the reverse-transcriptase polymerase chain reaction (RT-PCR), which was conducted in accordance with the protocol established by the World Health Organization.<sup>1</sup> Practice of the diagnostic criteria was based on the recommendation by the National Institute for Viral Disease Control and Prevention of CDC (Available at [http://ivdc.chinacdc.cn/kyjz/202001/t20200121\\_211337.html](http://ivdc.chinacdc.cn/kyjz/202001/t20200121_211337.html)).

##### 2. Severe disease

Severe disease was defined as meeting one of the following criteria: 1) presence of shortness of breath with a respiratory rate  $\geq 30$  breaths/minute; 2) an oxygen saturation (SpO<sub>2</sub>)  $\leq 93\%$  in the resting state; 3) hypoxemia defined as an arterial partial pressure of oxygen divided by the fraction of inspired oxygen (PaO<sub>2</sub>/FiO<sub>2</sub> ratio)  $\leq 300$  mmHg; 4) presence of radiographic progression, defined as  $\geq 50\%$  increase of target lesion within 24-48 hours. The criterion was based on the Chinese COVID-19 prevention and control program (6th edition, <http://www.nhc.gov.cn/yzygj/s7653p/202002/8334a8326dd94d329df351d7da8aefc2.shtml>, accessed Feb 18, 2020) and American Thoracic Society guideline<sup>2</sup>.

**Search Strategies:**

Search strategy for PubMed (Feb 25, 2020)

| #  | Searches                                                                                                                                                                                                                                                                                                                                                                                                  | Results |
|----|-----------------------------------------------------------------------------------------------------------------------------------------------------------------------------------------------------------------------------------------------------------------------------------------------------------------------------------------------------------------------------------------------------------|---------|
| #1 | (((((virus*[Title] OR coronavirus[Title] OR nCoV[Title] OR infectious[Title] OR HCoV[Title] OR novel[Title])) AND (Wuhan[Title] OR China[Title] OR Chinese[Title] OR 2019[Title] OR 19[Title])) OR (COVID*[Title] OR SARS-Cov-2[Title] OR NCP*[Title])))                                                                                                                                                  | 725     |
| 2# | "Coronavirus"[Mesh]                                                                                                                                                                                                                                                                                                                                                                                       | 34      |
| 3# | #1 OR #2                                                                                                                                                                                                                                                                                                                                                                                                  | 747     |
| 4# | (clinical[Title/Abstract] OR death[Title/Abstract] OR laboratory[Title/Abstract] OR demographic*[Title/Abstract] OR baseline[Title/Abstract] OR sever*[Title/Abstract] OR outcome*[Title/Abstract] OR hospital*[Title/Abstract] OR epidemiolog*[Title/Abstract] OR ICU[Title/Abstract] OR intensive care[Title/Abstract] OR CFR[Title/Abstract] OR fatalit*[Title/Abstract] OR mortalit*[Title/Abstract]) | 155824  |
| 5# | #3 AND #4                                                                                                                                                                                                                                                                                                                                                                                                 | 331     |

Search strategy for Web of Science (Feb 25, 2020)

| #  | Searches                                                                                                                                                     | Results |
|----|--------------------------------------------------------------------------------------------------------------------------------------------------------------|---------|
| 1# | Topic: (covid-19)<br>Databases=SCI-EXPANDED, SSCI, A&HCI, CPCI-S, CPCI-SSH, ESCI, CCR-EXPANDED, IC Timespan=2019-2020                                        | 11      |
| 2# | Topic: (severe acute respiratory syndrome coronavirus 2)<br>Databases=SCI-EXPANDED, SSCI, A&HCI, CPCI-S, CPCI-SSH, ESCI, CCR-EXPANDED, IC Timespan=2019-2020 | 32      |
| 3# | Topic: (wuhan coronavirus)<br>Databases=SCI-EXPANDED, SSCI, A&HCI, CPCI-S, CPCI-SSH, ESCI, CCR-EXPANDED, IC Timespan=2019-2020                               | 43      |
| 4# | Topic: (wuhan seafood market pneumonia virus)<br>Databases=SCI-EXPANDED, SSCI, A&HCI, CPCI-S, CPCI-SSH, ESCI, CCR-EXPANDED, IC Timespan=2019-2020            | 4       |
| 5# | Topic: (covid-19 virus)<br>Databases=SCI-EXPANDED, SSCI, A&HCI, CPCI-S, CPCI-SSH, ESCI, CCR-EXPANDED, IC Timespan=2019-2020                                  | 1       |
| 6# | Topic: (coronavirus disease 2019 virus)<br>Databases=SCI-EXPANDED, SSCI, A&HCI, CPCI-S, CPCI-SSH, ESCI, CCR-EXPANDED, IC Timespan=2019-2020                  | 26      |
| 7# | Topic: (sars-cov-2)<br>Databases=SCI-EXPANDED, SSCI, A&HCI, CPCI-S, CPCI-SSH, ESCI, CCR-EXPANDED, IC Timespan=2019-2020                                      | 4       |
| 8# | Topic: (sars2)<br>Databases=SCI-EXPANDED, SSCI, A&HCI, CPCI-S, CPCI-SSH, ESCI, CCR-EXPANDED, IC Timespan=2019-2020                                           | 1       |

|     |                                                                                                                                                               |     |
|-----|---------------------------------------------------------------------------------------------------------------------------------------------------------------|-----|
| 9#  | Topic: (2019-ncov)<br>Databases=SCI-EXPANDED, SSCI, A&HCI, CPCI-S, CPCI-SSH, ESCI, CCR-EXPANDED, IC Timespan=2019-2020                                        | 61  |
| 10# | Topic: (2019 novel coronavirus)<br>Databases=SCI-EXPANDED, SSCI, A&HCI, CPCI-S, CPCI-SSH, ESCI, CCR-EXPANDED, IC Timespan=2019-2020                           | 54  |
| 11# | #10 OR #9 OR #8 OR #7 OR #6 OR #5 OR #4 OR #3 OR #2 OR #1<br>Databases=SCI-EXPANDED, SSCI, A&HCI, CPCI-S, CPCI-SSH, ESCI, CCR-EXPANDED, IC Timespan=2019-2020 | 132 |

Search strategy for Cochrane (Feb 25, 2020)

| #  | Search                                                                                                                                      | Results |
|----|---------------------------------------------------------------------------------------------------------------------------------------------|---------|
| 1# | MeSH descriptor: [Coronavirus] explode all trees                                                                                            | 11      |
| 2# | (COVID OR coronavirus OR NCP* OR nCoV OR SARS-CoA OR HCoV OR virus*):ti,ab,kw AND (clinical AND Wuhan) (Word variations have been searched) | 46      |
| 3# | #1 OR #2 Year first published Custom range 2019 to 2020                                                                                     | 8       |

Search strategy for Embase (Feb 25, 2020)

| #   | Searches                                                                       | Results |
|-----|--------------------------------------------------------------------------------|---------|
| 1#  | 'severe acute respiratory syndrome coronavirus 2'                              | 3       |
| 2#  | 'wuhan coronavirus'                                                            | 4       |
| 3#  | 'wuhan seafood market pneumonia virus'                                         | 0       |
| 4#  | 'covid19 virus'                                                                | 0       |
| 5#  | 'covid-19 virus'                                                               | 0       |
| 6#  | 'coronavirus disease 2019 virus'                                               | 0       |
| 7#  | 'sars-cov-2'                                                                   | 9       |
| 8#  | 'sars2'                                                                        | 14      |
| 9#  | '2019-ncov'                                                                    | 99      |
| 10# | '2019 novel coronavirus'/exp OR '2019 novel coronavirus'                       | 76      |
| 11# | (#1 OR #2 OR #3 OR #4 OR #5 OR #6 OR #7 OR #8 OR #9 OR #10) AND [2019-2020]/py | 132     |

Search strategy for Medrxiv (Feb 25, 2020)

| #  | Searches                                                                                                                                                                       | Results |
|----|--------------------------------------------------------------------------------------------------------------------------------------------------------------------------------|---------|
| 1# | for abstract or title "coronavirus OR COVID OR NCP* OR nCoV OR Wuhan virus" (match any words) and full text or abstract or title "clinical OR Wuhan OR 2019" (match whole any) | 236     |

## **Quality assessment**

### **Quality Assessment Forms recommended by Agency for Healthcare Research and Quality (AHRQ) for cross-sectional study**

- 1) Define the source of information (survey, record review)
- 2) List inclusion and exclusion criteria for exposed and unexposed subjects (cases and controls) or refer to previous publications
- 3) Indicate time period used for identifying patients
- 4) Indicate whether or not subjects were consecutive if not population-based
- 5) Indicate if evaluators of subjective components of study were masked to other aspects of the status of the participants
- 6) Describe any assessments undertaken for quality assurance purposes (e.g., test/retest of primary outcome measurements)
- 7) Explain any patient exclusions from analysis
- 8) Describe how confounding was assessed and/or controlled.
- 9) If applicable, explain how missing data were handled in the analysis
- 10) Summarize patient response rates and completeness of data collection
- 11) Clarify what follow-up, if any, was expected and the percentage of patients for which incomplete data or follow-up was obtained

The methodological quality of the studies included was assessed using an 11-item checklist which was recommended by Agency for Healthcare Research and Quality (AHRQ). An item would be scored '0' if it was answered 'NO' or 'UNCLEAR'; if it was answered 'YES', then the item scored '1'. Article quality was assessed as follows: low quality = 0-3; moderate quality = 4-7; high quality = 8-11.

**eTable 1. Raw data of clinical characteristics and laboratory results from included studies in Wuhan.**

| Study/year                       | Chaolin Huang et al.  | Nanshan Chen et al. | Qun Li et al.       | Jing Liu et al.  | Guang Chen Dawei Wang et al. | Yanli Liu et al. | Jinjin Zhang et al. | Jiatao Lu et al. | Qilin Li et al. | Yichun Cheng et al. | Luwen Wang et al. |                |
|----------------------------------|-----------------------|---------------------|---------------------|------------------|------------------------------|------------------|---------------------|------------------|-----------------|---------------------|-------------------|----------------|
| Period of study                  | 2019.12.06 - 2020.1.2 | 2020.1.1-1.20       | 2019.12.10-2020.1.4 | 2020.01.05-01.24 | 2019.12.19-2020.1.27         | 2020.1.1-1.28    | 2020.1.2-2.1        | 2020.1.16-2.3    | 2020.1.21-2.5   | 2020.2.3-2.7        | 2020.1.28-2.11    | 2020.1.14-2.13 |
| Location                         | Wuhan                 | Wuhan               | Wuhan               | Wuhan            | Wuhan                        | Wuhan            | Wuhan               | Wuhan            | Wuhan           | Wuhan               | Wuhan             | Wuhan          |
| N                                | 41                    | 99                  | 425                 | 40               | 21                           | 138              | 109                 | 140              | 75              | 52                  | 710               | 116            |
| Case fatality rate, n (%)        | 6 (15)                | 11 (11)             | NA                  | 2 (5.0)          | 4 (19.0)                     | 6/ (4.3)         | 31 (28.4)           | NA               | 1/ (1.3)        | NA                  | 89 (12.5)         | 7 (6.0)        |
| Severe cases, n (%)              | NA                    | NA                  | NA                  | 13 (32.5)        | 11 (52.4)                    | NA               | NA                  | 58 (41.4)        | 15/72 (20.8)    | NA                  | 252 (35.5)        | 46 (39.7)      |
| Age, y, mean (sd)/median (IQR)   | 49 (5.2)              | 55.5 (13.1)         | 59 (12.3)           | 48.7 (13.9)      | 56.3 (14.3)                  | 56 (11.7)        | 55 (43-66)          | 57 (25-87)       | 62 (48-71)      | 57 (49-69)          | 63 (51-71)        | 54 (38-69)     |
| Male, n (%)                      | 30 (73)               | 67 (68)             | 238 (56)            | 15 (37.5)        | 17 (81.0)                    | 75/ (54.3)       | 59 (54.1)           | 71 (50.7)        | 37 (49.3)       | 26 (50.0)           | 374 (52.7)        | 67 (57.8)      |
| Current smoking, n (%)           | 3(7)                  | NA                  | NA                  | NA               | NA                           | NA               | NA                  | 2 (1.4)          | NA              | NA                  | NA                | NA             |
| Healthcare worker, n (%)         | NA                    | NA                  | 15 (3.5)            | NA               | NA                           | 40 (29.0)        | NA                  | 3 (2.1)          | NA              | NA                  | NA                | NA             |
| Any comorbidity, n (%)           | 13 (32)               | 50 (51)             | NA                  | 14 (35.0)        | 7 (33.3)                     | 64 (46.7)        | NA                  | 90 (64.3)        | NA              | NA                  | NA                | 51 (43.9)      |
| Specific comorbidity, n (%)      |                       |                     |                     |                  |                              |                  |                     |                  |                 |                     |                   |                |
| Hypertension                     | 6 (14.6)              | 0                   | NA                  | 6 (15.0)         | 5 (23.8)                     | 43 (31.2)        | 37 (33.9)           | 42 (30.0)        | 20/46 (43.5)    | NA                  | NA                | 43 (37.1)      |
| Diabetes                         | 8 (19.5)              | 12 (12.1)           | NA                  | 6 (15.0)         | 3 (14.3)                     | 14 (10.1)        | 12 (11.0)           | 17 (12.1)        | 3/46 (6.5)      | NA                  | NA                | 18 (15.5)      |
| Cardiovascular diseases          | 6 (14.6)              | 40 (40.4)           | NA                  | 0                | 0                            | 20 (14.5)        | 7 (6.4)             | 12 (8.6)         | 4/46 (8.7)      | NA                  | NA                | 0              |
| Cerebrovascular diseases         | 0                     |                     | NA                  | 0                | 0                            | 7 (5.1)          | 6 (5.5)             | 3 (2.1)          | 2/46 (4.3)      | NA                  | NA                | 7 (6.0)        |
| COPD                             | 1 (2.4)               | 1 (1.0)             | NA                  | 0                | 0                            | 4 (2.9)          | 4 (3.7)             | 2 (1.4)          | 0/46 (0)        | NA                  | NA                | 0              |
| Cancer                           | 1 (2.4)               | 0                   | NA                  | 4 (10.0)         | 0                            | 10 (7.2)         | 0                   | 0                | 0               | NA                  | NA                | 12 (10.3)      |
| Chronic renal diseases           | 0                     | 0                   | NA                  | 0                | 0                            | 4 (2.9)          | 10 (9.2)            | 2 (1.4)          | 0               | NA                  | NA                | 5 (4.3)        |
| Chronic liver disease            | 1 (2.4)               | 0                   | NA                  | 0                | 0                            | 4 (2.9)          | 0                   | 8 (5.7)          | 5/46 (10.9)     | NA                  | NA                | 0              |
| Digestive system diseases        | 0                     | 11 (11.1)           | NA                  | 0                | 0                            | 0                | 0                   | 7 (5.0)          | 0               | NA                  | NA                | 0              |
| Tuberculosis                     | 0                     | 0                   | NA                  | 0                | 0                            | 0                | 0                   | 2 (1.4)          | 0               | NA                  | NA                | 0              |
| Abnormal lipid metabolism        | 0                     | 0                   | NA                  | 0                | 0                            | 0                | 0                   | 7 (5.0)          | 0               | NA                  | NA                | 0              |
| Cholelithiasis                   | 0                     | 0                   | NA                  | 0                | 0                            | 0                | 0                   | 6 (4.3)          | 0               | NA                  | NA                | 0              |
| Thyroid disease                  | 0                     | 0                   | NA                  | 2 (5.0)          | 0                            | 0                | 0                   | 0                | 0               | NA                  | NA                | 0              |
| HIV infection                    | 0                     | 0                   | NA                  | 0                | 0                            | 2 (1.4)          | 0                   | 0                | 0               | NA                  | NA                | 0              |
| Symptom, n (%)                   |                       |                     |                     |                  |                              |                  |                     |                  |                 |                     |                   |                |
| Fever                            | 40 (98)               | 82 (83)             | NA                  | 36 (90.0)        | 20/20 (100)                  | 136 (98.6)       | 90 (82.6)           | 110/120 (91.7)   | 50/68 (73.5)    | 31/52 (59.6)        | 216/664 (32.5)    | NA             |
| Fatigue                          |                       |                     | NA                  | 22 (55.0)        | 17/20 (85.0)                 | 96(69.6)         | 62 (56.9)           | 90/120 (75.0)    | 29/68 (42.6)    | 1/52 (1.9)          | NA                | NA             |
| Myalgia                          | 18 (44)               | 11 (11)             | NA                  | 15 (37.5)        | 8/20 (40.0)                  | 48 (34.8)        |                     |                  | 2/68(2.9)       | NA                  | NA                | NA             |
| Headache                         | 3/38 (8)              | 8 (8)               | NA                  | 8/40 (20.0)      | 2/20 (10.0)                  | 9(6.5)           | 0                   | 0                | 6/68 (8.8)      | NA                  | NA                | NA             |
| Chill                            | 0                     | 0                   | NA                  | 15 (37.5)        | 0                            | 0                | 0                   | 0                | 0               | NA                  | NA                | NA             |
| Confusion/Dizziness              | 0                     | 9 (9)               | NA                  | 7 (17.5)         | 0                            | 13 (9.4)         | 0                   | 0                | 0               | NA                  | NA                | NA             |
| Coma                             | 0                     | 0                   | NA                  | 0                | 1/21 (4.8)                   | 0                | 0                   | 0                | 0               | NA                  | NA                | NA             |
| Dyspnea                          | 22/40 (55)            | 0                   | NA                  | 1 (2.5)          | 11/21 (52.4)                 | 43 (31.2)        | 0                   | 44/120 (36.7)    | 0               | NA                  | NA                | NA             |
| Mild shortness of breath         | 0                     | 31 (31)             | NA                  | 17 (42.5)        | 11/20 (55.0)                 | 0                | 0                   | 0                | 5/68 (7.4)      | NA                  | NA                | NA             |
| Cough                            | 31 (76)               | 81 (82)             | NA                  | 33 (82.5)        | 16/20 (80.0)                 | 82 (59.4)        | 67 (61.5)           | 90/120 (75.0)    | 44/68 (64.7)    | NA                  | NA                | NA             |
| Haemoptysis                      | 2/39 (5)              | 0                   | NA                  | 0                | 0                            | 0                | 0                   | 0                | 0               | NA                  | NA                | NA             |
| Sputum production /Expectoration | 11/39 (28)            | 0                   | NA                  | 21 (52.5)        | 5/20 (25.0)                  | 37 (26.8)        | 0                   | 0                | 0               | NA                  | NA                | NA             |
| Sore throat/Pharyngalgia         | 0                     | 5 (5)               | NA                  | 5 (12.5)         | 0                            | 24(17.4)         | 0                   | 0                | 3/68 (4.4)      | NA                  | NA                | NA             |
| Nasal congestion/ Rhinorrhoea    | 0                     | 4(4)                | NA                  | 1 (2.5)          | 0                            | 0                | 0                   | 0                | 1/68 (1.5)      | NA                  | NA                | NA             |
| Chest pain                       | 0                     | 2 (2)               | NA                  | 1 (2.5)          | 0                            | 0                | 7 (6.4)             | 0                | 0/68 (0)        | NA                  | NA                | NA             |
| Abdominal pain                   | 0                     | 0                   | NA                  | 1 (2.5)          | 0                            | 3 (2.2)          | 0                   | 8/139 (5.8)      | 0               | NA                  | NA                | NA             |

|                                                |                     |                     |    |                      |               |                  |                  |                  |                  |                     |           |    |
|------------------------------------------------|---------------------|---------------------|----|----------------------|---------------|------------------|------------------|------------------|------------------|---------------------|-----------|----|
| Anorexia                                       | 0                   | 0                   | NA | 0                    | 0             | 55 (39.9)        | 0                | 17/139 (12.2)    | 0                | NA                  | NA        | NA |
| Nausea                                         | 0                   | 1 (1)               | NA | 3 (7.5)              | 0             | 14 (10.1)        | 0                | 24/139 (17.3)    | 2/68 (2.9)       | NA                  | NA        | NA |
| Vomiting                                       | 0                   | 0                   | NA | 1 (2.5)              | 0             | 5 (3.6)          | 0                | 7/139 (5.0)      | 4/68 (5.9)       | NA                  | NA        | NA |
| Diarrhea                                       | 1/38 (3)            | 2 (2)               | NA | 3 (7.5)              | 4/20 (20.0)   | 14 (10.1)        | 12 (11.0)        | 118/139 (12.9)   | 5/68 (7.4)       | NA                  | NA        | NA |
| Laboratory findings, mean (sd)/median (IQR)    |                     |                     |    |                      |               |                  |                  |                  |                  |                     |           |    |
| WBC, × 10 <sup>9</sup> /L                      | 6.2 (4.1-10.5)      | 7.5 (3.6)           | NA | 4.8 (2.6)            | 7.0 (3.6)     | 4.5 (3.3-6.2)    | 5.2 (4.0-7.0)    | 4.7 (3.7-6.7)    | 4.9 (3.6-6.8)    | 5.84 (3.75-7.93)    | 7.5 (7.5) | NA |
| N, × 10 <sup>9</sup> /L                        | 5.0(3.3-8.9)        | 5.0 (3.3-8.1)       | NA | 2.8 (1.6-4.3)        | 5.7 (3.8)     | 3.0 (2.0-4.9)    | 3.6 (2.8-5.6)    | NA               | 3.7 (2.3-5.4)    | 3.98 (2.39-5.57)    | 0.9 (0.5) | NA |
| L, × 10 <sup>9</sup> /L                        | 0.8 (0.6-1.1)       | 0.9 (0.5)           | NA | 0.9 (0.7-1.3)        | 0.9 (0.4)     | 0.8 (0.6-1.1)    | 0.9 (0.5-1.2)    | 0.8 (0.6-1.1)    | 0.9 (0.6-1.2)    | 1.38 (0.66-2.09)    | NA        | NA |
| M, × 10 <sup>9</sup> /L                        | NA                  | NA                  | NA | 0.3 (0.2-0.5)        | NA            | 0.4 (0.3-0.5)    | NA               | NA               | NA               | 0.43 (0.21-0.64)    | NA        | NA |
| CRP, mg/L                                      | NA                  | 51.4 (41.8)         | NA | 38.1 (4.7-65.2)      | NA            | NA               | 31 (11-54)       | 34.2 (12.5-67.4) | 32.6 (11.6-39.0) | 23.6 (-6.9-54.1)    | NA        | NA |
| Hb, g/L                                        | 126.0 (118.0-140.0) | 129.8(14.8)         | NA | 126.4 (13.4)         | 137.0 (17.4)  | NA               | NA               | NA               | NA               | 140.8 (125.1-156.5) | 128 (18)  | NA |
| PLT, × 10 <sup>9</sup> /L                      | 164.5(131.5-263.0)  | 213.5(79.1)         | NA | 183.1 (69.0)         | 162.7 (45.0)  | 163 (123-191)    | NA               | NA               | NA               | 237.5 (135.2-335.9) | 212 (94)  | NA |
| PT, s                                          | 11.1 (10.1-12.4)    | 11.3(1.9)           | NA | 13.2 (0.6)           | 13.8 (1.0)    | 13.0 (12.3-13.7) | NA               | NA               | 14.2 (13.4-15.6) | NA                  | NA        | NA |
| Potassium, mmol/L                              | 4.2(3.8-4.8)        | NA                  | NA | 3.8 (0.5)            | NA            | NA               | NA               | NA               | NA               | NA                  | 4.2 (0.8) | NA |
| Sodium, mmol/L                                 | 139.0 (137.0-140.0) | NA                  | NA | 145.9 (43.4)         | NA            | NA               | NA               | NA               | NA               | NA                  | 139 (5)   | NA |
| Scr, µmol/L                                    | 74.2(57.5-85.7)     | 75.6 (25.0)         | NA | 67.3 (19.7)          | 82.4 (30.3)   | 72 (60-87)       | 62 (55-82)       | NA               | 67.0 (55.0-83.0) | NA                  | 83 (84)   | NA |
| CK, U/L                                        | 132.5 (62.0-219.0)  | 85.0 (51.0-184.0)   | NA | 59.5 (45.0-88.8)     | 153.7 (123.1) | 92 (56-130)      | 91 (52-178)      | 72.5 (52.2-115)  | NA               | NA                  | 165 (232) | NA |
| ALT, U/L                                       | 32.0(21.0-50.0)     | 39.0(22.0-53.0)     | NA | 22.5 (16.8-31.2)     | 30.0 (16.5)   | 24 (16-40)       | 23 (15-36)       | NA               | 23.0 (17.0-35.0) | NA                  | 36 (41)   | NA |
| Albumin, g/L                                   | 31.4 (28.9-36.0)    | 31.6 (4.0)          | NA | NA                   | 34.4 (5.7)    | NA               | NA               | NA               | 33.0 (30.3-37.3) | NA                  | NA        | NA |
| APTT, s                                        | 27(24.2-34.1)       | 27.3 (10.2)         | NA | 39.5 (4.5)           | 40.0 (6.5)    | 31.4 (29.4-33.5) | NA               | NA               | NA               | NA                  | NA        | NA |
| D-dimer, mg/L                                  | 0.5 (0.3-1.3)       | 0.9 (0.5-2.8)       | NA | 0.6 (0.3-0.9)        | 4.0 (7.0)     | 203 (121-403)    | 570 (300-1178)   | 5.2 (0.1-0.5)    | 0.4 (0.1-1.2)    | NA                  | NA        | NA |
| AST, U/L                                       | 34.0(26.0-48.0)     | 34.0 (26.0-48.0)    | NA | 34.1 (17.7)          | 38.2 (24.6)   | 31 (24-51)       | NA               | NA               | NA               | NA                  | 43 (50)   | NA |
| TBil, mmol/L                                   | 11.7 (9.5-13.9)     | 15.1 (7.3)          | NA | 10.3 (5.0)           | 9.8 (5.6)     | 9.8 (8.4-14.1)   | 9.0 (6.5-13.4)   | NA               | 9.2 (7.1-11.3)   | NA                  | 12 (23)   | NA |
| LDH, U/L                                       | 286.0(242.0-408.0)  | 336.0 (260.0-447.0) | NA | 303.9 (168.8)        | 408.1 (231.0) | 261 (182-403)    | 238 (185-341)    | NA               | NA               | NA                  | 378 (195) | NA |
| cTnI, pg/mL                                    | 3.4 (1.1-9.1)       | NA                  | NA | NA                   | NA            | 6.4 (2.8-18.5)   | NA               | NA               | NA               | NA                  | NA        | NA |
| PCT, ng/mL                                     | 0.1 (0.1-0.1)       | 0.5 (1.1)           | NA | NA                   | 0.3 (0.5)     | NA               | 0.09 (0.06-0.20) | 0.07 (0.04-0.1)  | NA               | NA                  | NA        | NA |
| BUN, mmol/L                                    | NA                  | 5.9 (2.6)           | NA | 3.2 (2.5-4.3)        | 6.1 (3.3)     | 4.4 (3.5-5.8)    | 4.3 (3.3-6.5)    | NA               | NA               | NA                  | 6.0 (5.0) | NA |
| Mb, ng/mL                                      | NA                  | 49.5 (33.2-99.8)    | NA | NA                   | NA            | NA               | NA               | NA               | NA               | NA                  | NA        | NA |
| IL-6, pg/mL                                    | NA                  | 7.9(6.1-10.6)       | NA | NA                   | NA            | NA               | NA               | NA               | NA               | NA                  | NA        | NA |
| ESR, mm/h                                      | NA                  | 49.9 (23.4)         | NA | NA                   | NA            | NA               | NA               | NA               | NA               | NA                  | NA        | NA |
| SF, ng/mL                                      | NA                  | 808.7 (490.7)       | NA | 596.5 (308.6-1087.6) | 1284.8 (934)  | NA               | NA               | NA               | NA               | NA                  | NA        | NA |
| Eosinophils, × 10 <sup>9</sup> /L              | NA                  | NA                  | NA | NA                   | NA            | NA               | NA               | 0.01 (0.0-0.05)  | NA               | 0.05 (-0.04-0.14)   | NA        | NA |
| CKMB, U/L                                      | NA                  | NA                  | NA | NA                   | NA            | 14 (10-18)       | 9.0 (6.1-14.8)   | NA               | NA               | NA                  | NA        | NA |
| Fibrinogen, g/L                                | NA                  | NA                  | NA | 5.1 (1.6)            | NA            | NA               | 3.1 (2.7-3.6)    | NA               | NA               | NA                  | NA        | NA |
| eGFR, ml/min/1.73m <sup>2</sup>                | NA                  | NA                  | NA | NA                   | NA            | NA               | NA               | NA               | NA               | NA                  | 86 (24)   | NA |
| Radiologic findings, n/N (%)                   |                     |                     |    |                      |               |                  |                  |                  |                  |                     |           |    |
| Bilateral lung involvement                     | 40 (98)             | NA                  | NA | NA                   | 17/21 (81.0)  | NA               | 100/109 (91.7)   | 121/135 (89.6)   | 42/44 (95.5)     | NA                  | NA        | NA |
| Timeline of illness, d, mean (sd)/median (IQR) |                     |                     |    |                      |               |                  |                  |                  |                  |                     |           |    |
| Days from illness onset to admission time      | 7 (4-8)             | NA                  | NA | NA                   | 6.4           | 7 (4-8)          | 7 (5-9)          | 8 (6-11)         | 6 (4.8)          | NA                  | 10 (7-13) | NA |

**eTable 2. Raw data of clinical characteristics and laboratory results from included studies outside Wuhan (including the two nationwide studies).**

| Study/year                     | Xiaowei Xu et al. | De Chang et al. | Jingyuan Liu et al. | Zhichao Feng et al. | Lei Liu et al. | Qingxian Cai et al. | Jinwei Ai et al. | Jingwen Ai et al. | Jie Li et al.   | Hongzhou Lu et al. | Yang yang et al.  | Weijie Guan et al.       |
|--------------------------------|-------------------|-----------------|---------------------|---------------------|----------------|---------------------|------------------|-------------------|-----------------|--------------------|-------------------|--------------------------|
| Period of study                | 2020.1.10-1.26    | 2020.1.16-1.29  | 2020.1.13-1.31      | 2020.1.17-2.1       | 2020.1.20-2.3  | 2020.1.11-2.6       | 2019.12-2020.2.9 | 2020.1.22-2.9     | 2020.1.22-2.10  | 2020.1.20-2.19     | 2019.12-2020.1.26 | 2019.12-2020.1.29        |
| Location                       | Zhejiang          | Beijing         | Beijing             | Hunan               | Chongqing      | Shenzhen            | Xiangyang, Hubei | Shanghai          | Dazhou, Sichuan | Shanghai           | Nationwide        | Nationwide               |
| N                              | 62                | 13              | 61                  | 141                 | 51             | 298                 | 102              | 20                | 17              | 265                | 4021              | 1099                     |
| Case fatality rate, n (%)      | 0 (0)             | 0 (0)           | 0 (0)               | NA                  | 1 (2.0)        | 0 (0)               | 3 (2.9)          | NA                | 0 (0)           | 1 (0.4)            | 58 (1.4)          | 15 (1.4)                 |
| Severe cases, n (%)            | NA                | NA              | 3 (4.9)             | 15 (10.6)           | 7 (13.7)       | 58 (19.4)           | NA               | 3 (15.0)          | NA              | 22 (8.3)           | 935 (25.5)        | 173 (15.7)               |
| Age, y, mean (sd)/median (IQR) | 41 (32-52)        | 34 (34-38)      | 40 (14.2)           | 44 (34-55)          | 45 (34-51)     | 47 (33-61)          | 50.38 (16.86)    | 37 (33.75-50.5)   | 45.1 (12.8)     | NA                 | 48 (16)           | 47 (3.8)                 |
| Male, n (%)                    | 36 (58.1)         | 10 (77)         | 31 (50.8)           | 72 (51.1)           | 32 (62.7)      | 149 (50.0)          | 52 (51.0)        | 10 (50.0)         | 9 (52.9)        | NA                 | 2213 (55.04)      | 649 (59.1)               |
| Current smoking, n (%)         | NA                | NA              | 4 (6.6)             | 7 (5.0)             | NA             | NA                  | NA               | NA                | 3 (17.6)        | NA                 | NA                | 137/1085(12.6)           |
| Healthcare worker, n (%)       | NA                | NA              | NA                  | NA                  | NA             | NA                  | NA               | NA                | NA              | NA                 | 247 (6.14)        | NA                       |
| Any comorbidity, n (%)         | 20 (32.3)         | NA              | NA                  | 33 (23.4)           | NA             | NA                  | 39 (38.2)        | NA                | 3 (17.6)        | NA                 | NA                | 255 (23.2)               |
| Specific comorbidity, n (%)    |                   |                 |                     |                     |                |                     |                  |                   |                 |                    |                   |                          |
| Hypertension                   | 5 (8.1)           | NA              | 12 (19.7)           | 21 (14.9)           | 4 (7.8)        | 38 (12.8)           | NA               | NA                | 1 (5.9)         | 52 (19.6)          | NA                | 164 (14.9)               |
| Diabetes                       | 1 (1.6)           | NA              | 5 (8.2)             | 8 (5.7)             | 4 (7.8)        | 19 (6.4)            | NA               | NA                | NA              | 21 (7.9)           | NA                | 81 (7.4)                 |
| Cardiovascular diseases        | NA                | NA              | 1 (1.6)             | 3 (2.1)             | NA             | 11 (3.7)            | NA               | NA                | NA              | 14 (5.3)           | NA                | 27 (2.5)                 |
| Cerebrovascular diseases       | 1 (1.6)           | NA              | NA                  | 1 (0.7)             | NA             | NA                  | NA               | NA                | NA              | 2 (0.08)           | NA                | 15 (1.4)                 |
| COPD                           | 1 (1.6)           | NA              | 5 (8.2)             | 4 (2.8)             | NA             | NA                  | NA               | NA                | NA              | 4 (1.5)            | NA                | 12 (1.1)                 |
| Cancer                         | NA                | NA              | NA                  | NA                  | NA             | 4 (1.4)             | NA               | NA                | NA              | 6 (2.3)            | NA                | 10 (0.9)                 |
| Chronic renal diseases         | 1 (1.6)           | NA              | NA                  | NA                  | NA             | NA                  | NA               | NA                | NA              | 5 (1.9)            | NA                | 8 (0.7)                  |
| Sinusitis                      | NA                | NA              | NA                  | NA                  | NA             | NA                  | NA               | NA                | 1 (5.9)         | NA                 | NA                | NA                       |
| Chronic liver disease          | 7 (11.3)          | NA              | NA                  | NA                  | NA             | 8 (2.7)             | NA               | NA                | 1 (5.9)         | 1 (0.4)            | NA                | NA                       |
| Chronic pharyngitis            | NA                | NA              | NA                  | NA                  | NA             | NA                  | NA               | NA                | 1 (5.9)         | NA                 | NA                | NA                       |
| Hepatitis B infection          | NA                | NA              | NA                  | 4 (2.8)             | 1 (2.0)        | NA                  | NA               | NA                | NA              | NA                 | NA                | 23 (2.1)                 |
| Abnormal lipid metabolism      | NA                | NA              | 2 (3.3)             | NA                  | NA             | NA                  | NA               | NA                | NA              | 4 (1.5)            | NA                | NA                       |
| Immune system diseases         | NA                | NA              | NA                  | NA                  | NA             | NA                  | NA               | NA                | NA              | 2 (0.8)            | NA                | 2 (0.2)                  |
| Symptom, n (%)                 |                   |                 |                     |                     |                |                     |                  |                   |                 |                    |                   |                          |
| Fever                          | 48 (77.4)         | 12 (92.3)       | 60 (98.4)           | 105 (74.5)          | 43 (84.3)      | 192 (64.4)          | 86 (84.3)        | 16 (80.0)         | 12(70.6)        | 220 (90.9)         | NA                | 473 (43.1)<br>966 (87.9) |
| Fatigue                        | 32 (51.6)         | 0               | 35 (57.4)           | 29 (20.6)           | 22 (43.1)      | 6 (2.0)             | 28 (27.5)        | 2 (10.0)          | 8(47.1)         | 67 (25.3)          | NA                | 419 (38.1)               |
| Myalgia                        |                   | 3 (23.1)        | 0                   | 0                   | 6 (11.8)       | 0                   | 3 (2.9)          | 0                 | 4(23.5)         | 23 (8.7)           | NA                | 163 (14.8)               |
| Headache                       | 21 (33.9)         | 3 (23.1)        | 21 (34.4)           | 5 (3.5)             | 5 (9.8)        | 4 (1.3)             | 0                | 3 (15.0)          | 0               | 26 (9.8)           | NA                | 150 (13.6)               |
| Chill                          | 0                 | 0               | 12 (19.7)           | 0                   | 0              | 0                   | 12 (11.8)        | 0                 | 0               | 0                  | NA                | 125 (11.4)               |
| Confusion/Dizziness            | 0                 | 0               | 0                   | 0                   | 7 (13.7)       | 0                   | 4 (3.9)          | 0                 | 2(11.8)         | 0                  | NA                | 0                        |
| Dyspnea                        | 0                 | 0               | 3 (4.9)             | 0                   | 11 (21.6)      | 0                   | 0                | 0                 | 0               | 5 (1.9)            | NA                | 0                        |
| Mild shortness of breath       | 0                 | 0               | 7 (11.5)            | 0                   | 0              | 0                   | 24 (23.5)        | 0                 | 0               | 12 (4.5)           | NA                | 204 (18.6)               |
| Cough                          | 50 (80.6)         | 6 (46.2)        | 39 (63.9)           | 74 (52.5)           | 38 (74.5)      | 54 (18.1)           | 58 (56.9)        | 11 (55.0)         | 13(76.5)        | 131 (49.4)         | NA                | 744 (67.7)               |
| Haemoptysis                    | 2 (3.2)           | 0               | 0                   | 0                   | 0              | 0                   | 0                | 0                 | 0               | 0                  | NA                | 10 (0.9)                 |

|                                             |                     |               |                     |                     |                  |                     |                 |                   |              |                  |    |                     |
|---------------------------------------------|---------------------|---------------|---------------------|---------------------|------------------|---------------------|-----------------|-------------------|--------------|------------------|----|---------------------|
| Sputum production/<br>Expectoration         | 35 (56.5)           | 2 (15.4)      | 27 (44.3)           | 16 (11.3)           | 16 (31.4)        | 0                   | 13 (12.7)       | 0                 | 3(17.6)      | 61 (23.0)        | NA | 367 (33.4)          |
| Sore throat/Pharyngalgia                    | 0                   | 0             | 10 (16.4)           | 0                   | 2 (3.9)          | 3 (1.0)             | 6 (5.9)         | 0                 | 0            | 12 (4.5)         | NA | 153 (13.9)          |
| Nasal congestion/<br>Rhinorrhoea            | 0                   | 8 (61.5)      | 0                   | 0                   | 3 (5.9)          | 2 (0.1)             | 0               | 0                 | 2(11.8)      | 16 (6.0)         | NA | 53 (4.8)            |
| Sneezing                                    | 0                   | 0             | 0                   | 0                   | 0                | 0                   | 0               | 0                 | 0            | 0                | NA | 0                   |
| Throat congestion                           | 0                   | 0             | 0                   | 0                   | 0                | 0                   | 0               | 0                 | 0            | 0                | NA | 19 (1.7)            |
| Tonsil swelling                             | 0                   | 0             | 0                   | 0                   | 0                | 0                   | 0               | 0                 | 0            | 0                | NA | 23 (2.1)            |
| Respiratory failure                         | 0                   | 0             | 0                   | 0                   | 0                | 0                   | 9 (8.8)         | 0                 | 0            | 0                | NA | 0                   |
| Chest pain                                  | 0                   | 0             | 1 (1.6)             | 0                   | 0                | 0                   | 3/102 (2.9)     | 0                 | 0            | 6 (2.3)          | NA | 0                   |
| Palpitation                                 | 0                   | 0             | 0                   | 0                   | 0                | 0                   | 2 (2.0)         | 0                 | 0            | 0                | NA | 0                   |
| Abdominal pain                              | 0                   | 0             | 0                   | 0                   | 0                | 0                   | 3 (2.9)         | 0                 | 0            | 0                | NA | 0                   |
| Anorexia                                    | 0                   | 0             | 8 (13.1)            | 5 (3.5)             | 0                | 0                   | 11 (10.8)       | 0                 | 0            | 31 (11.7)        | NA | 0                   |
| Nausea                                      | 0                   | 0             | 5 (8.2)             | 0                   | 3 (5.9)          | 0                   | 9 (8.8)         | 1 (5.0)           | 0            | 6 (2.3)          | NA | 55 (5.0)            |
| Vomiting                                    | 0                   | 0             | 0                   | 0                   | 3 (5.9)          | 0                   | 2 (2.0)         | 0                 | 0            | 0                | NA | 0                   |
| Diarrhea                                    | 3 (4.8)             | 1 (7.7)       | 6 (9.8)             | 6 (4.3)             | 4 (7.8)          | 6 (2.0)             | 15 (14.3)       | 3 (15.0)          | 2(11.8)      | 17 (6.4)         | NA | 41 (3.7)            |
| Laboratory findings, mean (sd)/median (IQR) |                     |               |                     |                     |                  |                     |                 |                   |              |                  |    |                     |
| WBC, × 10 <sup>9</sup> /L                   | 4.7 (3.5-5.8)       | 5.83 (2.32)   | 4.3 (3.5-5.1)       | 4.6 (3.4-6.3)       | 5.4 (4.1-7.6)    | 4.59 (3.64-5.63)    | 4.84 (1.62)     | 4.21 (4.03-6.70)  | 6.2(2.5)     | 4.6 (3.8-5.9)    | NA | 4.7 (3.5-6.0)       |
| N, × 10 <sup>9</sup> /L                     | 2.9 (2.0-3.7)       | 3.67 (1.71)   | 2.5 (2.1-3.5)       | 3.4 (2.3-4.3)       | 3.7 (2.5-6.0)    | 2.57 (1.93-3.49)    | 3.21 (1.43)     | 2.88 (2.25-4.63)  | 4.6(2.8)     | 1.1 (0.8-1.5)    | NA | NA                  |
| L, × 10 <sup>9</sup> /L                     | 1 (0.8-1.5)         | 1.58 (0.653)  | 1.0 (0.8-1.4)       | 1.1 (0.7-1.6)       | 1.1 (0.7-1.6)    | 1.22 (0.91-1.74)    | 1.18 (0.73)     | 1.21 (0.91-1.46)  | 1.1(0.5)     | 2.9 (2.3-3.9)    | NA | 1.0 (0.7-1.3)       |
| M, × 10 <sup>9</sup> /L                     | NA                  | 0.527 (0.208) | 0.3 (0.2-0.4)       | NA                  | NA               | NA                  | 0.41 (0.19)     | NA                | 0.4(0.2)     | NA               | NA | NA                  |
| NLR                                         | NA                  | NA            | 2.6 (1.6-3.5)       | 3.4 (2.1-4.2)       | NA               | NA                  | NA              | NA                | NA           | NA               | NA | NA                  |
| CRP, mg/L                                   | NA                  | 14.7 (10.2)   | 12.0 (3.7-27.8)     | 21.7 (9.4-33.5)     | 10.5 (2.7-51.2)  | 20.91 (6.61-47.13)  | 28.16 (26.72)   | 9.68 (1.63-25.83) | 32.1(34.2)   | 9.8 (2.5-27.4)   | NA | NA                  |
| Hb, g/L                                     | 137.0 (128.8-152.3) | 147 (12.1)    | 138.0 (127.0-150.5) | NA                  | 136 (123-152)    | NA                  | NA              | 145 (131.25-158)  | 140.5(13.1)  | 136.1 (18.01)    | NA | 134.0 (119.0-148.0) |
| PLT, × 10 <sup>9</sup> /L                   | 176.0 (135.8-215.5) | 199 (72.5)    | 164.0 (135.0-219.5) | 188.5 (134.8-240.0) | 189 (134-235)    | NA                  | NA              | 199 (146-248.25)  | 227.1(111.6) | 176 (141-219)    | NA | 168.0 (132.0-207.0) |
| PT, s                                       | NA                  | NA            | 12.0 (11.1-13.1)    | NA                  | NA               | NA                  | NA              | NA                | 11.8(0.9)    | 13.3 (13.00-13.) | NA | NA                  |
| Potassium, mmol/L                           | 3.7 (3.5-3.9)       | NA            | 3.8 (3.5-4.1)       | NA                  | NA               | NA                  | NA              | NA                | NA           | 3.80 (3.60-4.00) | NA | 3.8 (3.5-4.2)       |
| Sodium, mmol/L                              | 139 (127-141)       | NA            | 139.0 (137.0-140.0) | NA                  | NA               | NA                  | NA              | NA                | NA           | 139 (137-141)    | NA | 138.2 (136.1-140.3) |
| Scr, μmol/L                                 | 72.0 (61.0-84.0)    | NA            | 60.0 (47.0-69.5)    | 73.3 (65.4-75.5)    | 67 (60-79)       | 102 (72-122)        | NA              | NA                | 65.8(14.1)   | 63.6 (52.4-76.1) | NA | NA                  |
| CK, U/L                                     | 69.0 (40.5-101.0)   | NA            | 93.0 (57.0-137.0)   | NA                  | 52 (38-79)       | 283 (105-407.5)     | 139.32 (121.66) | NA                | 114.9(91.8)  | 83 (56-133)      | NA | NA                  |
| ALT, U/L                                    | 22 (14-34)          | NA            | 19.0 (14.0-33.5)    | NA                  | 18 (14-30)       | 48 (24.5-59.5)      | 27.77 (21.13)   | 21.50 (15-31.25)  | NA           | 23.0 (15.0-33.0) | NA | NA                  |
| Albumin, g/L                                | NA                  | NA            | 44.0 (40.5-47.0)    | 38 (32.7-39.2)      | 40 (36-43)       | NA                  | NA              | 43 (40.5-46.95)   | NA           | 40.8 (37.8-43.0) | NA | NA                  |
| APTT, s                                     | NA                  | NA            | NA                  | NA                  | NA               | NA                  | NA              | NA                | 31.1(2.6)    | 39.5 (36.3-42.6) | NA | NA                  |
| D-dimer, mg/L                               | 0.2 (0.2-0.5)       | NA            | NA                  | NA                  | 0.28 (0.19-0.51) | 0.39 (0.27-0.63)    | NA              | NA                | 217.4(150.0) | 0.42 (0.29-0.80) | NA | NA                  |
| ASL, U/L                                    | 26 (20-32)          | NA            | NA                  | NA                  | 21 (16-30)       | 48 (30-65)          | 30.59 (15.03)   | 23 (18.5-27)      | NA           | 24.0 (19.0-33.0) | NA | NA                  |
| TBil, mmol/L                                | NA                  | NA            | NA                  | NA                  | NA               | 14 (10-22)          | NA              | 6.70 (6.15-7.75)  | 17.7(13.5)   | 7.9 (6.5-10.5)   | NA | NA                  |
| LDH, U/L                                    | 205.0 (184.0-260.0) | NA            | NA                  | NA                  | 231 (188-276)    | 412.5 (317.8-687.3) | 245.38 (14.35)  | NA                | 316.2(115.9) | 232 (195-293)    | NA | NA                  |
| cTnI, pg/mL                                 | NA                  | NA            | NA                  | NA                  | NA               | NA                  | NA              | NA                | NA           | 0.02 (0.01-0.04) | NA | NA                  |
| PCT, ng/mL                                  | 0.04 (0.03-0.06)    | NA            | NA                  | NA                  | 0.04 (0.03-0.07) | 0.05 (0.03-0.08)    | NA              | NA                | 0.064(0.059) | 0.03 (0.02-0.06) | NA | NA                  |



|                                                |           |               |               |            |               |                      |                 |    |               |                  |         |    |
|------------------------------------------------|-----------|---------------|---------------|------------|---------------|----------------------|-----------------|----|---------------|------------------|---------|----|
| BUN, mmol/L                                    | NA        | NA            | 4.3 (3.5-5.6) | NA         | 4.1 (3.3-5.7) | 8 (6-10)             | NA              | NA | NA            | NA               | NA      | NA |
| Mb, ng/mL                                      | NA        | NA            | NA            | NA         | NA            | 127.5 (67.75-216.25) | 39.61 (30.87)   | NA | NA            | 6.7 (3.1-15.3)   | NA      | NA |
| ESR, mm/h                                      | NA        | NA            | NA            | NA         | NA            | 30 (15-50)           | 33.30 (23.39)   | NA | NA            | 50.5 (29.0-90.0) | NA      | NA |
| SF, ng/mL                                      | NA        | NA            | NA            | NA         | NA            | NA                   | 269.89 (124.88) | NA | NA            | NA               | NA      | NA |
| Eosinophils, ×10 <sup>9</sup> /L               | NA        | 0.045 (0.072) | NA            | NA         | NA            | NA                   | NA              | NA | 0.02(0.03)    | NA               | NA      | NA |
| Basophils, ×10 <sup>9</sup> /L                 | NA        | 0.008 (0.006) | NA            | NA         | NA            | NA                   | NA              | NA | 0.0007(0.003) | NA               | NA      | NA |
| CKMB, U/L                                      | NA        | NA            | NA            | NA         | NA            | 1.5 (1.0-4.25)       | 13.94 (10.25)   | NA | 15.2(3.7)     | NA               | NA      | NA |
| Fibrinogen, g/L                                | NA        | NA            | NA            | NA         | NA            | NA                   | NA              | NA | NA            | NA               | NA      | NA |
| NT-proBNP, pg/ml                               | NA        | NA            | NA            | NA         | NA            | NA                   | NA              | NA | NA            | 34.6 (23.0-67.6) | NA      | NA |
| eGFR, ml/min/1.73m <sup>2</sup>                | NA        | NA            | NA            | NA         | NA            | NA                   | NA              | NA | NA            | 110 (96-127)     | NA      | NA |
| Lactic acid, mmol/L                            | NA        | NA            | NA            | NA         | NA            | NA                   | NA              | NA | NA            | 2.74 (2.33-3.21) | NA      | NA |
| Radiologic findings, n/N (%)                   |           |               |               |            |               |                      |                 |    |               |                  |         |    |
| Bilateral lung involvement                     | 52 (83.9) | NA            | 48 (78.7)     | 123 (87.2) | NA            | NA                   | NA              | NA | NA            | 205 (77.4)       | NA      | NA |
| Timeline of illness, d, mean (sd)/median (IQR) |           |               |               |            |               |                      |                 |    |               |                  |         |    |
| Days from illness onset to admission time      | 2 (1-4)   | NA            | 5 (0-23)      | 4 (2-7)    | 6 (3-8)       | 5 (2-7)              | NA              | NA | NA            | 5.5 (5.1-5.9)    | 5 (2-9) | NA |
| Incubation period, days                        | 4 (3-5)   | NA            | NA            | NA         | NA            | NA                   | 8.09 (4.99)     | NA | NA            | 6.4 (5.3-7.6)    | NA      | NA |

**eFigure 1. Flow chart of studies selection.**

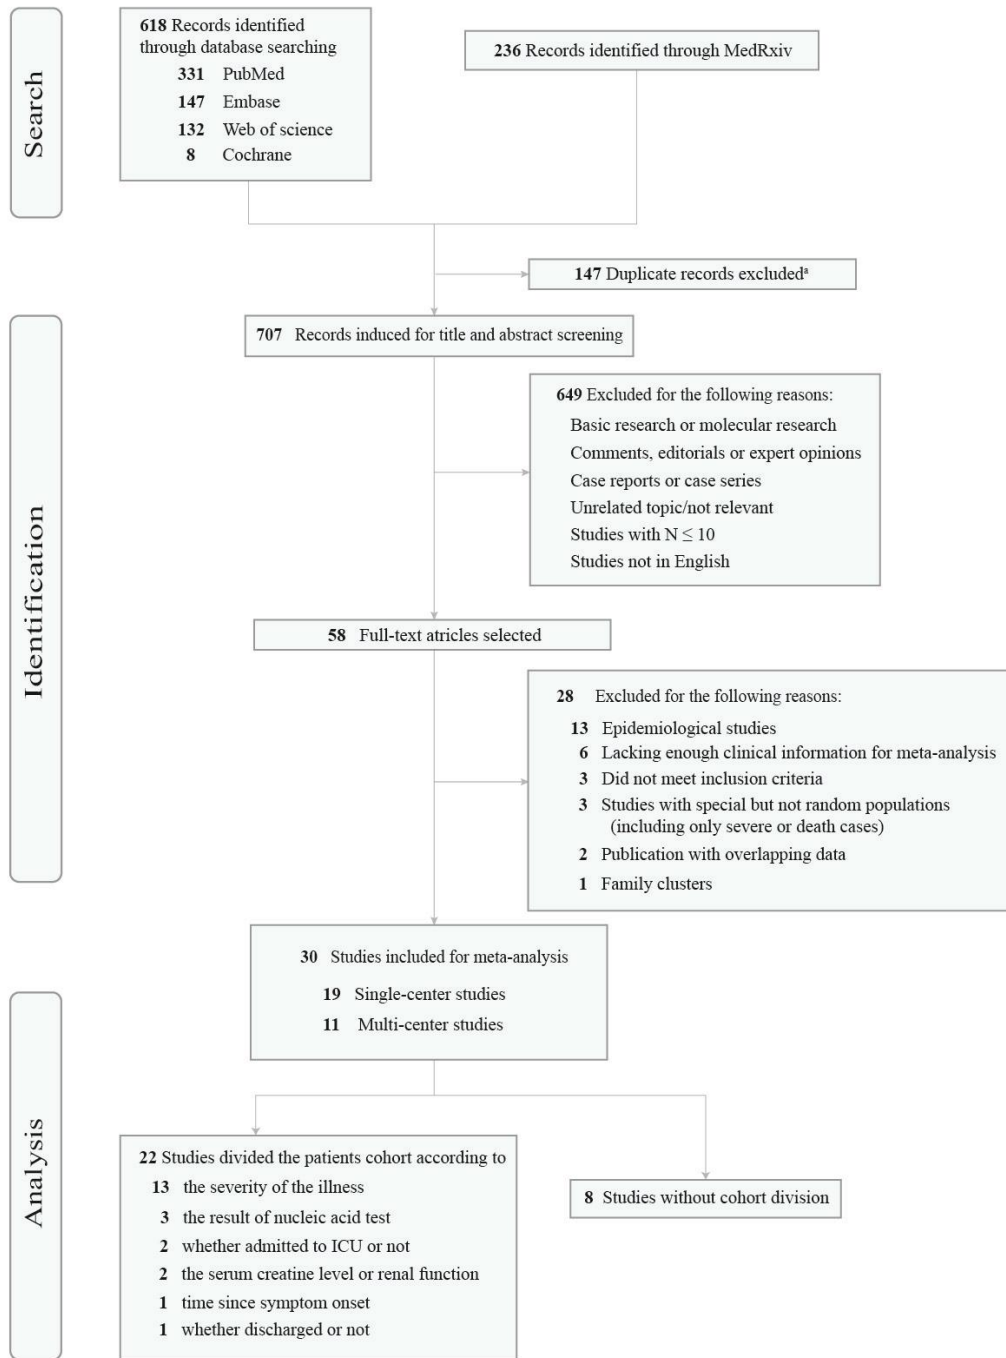

N, the number of COVID-19 confirmed patients; ICU, intensive care unit.

<sup>a</sup> EndNote software (Clarivate Analytics) was used to remove duplicates.

**eFigure 2. Forest plot of CSR and CFR.**

**CSR**

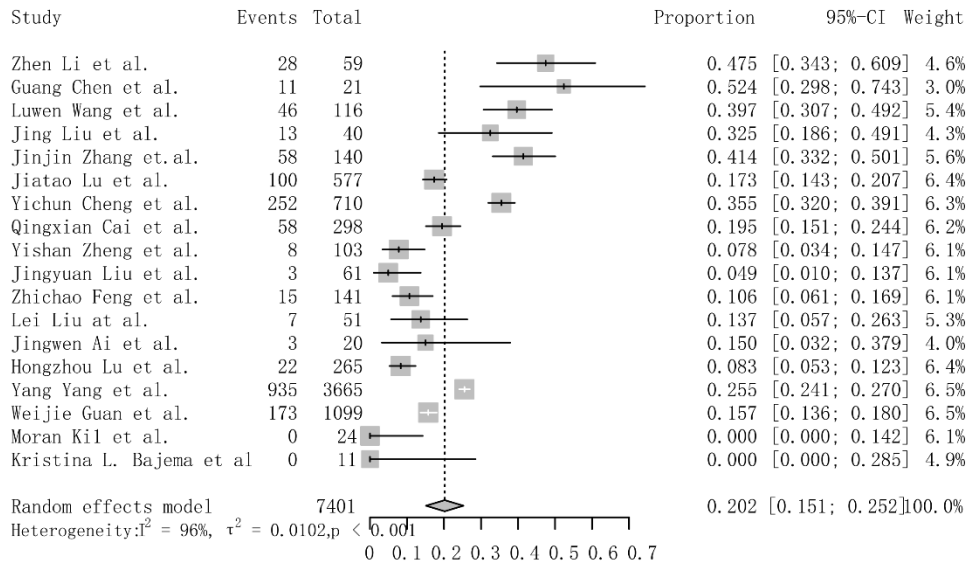

**CFR**

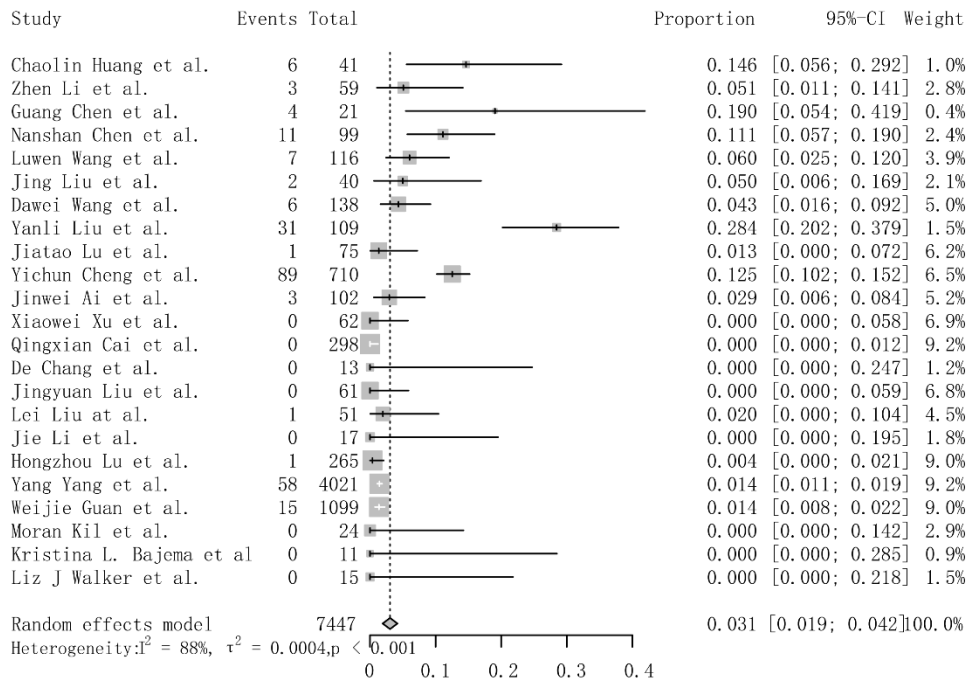

**eFigure 3. Meta-regression data for CSR and CFR using comprehensive meta-analysis software.**

Multivariate meta-regression for location and observation time on logit CSR

| Set      | Covariate                    | Coefficient | Standard Error | 95% Lower | 95% Upper | Z-value | 2-sided P-value |
|----------|------------------------------|-------------|----------------|-----------|-----------|---------|-----------------|
| Location | Intercept                    | 0.7723      | 0.9205         | -1.0319   | 2.5765    | 0.84    | 0.4015          |
|          | Location: 2 Outside Wuhan in | -1.3703     | 0.3249         | -2.0071   | -0.7334   | -4.22   | 0.0000          |
|          | Location: 3 Nationwide       | -1.2806     | 0.5192         | -2.2982   | -0.2630   | -2.47   | 0.0136          |
|          | Date                         | -0.0270     | 0.0180         | -0.0623   | 0.0083    | -1.50   | 0.1339          |

Q=22.57, df=2, p=0.0000

**Statistics for Model 1**

Test of the model: Simultaneous test that all coefficients (excluding intercept) are zero  
 Q = 26.26, df = 3, p = 0.0000  
 Goodness of fit: Test that unexplained variance is zero  
 Tau? = 0.2434, Tau = 0.4933, I? = 90.71%, Q = 129.23, df = 12, p = 0.0000

Multivariate meta-regression for location and observation time on logit CFR

| Set      | Covariate                    | Coefficient | Standard Error | 95% Lower | 95% Upper | Z-value | 2-sided P-value |
|----------|------------------------------|-------------|----------------|-----------|-----------|---------|-----------------|
| Location | Intercept                    | -1.5253     | 0.8924         | -3.2743   | 0.2237    | -1.71   | 0.0874          |
|          | Location: 2 Outside Wuhan in | -1.8151     | 0.6863         | -3.1602   | -0.4700   | -2.64   | 0.0082          |
|          | Location: 3 Nationwide       | -2.2079     | 0.6117         | -3.4068   | -1.0090   | -3.61   | 0.0003          |
|          | Date                         | -0.0162     | 0.0196         | -0.0546   | 0.0222    | -0.83   | 0.4081          |

Q=18.39, df=2, p=0.0001

**Statistics for Model 1**

Test of the model: Simultaneous test that all coefficients (excluding intercept) are zero  
 Q = 18.39, df = 3, p = 0.0004  
 Goodness of fit: Test that unexplained variance is zero  
 Tau? = 0.4672, Tau = 0.6835, I? = 77.59%, Q = 49.09, df = 11, p = 0.0000

Univariate meta-regression for onset-to-admission time on logit CSR

| Covariate | Coefficient | Standard Error | 95% Lower | 95% Upper | Z-value | 2-sided P-value |
|-----------|-------------|----------------|-----------|-----------|---------|-----------------|
| Intercept | -2.5759     | 1.0216         | -4.5783   | -0.5735   | -2.52   | 0.0117          |
| Date      | 0.2302      | 0.1626         | -0.0884   | 0.5488    | 1.42    | 0.1568          |

**Statistics for Model 1**

Test of the model: Simultaneous test that all coefficients (excluding intercept) are zero  
 Q = 2.00, df = 1, p = 0.1568  
 Goodness of fit: Test that unexplained variance is zero  
 Tau? = 0.8132, Tau = 0.9018, I? = 96.61%, Q = 235.83, df = 8, p = 0.0000

Univariate meta-regression for onset-to-admission time on logit CFR

| Covariate | Coefficient | Standard Error | 95% Lower | 95% Upper | Z-value | 2-sided P-value |
|-----------|-------------|----------------|-----------|-----------|---------|-----------------|
| Intercept | -5.9623     | 1.4962         | -8.8947   | -3.0299   | -3.99   | 0.0001          |
| Date      | 0.4868      | 0.2391         | 0.0181    | 0.9555    | 2.04    | 0.0418          |

**Statistics for Model 1**

Test of the model: Simultaneous test that all coefficients (excluding intercept) are zero  
 Q = 4.14, df = 1, p = 0.0418  
 Goodness of fit: Test that unexplained variance is zero  
 Tau? = 1.6701, Tau = 1.2923, I? = 92.54%, Q = 133.96, df = 10, p = 0.0000

**eFigure 4. Forest plots of clinical and baseline characteristics.**

**eFigure 4. 1. Forest plot of age.**

**A. Overall**

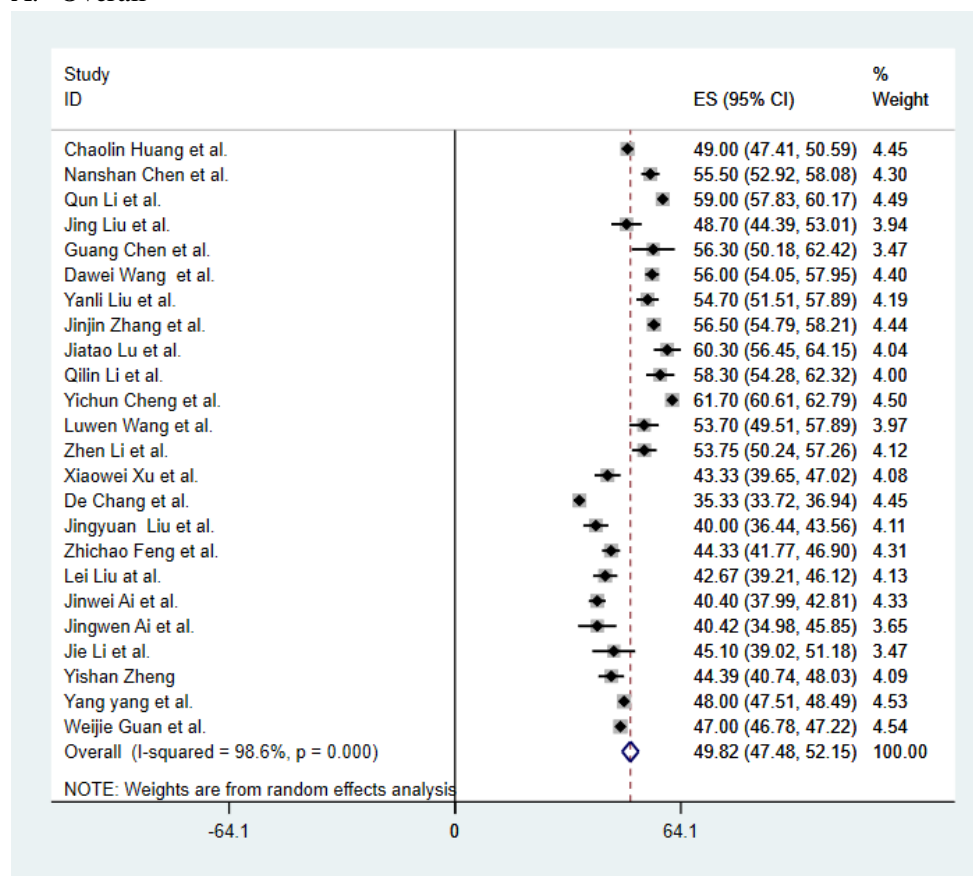

**B. Wuhan**

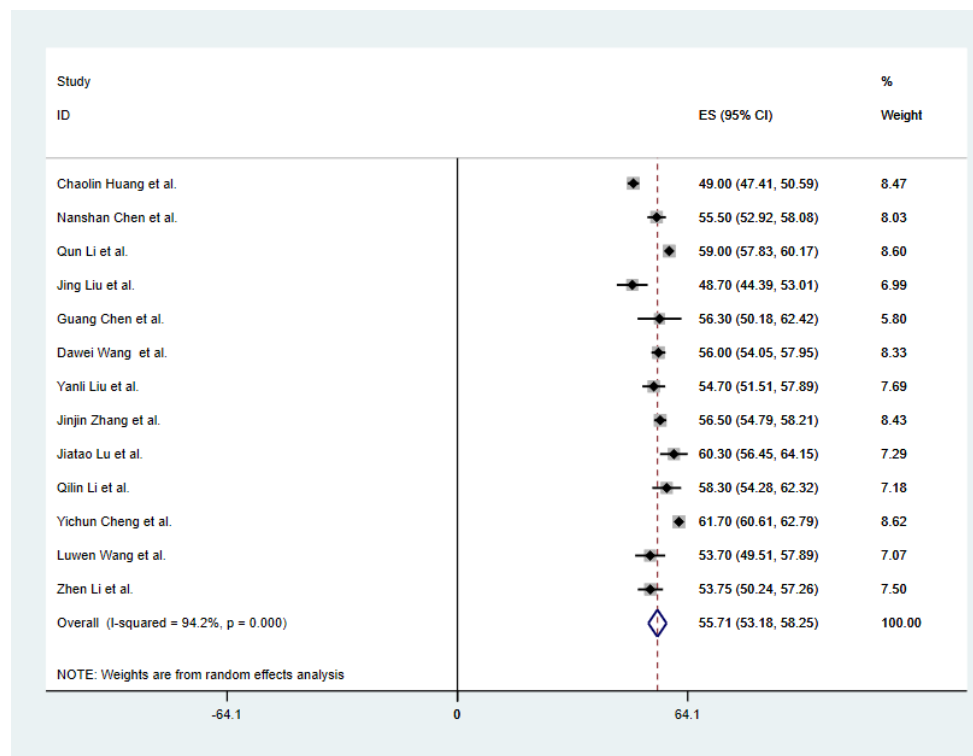

### C. Outside Wuhan

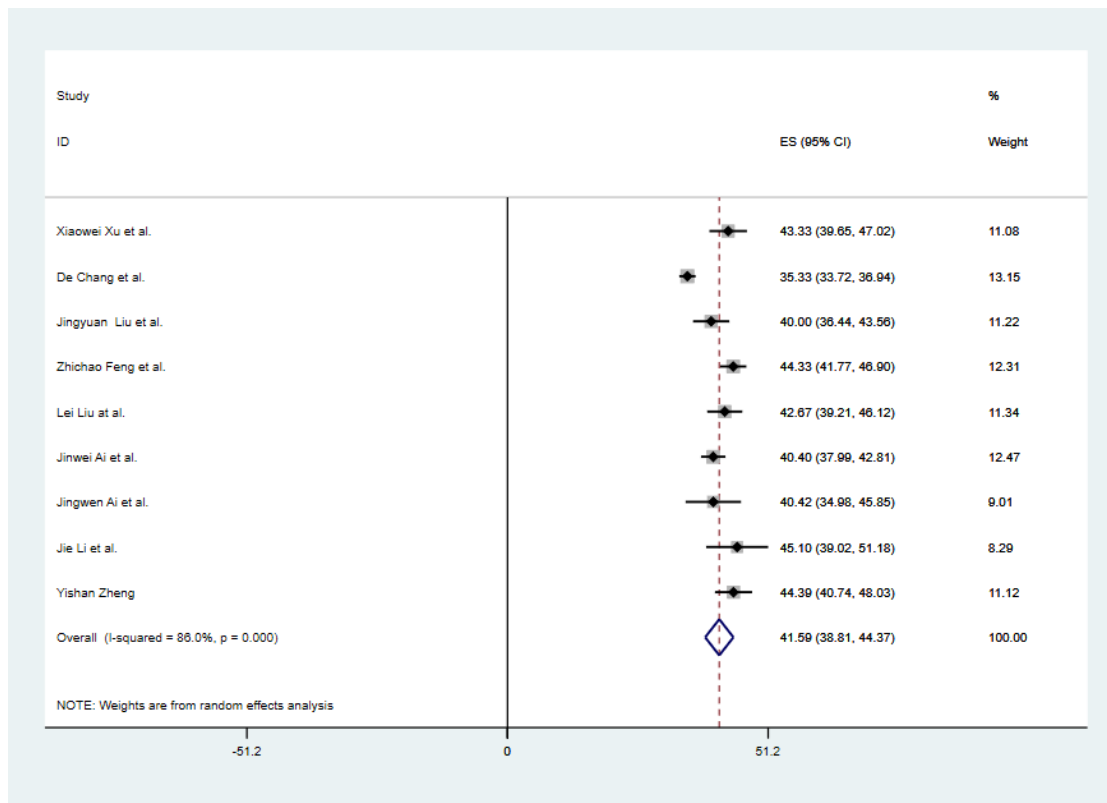

### D. Severe cases

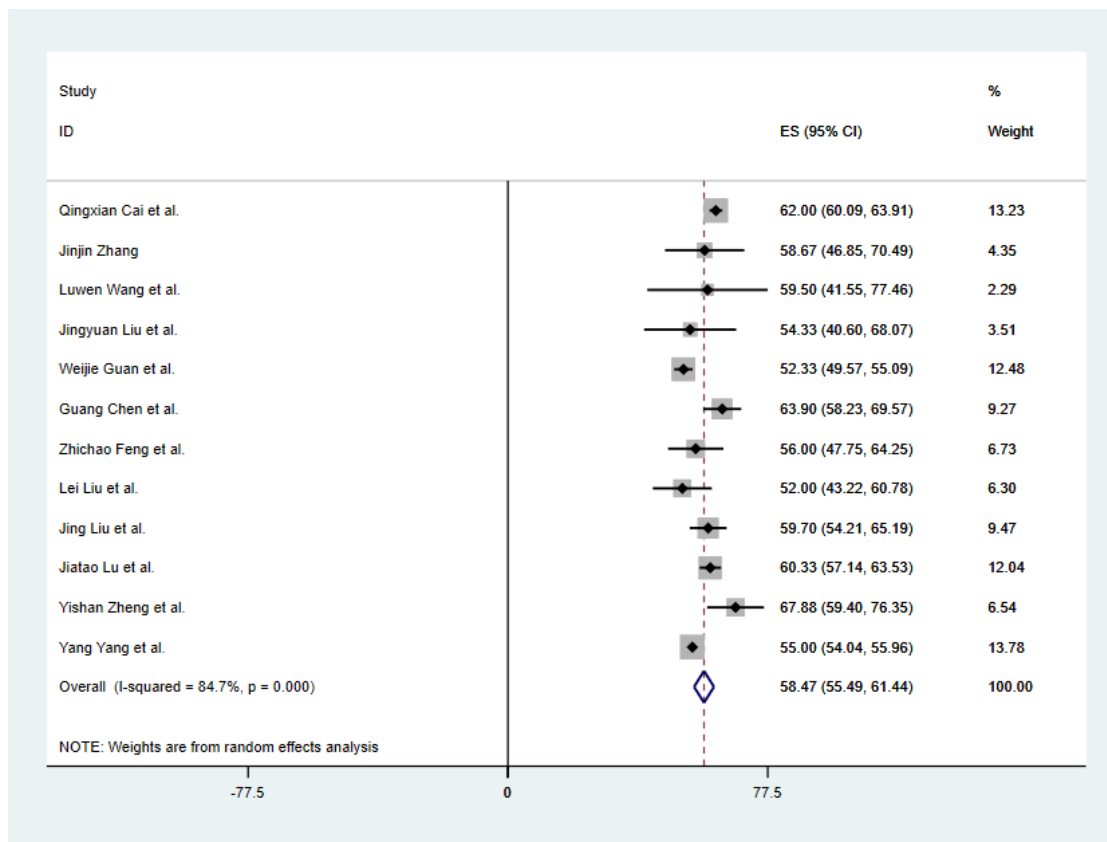

### E. Non-severe cases

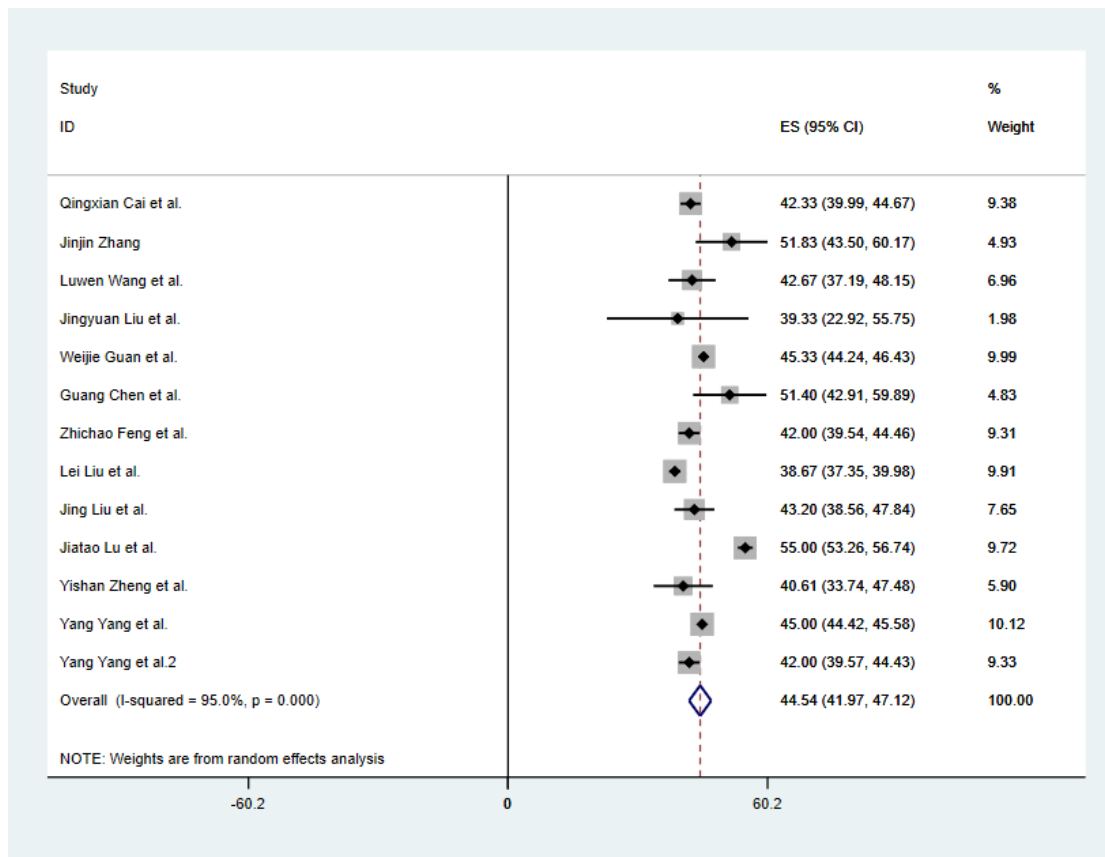

**eFigure 4. 2. Forest plot of onset-to-admission time.**

**A. Overall**

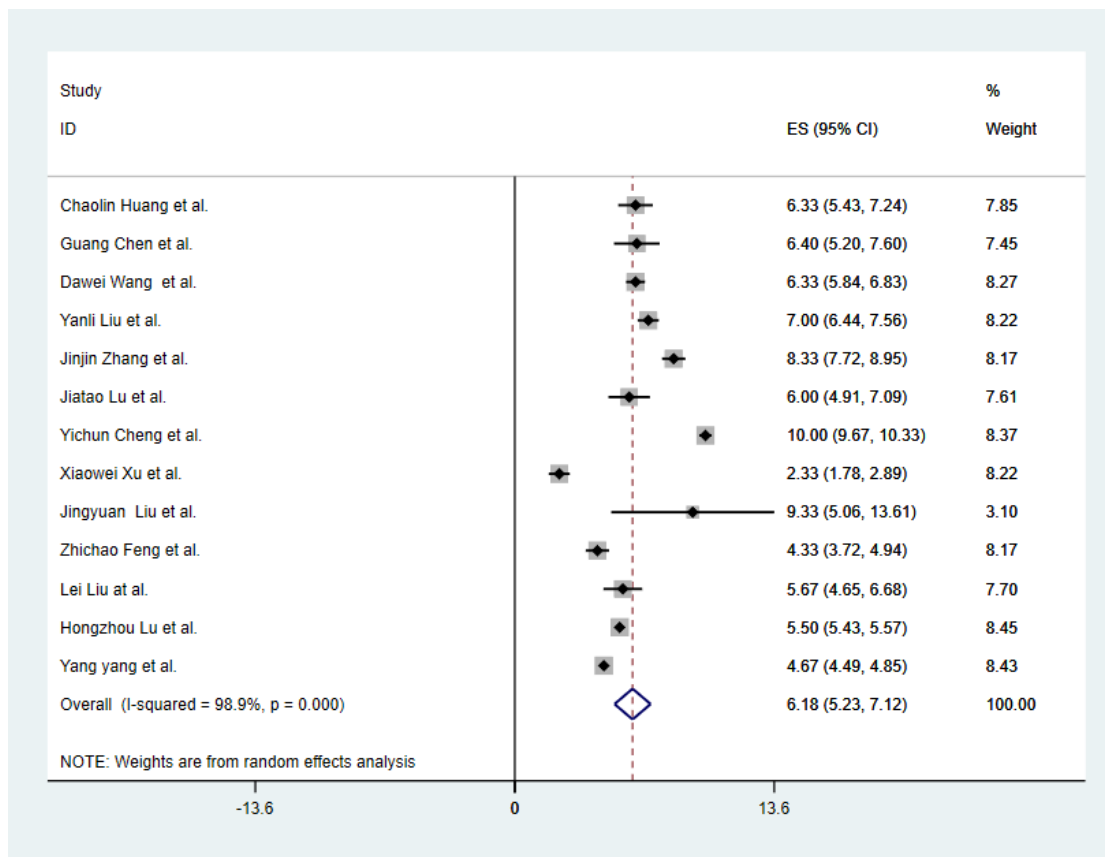

## B. Wuhan

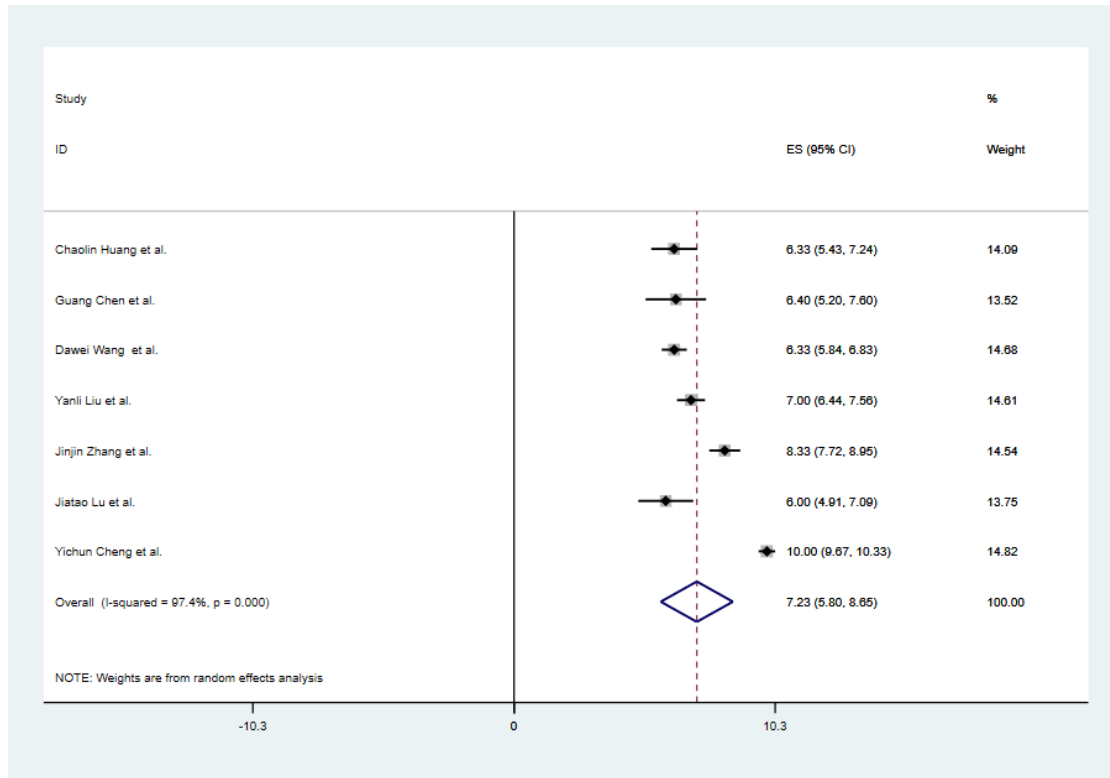

## C. Outside Wuhan

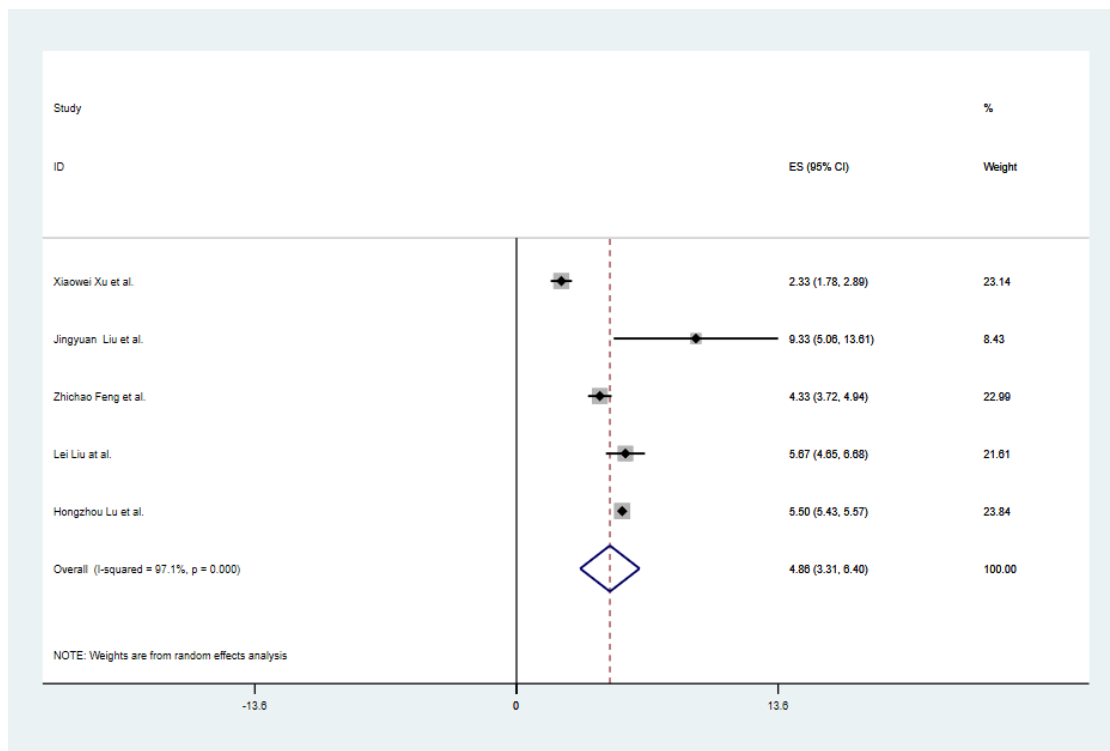

## D. Severe cases



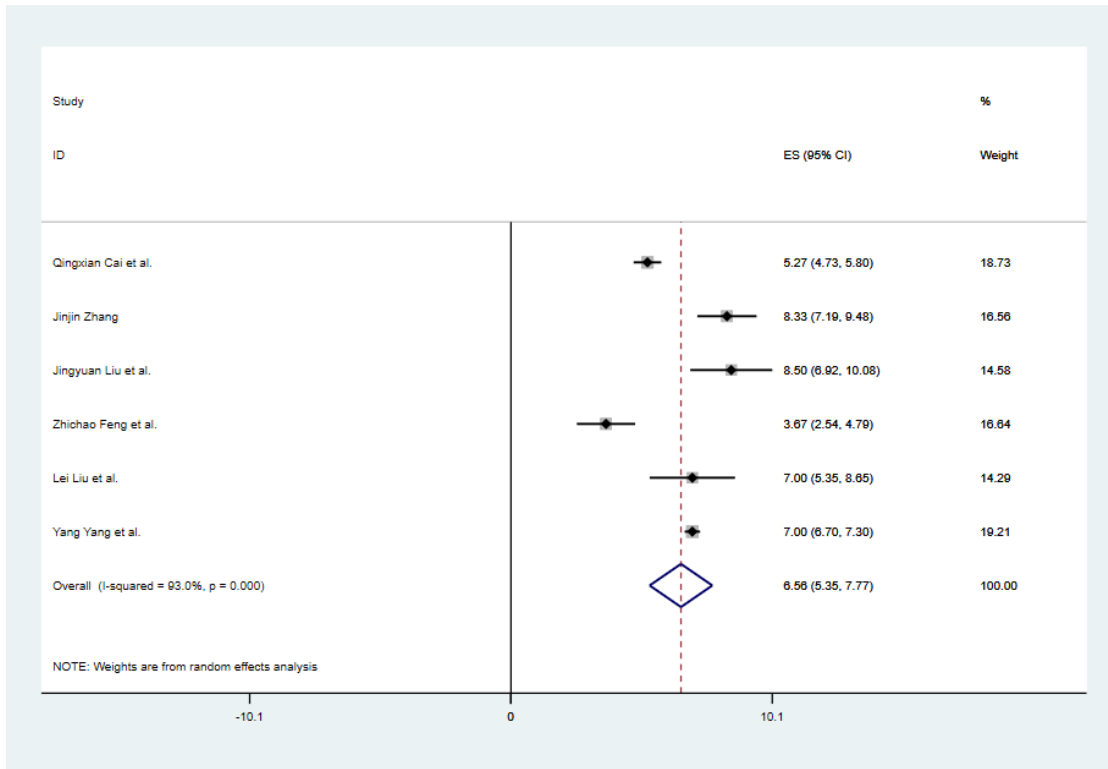

E. Non-severe cases

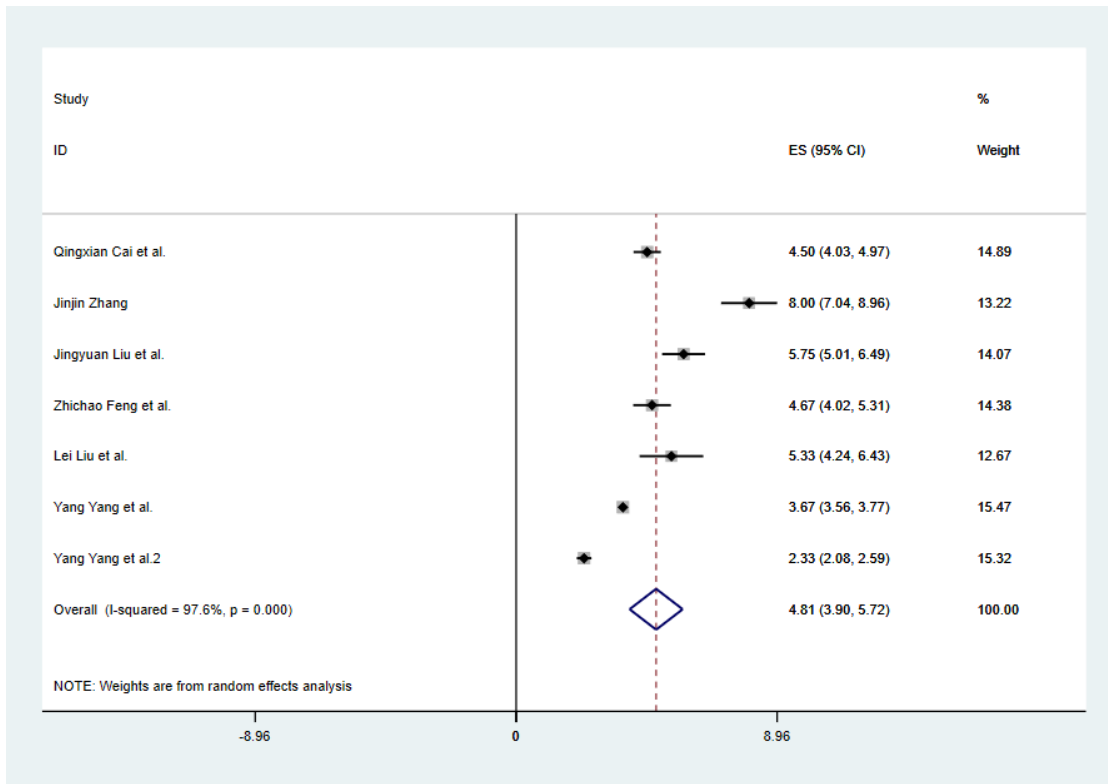

eFigure 4. 3. Forest plot of WBC, white blood cell count.

A. Overall

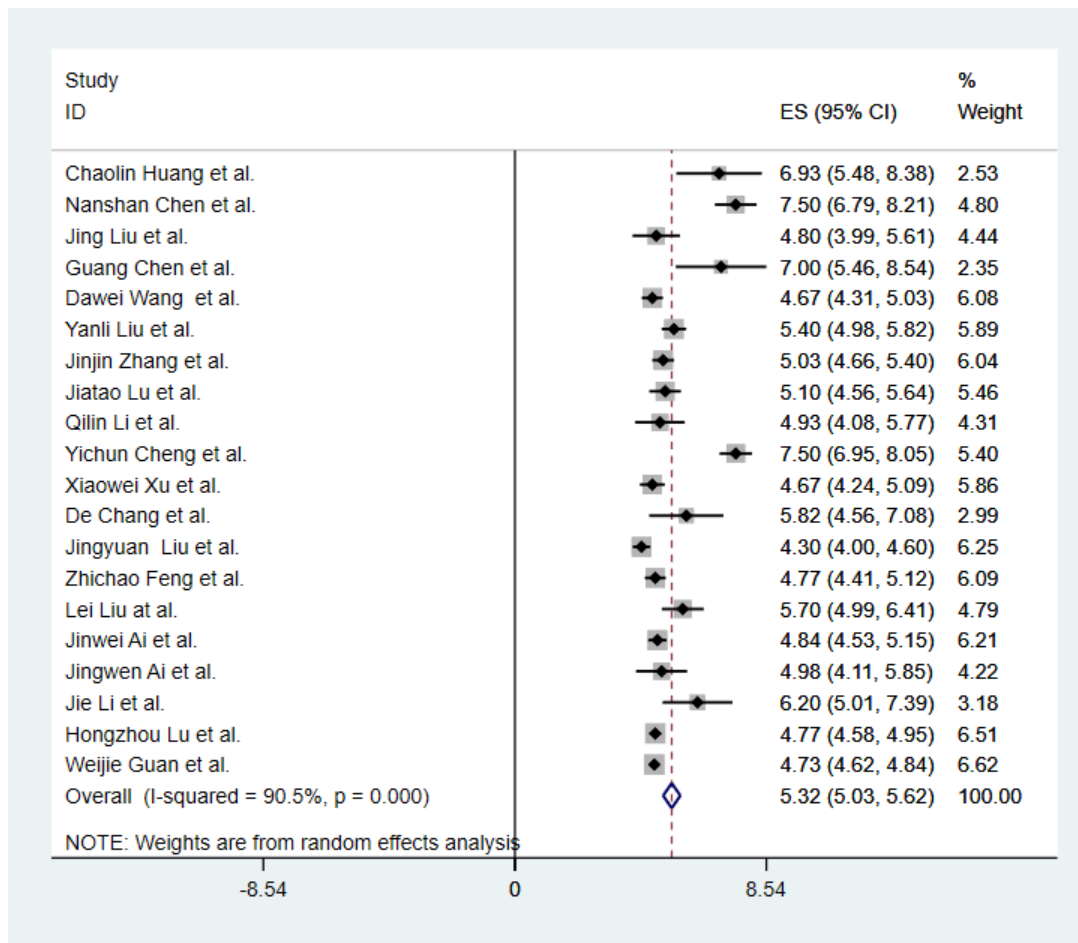

## B. Wuhan

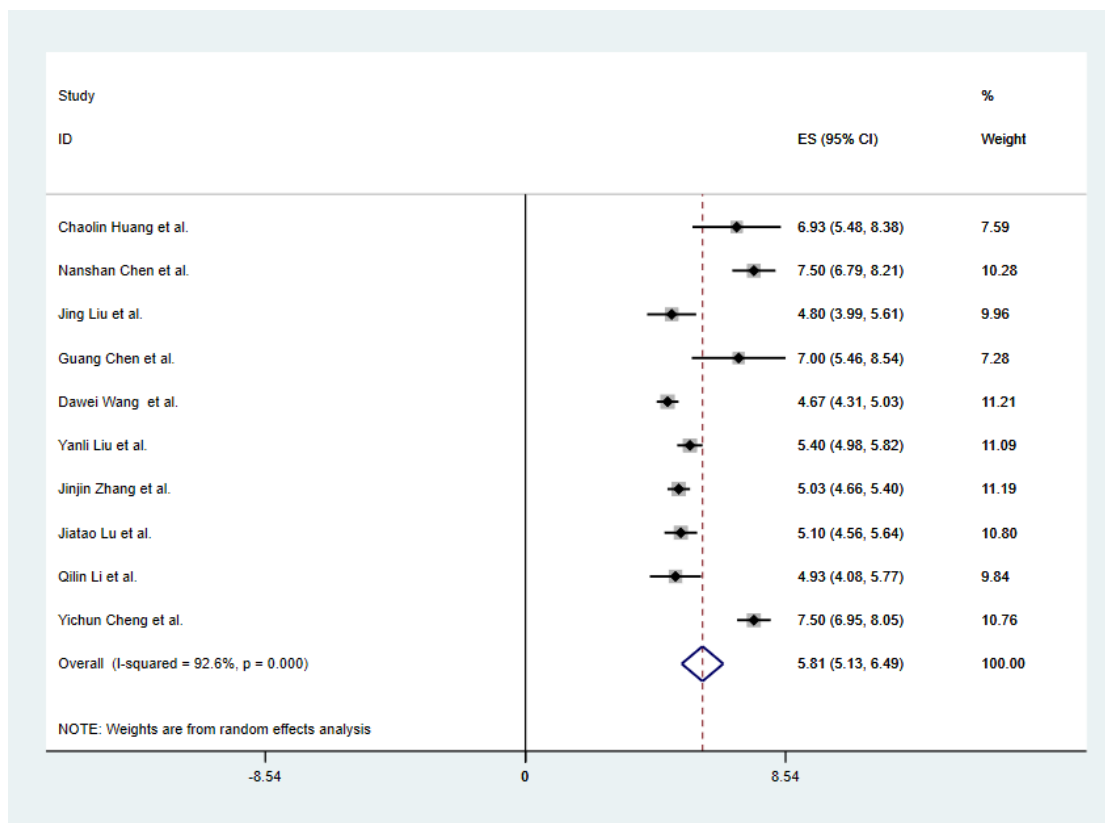

### C. Outside Wuhan

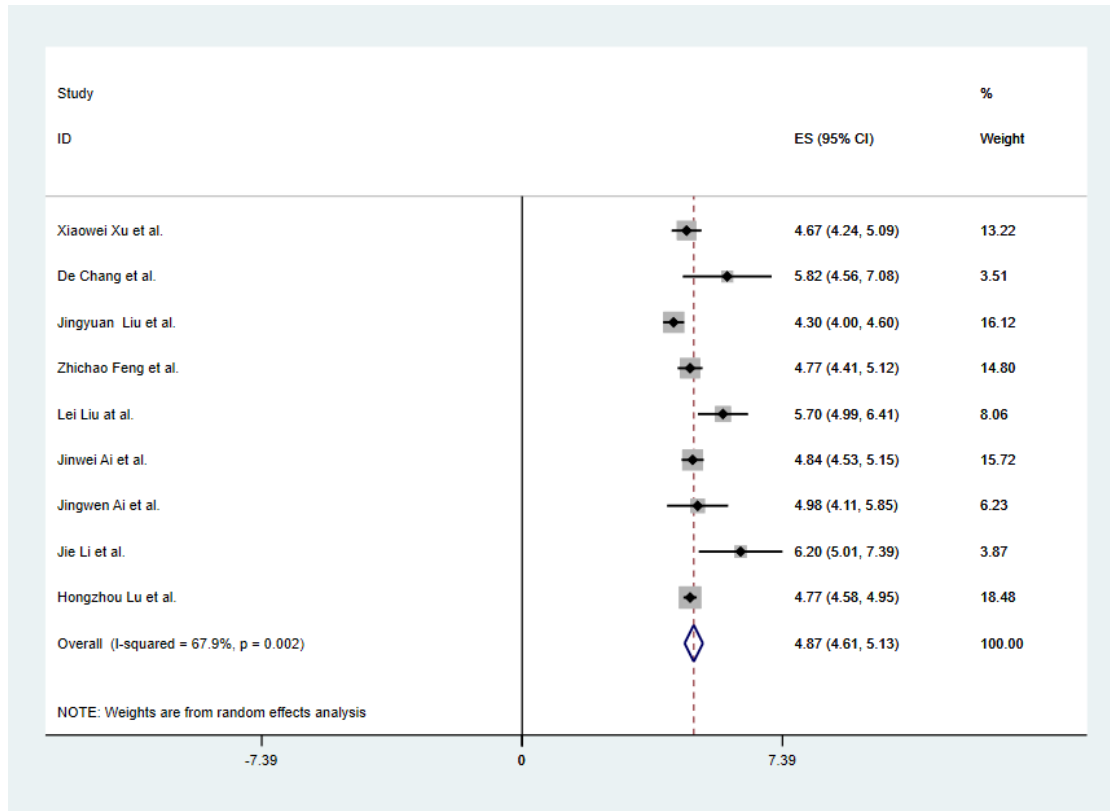

### D. Severe cases

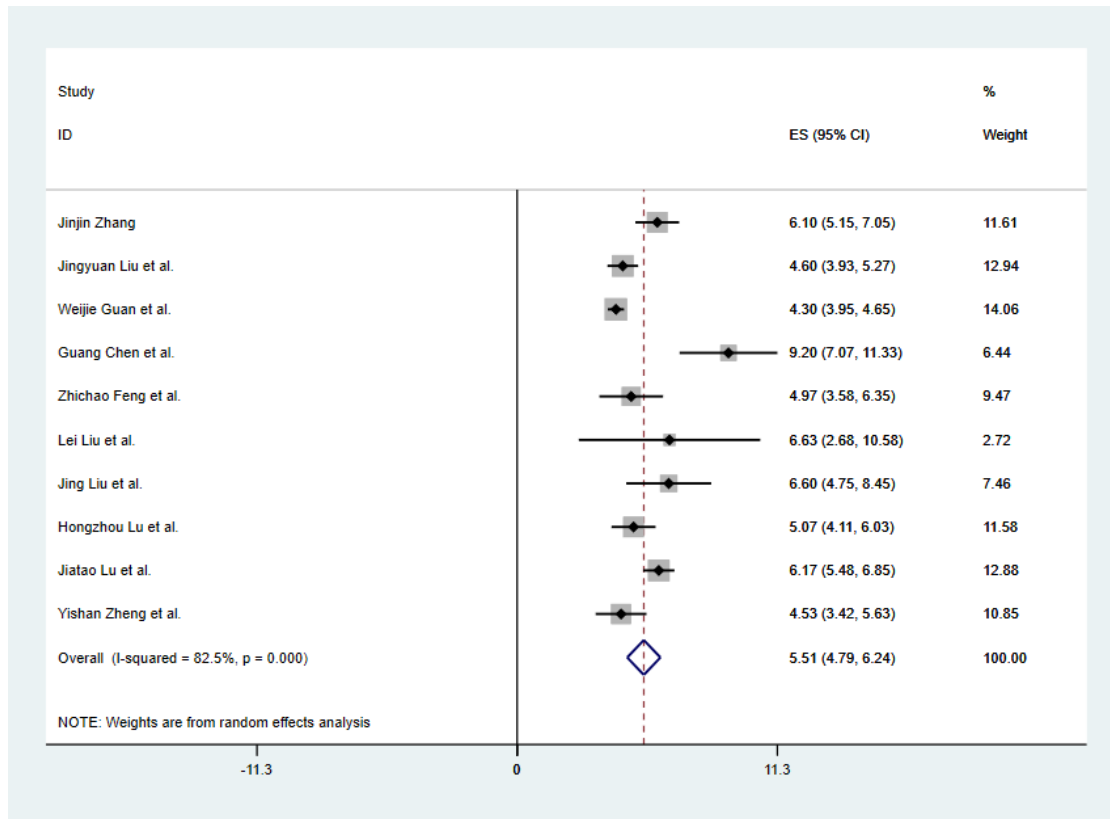

### E. Non-severe cases

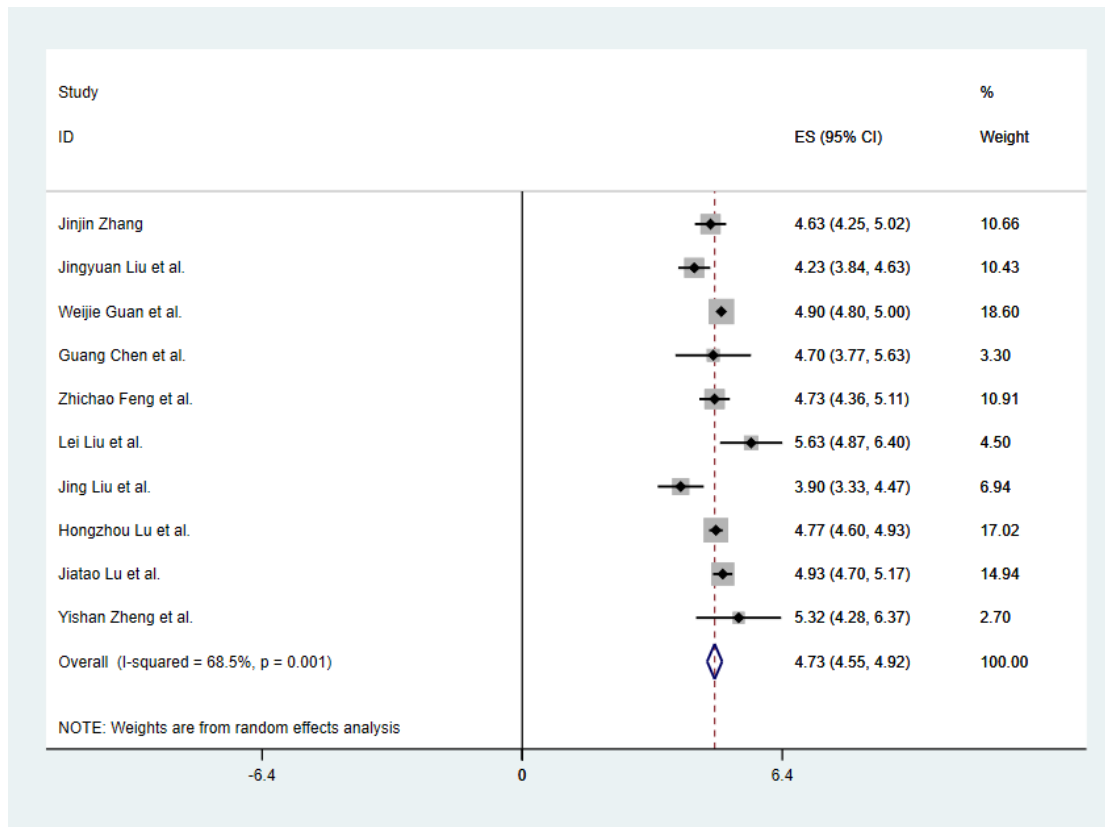

**eFigure 4. 4. Forest plot of N, neutrophil count.**

**A. Overall**

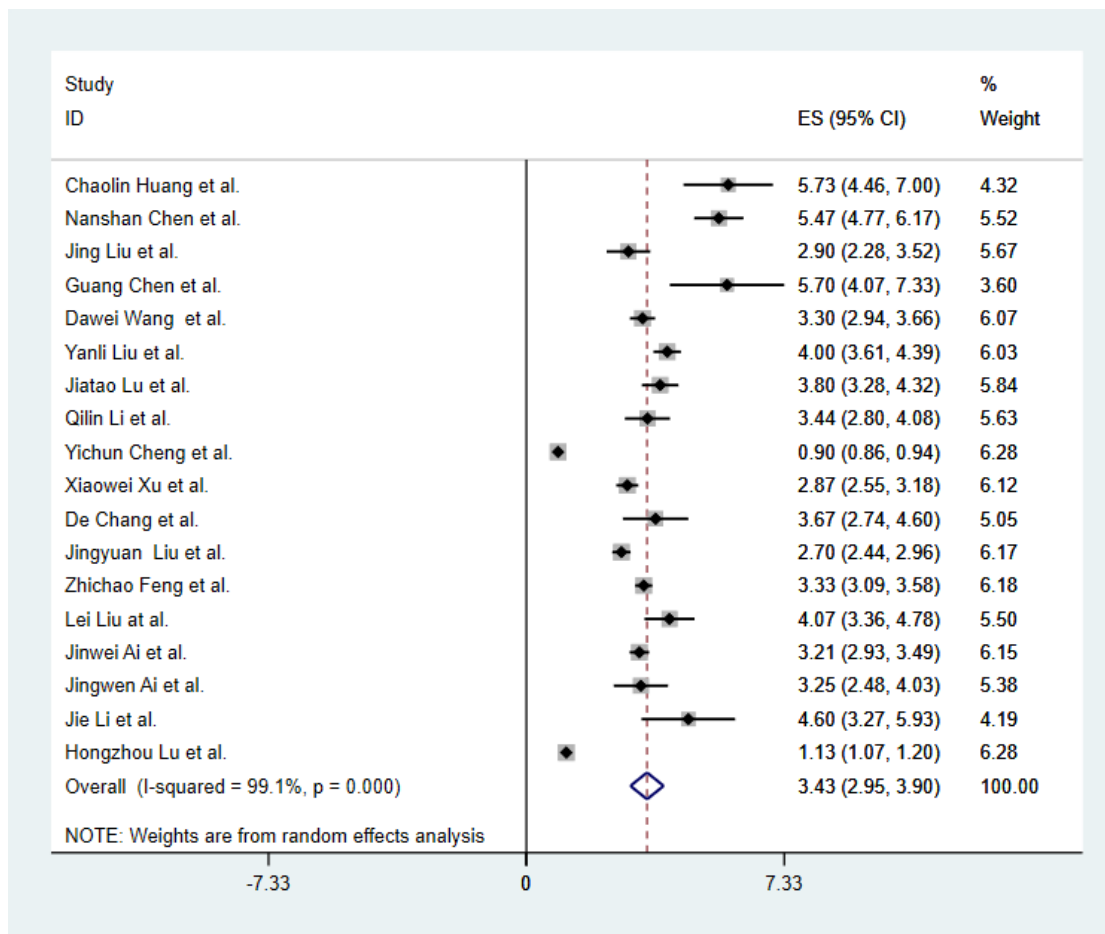

## B. Wuhan

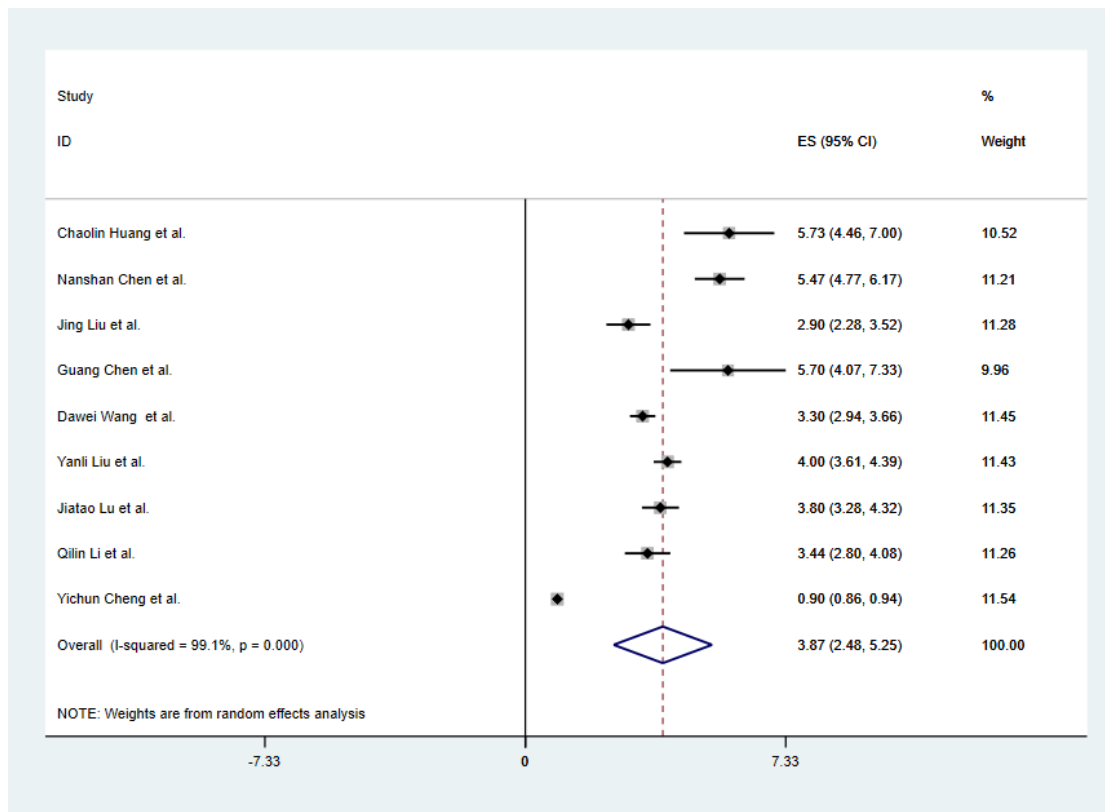

## C. Outside Wuhan

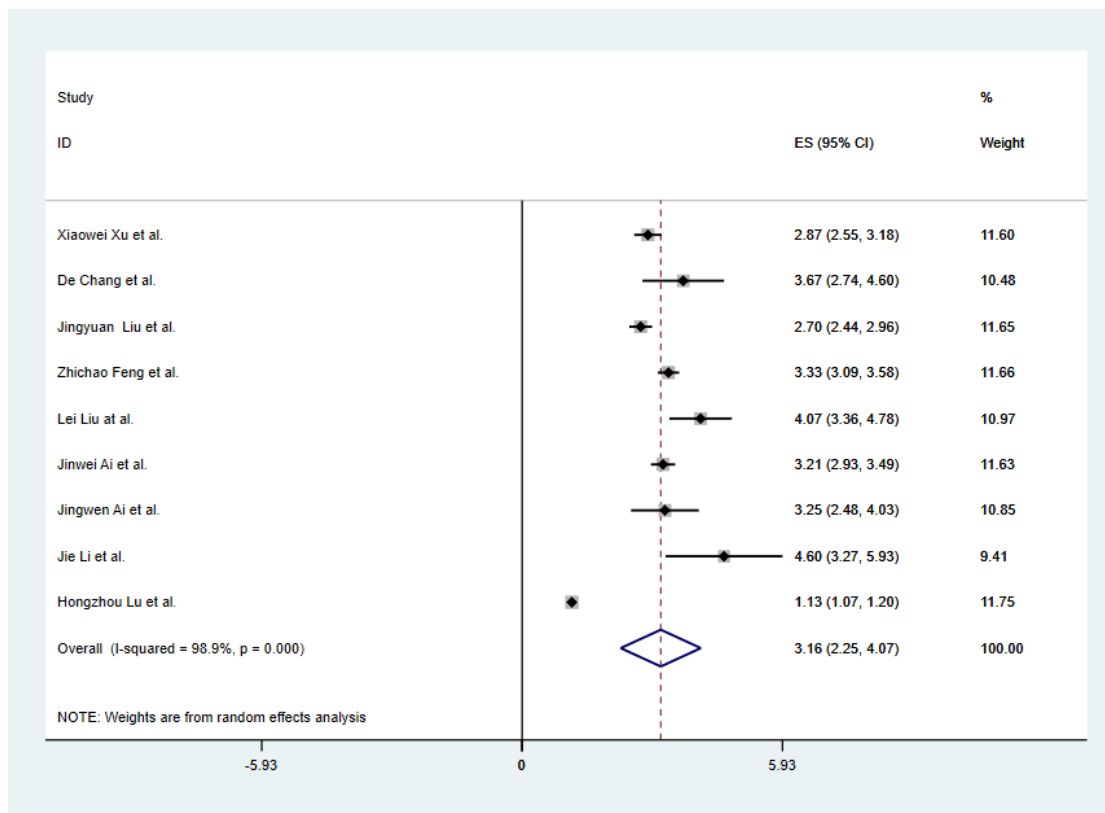

## D. Severe cases

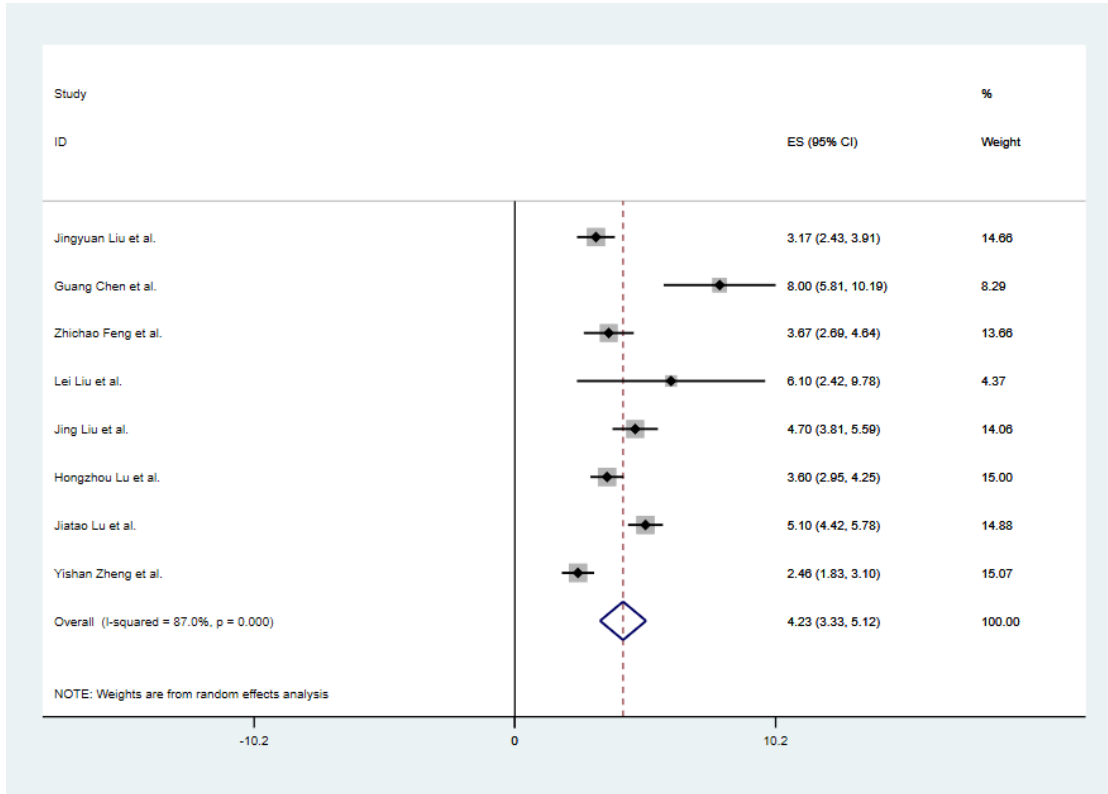

E. Non-severe cases

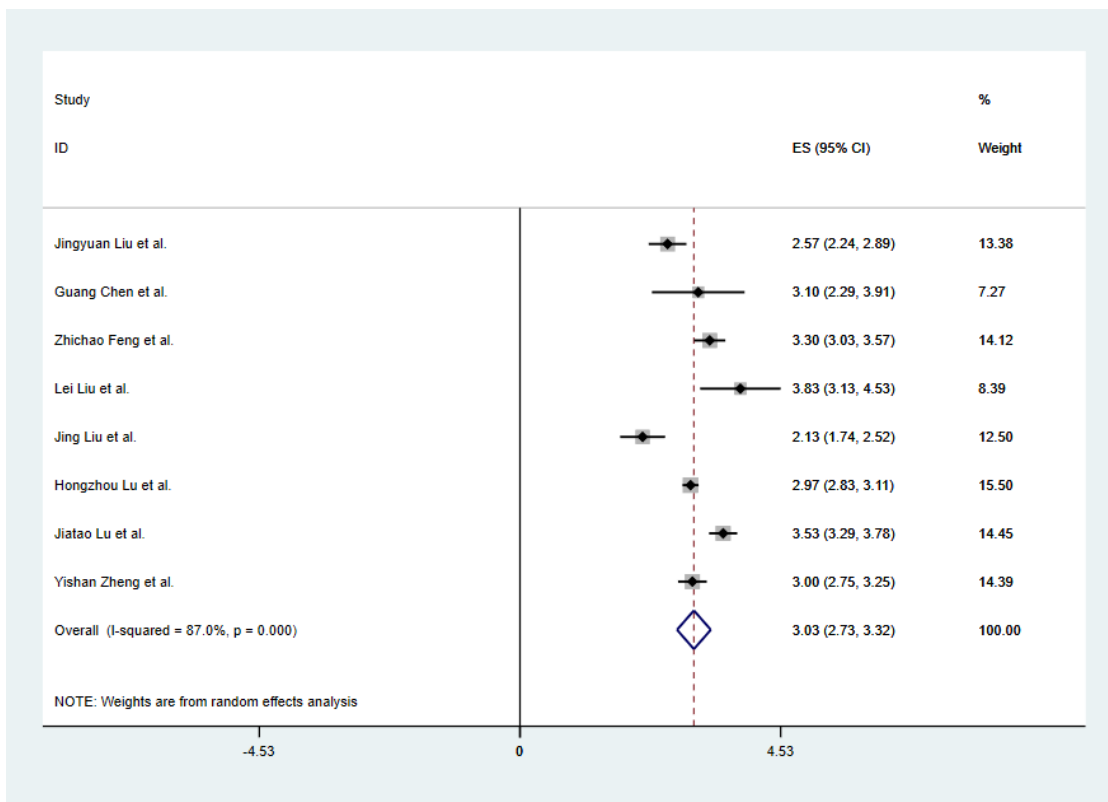

eFigure 4. 5. Forest plot of L, lymphocyte count.

A. Overall

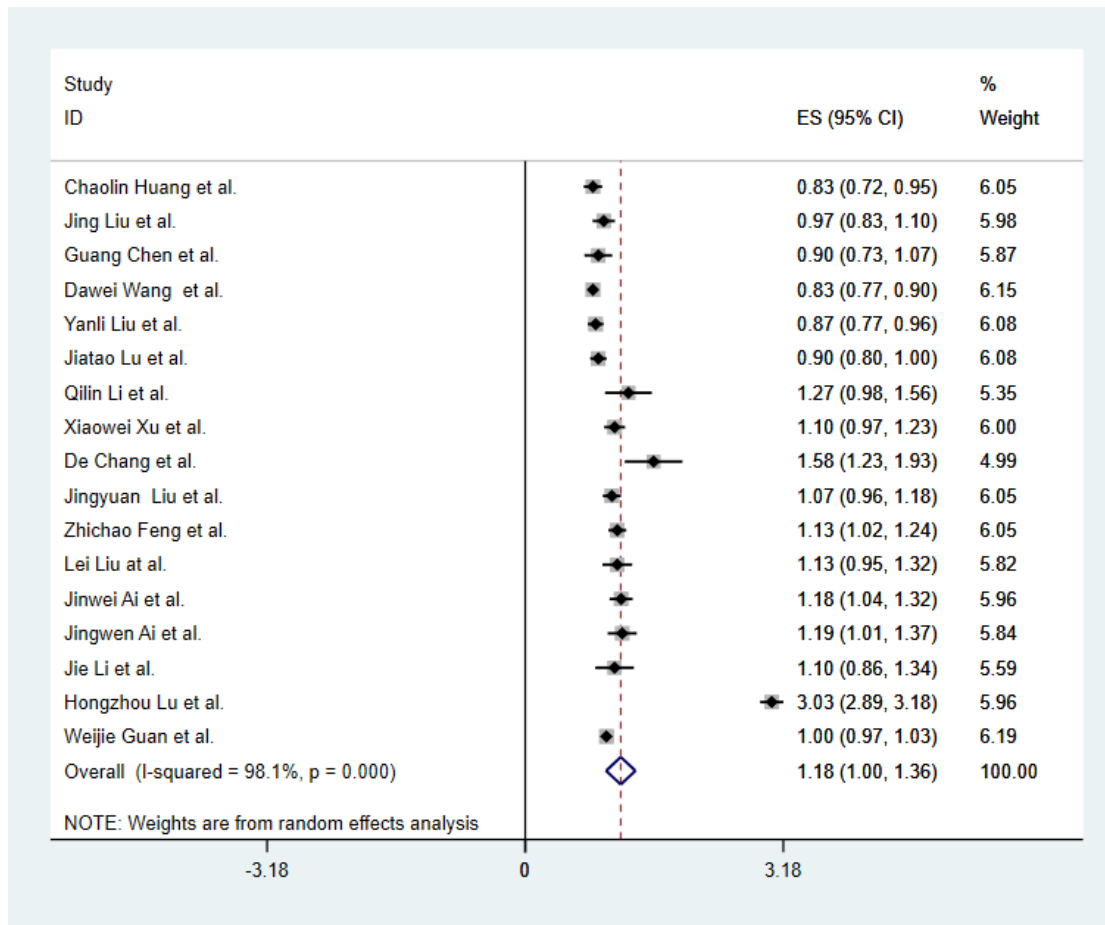

## B. Wuhan

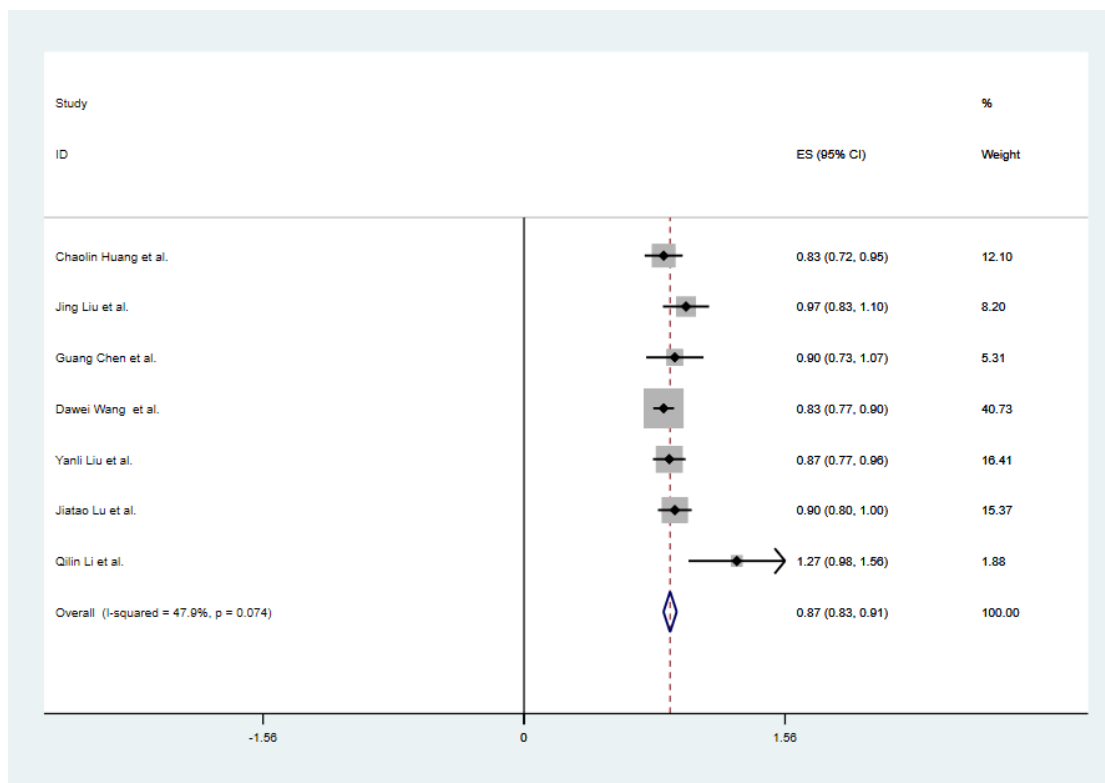

## C. Outside Wuhan

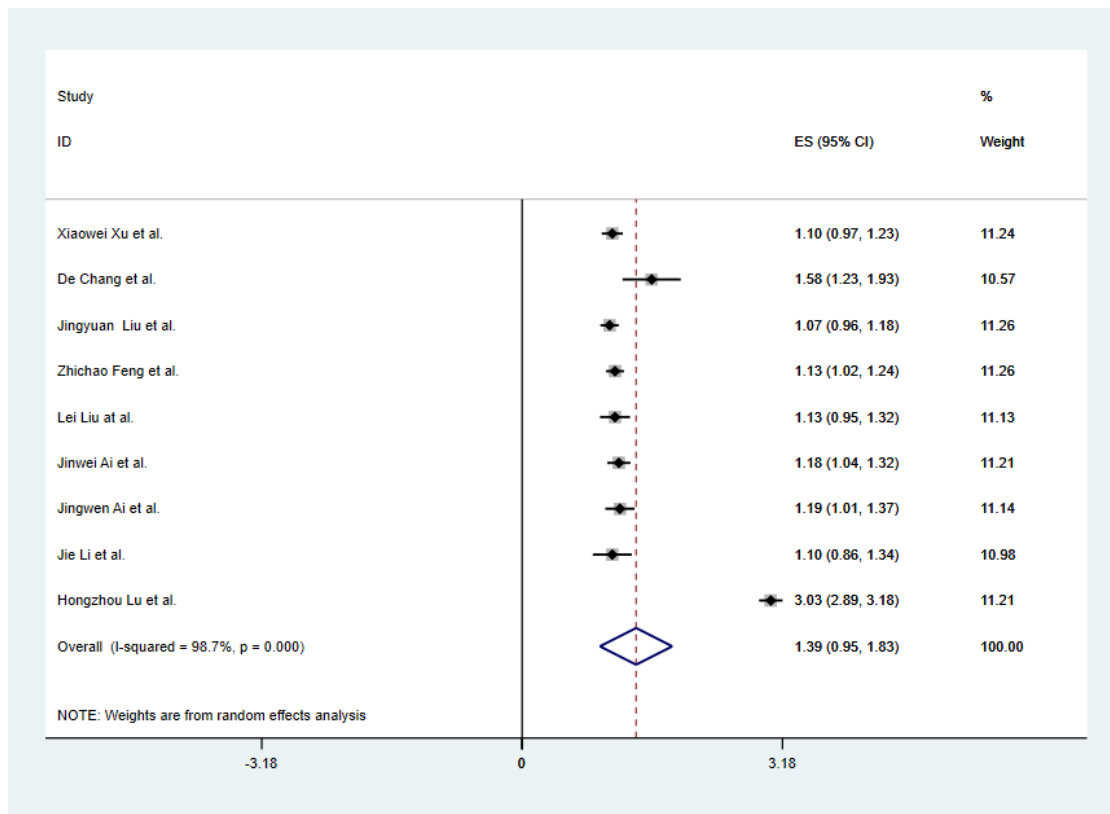

#### D. Severe cases

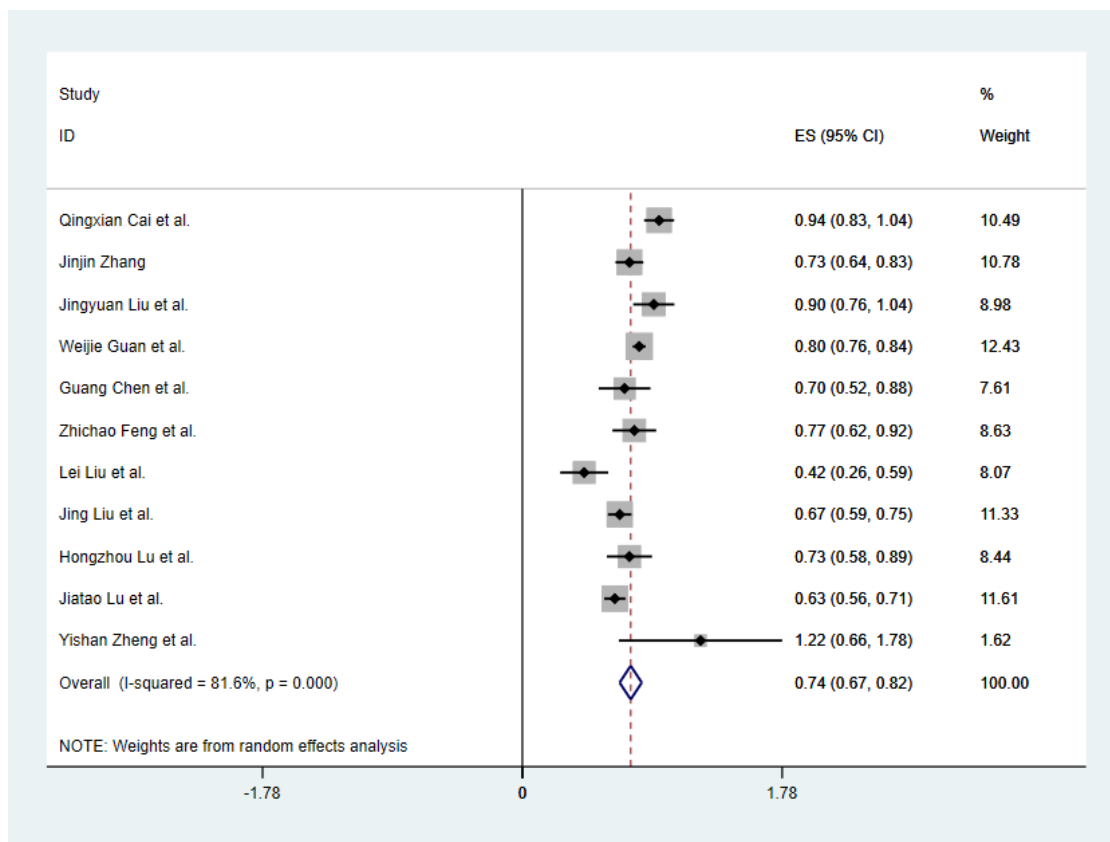

#### F. Non-severe cases



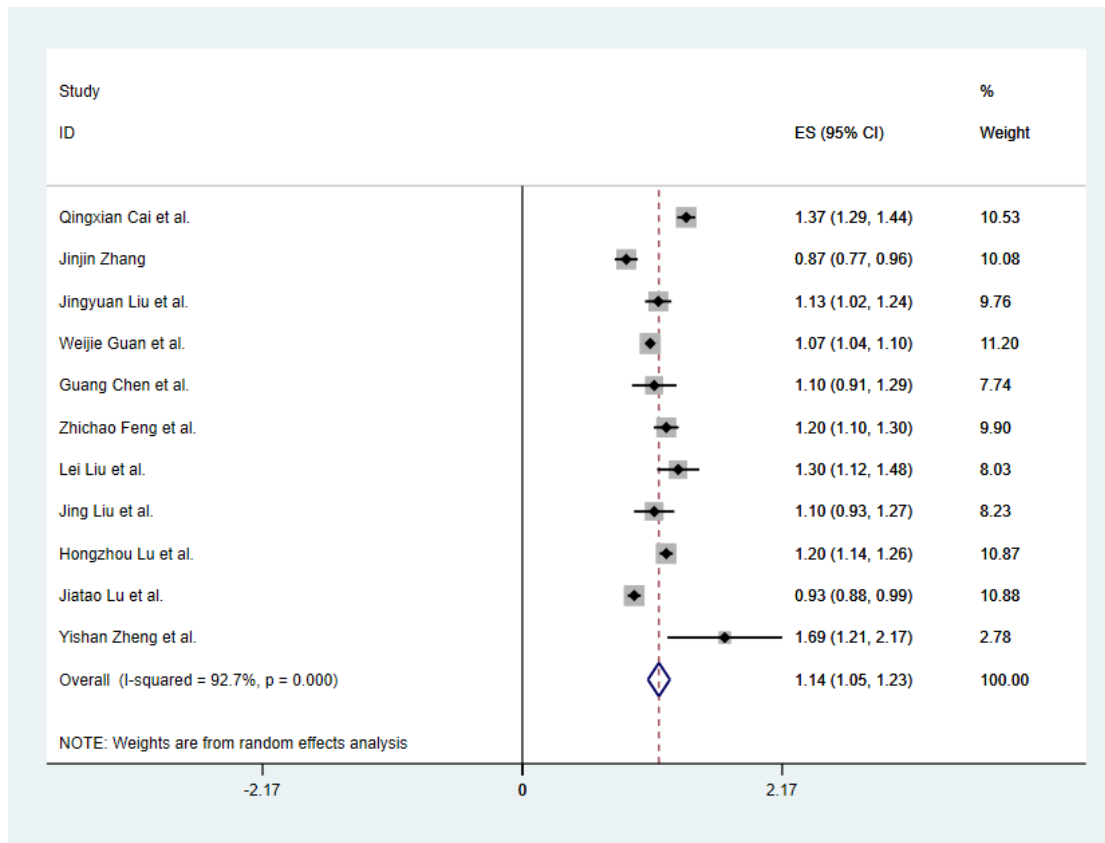

**eFigure 4. 6. Forest plot of M, monocyte count.**

**A. Overall**

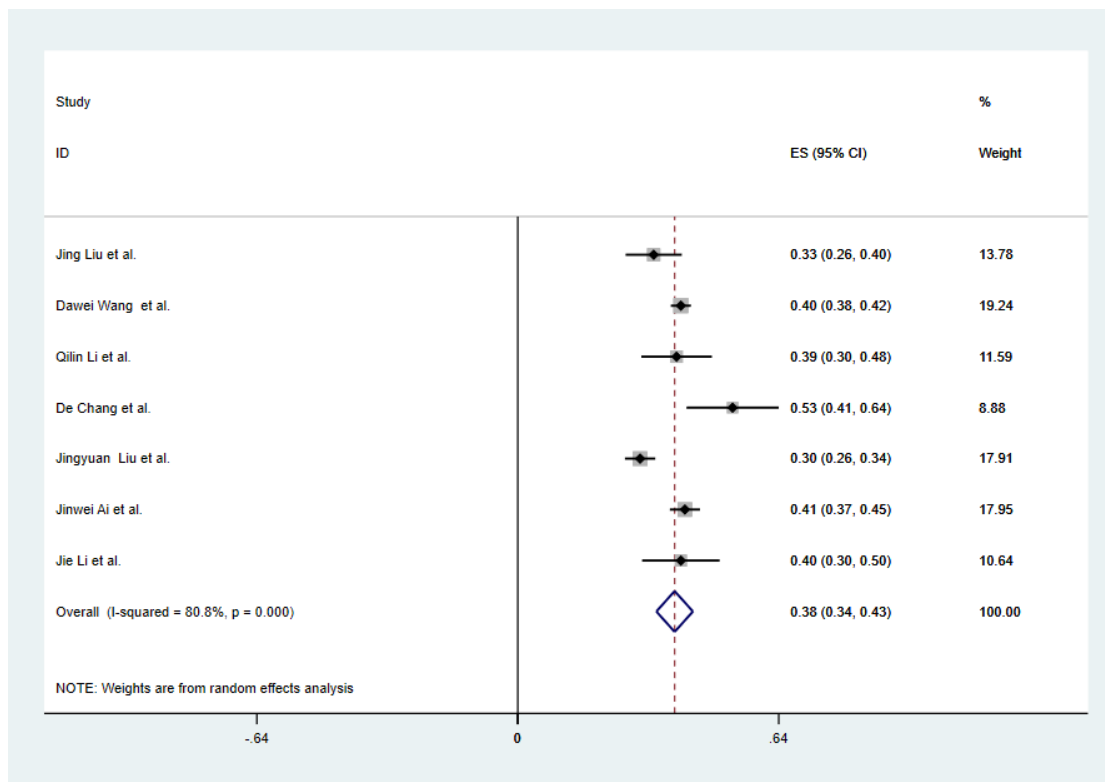

**B. Wuhan**

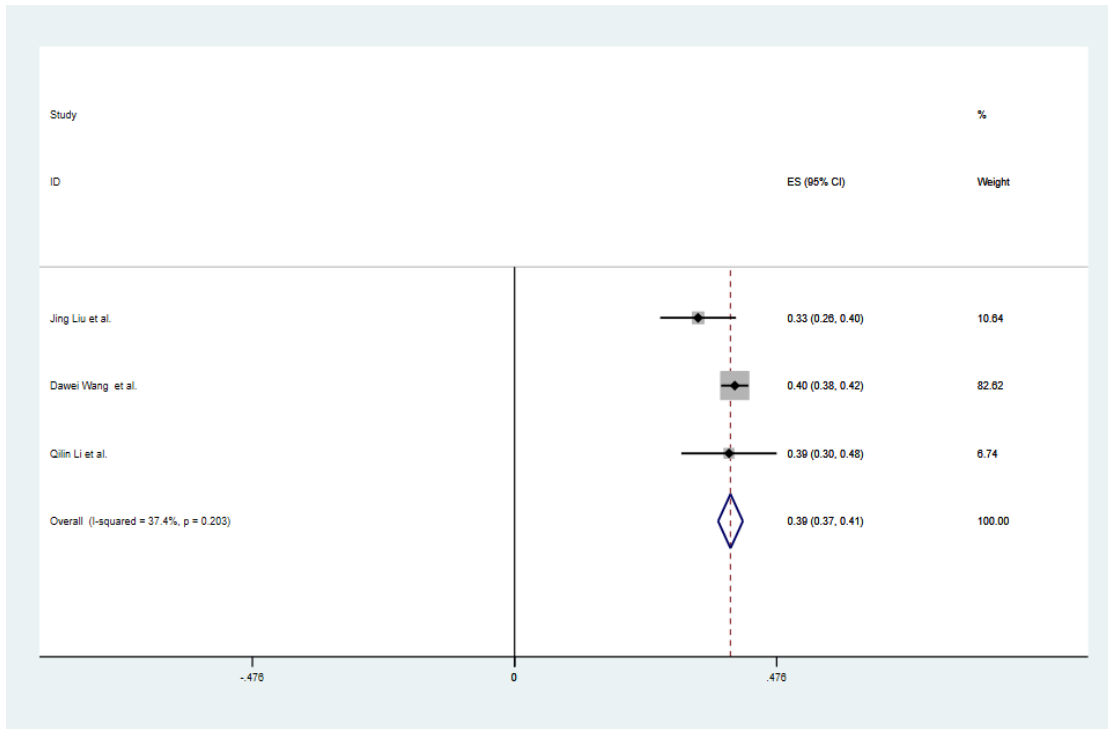

### C. Outside Wuhan

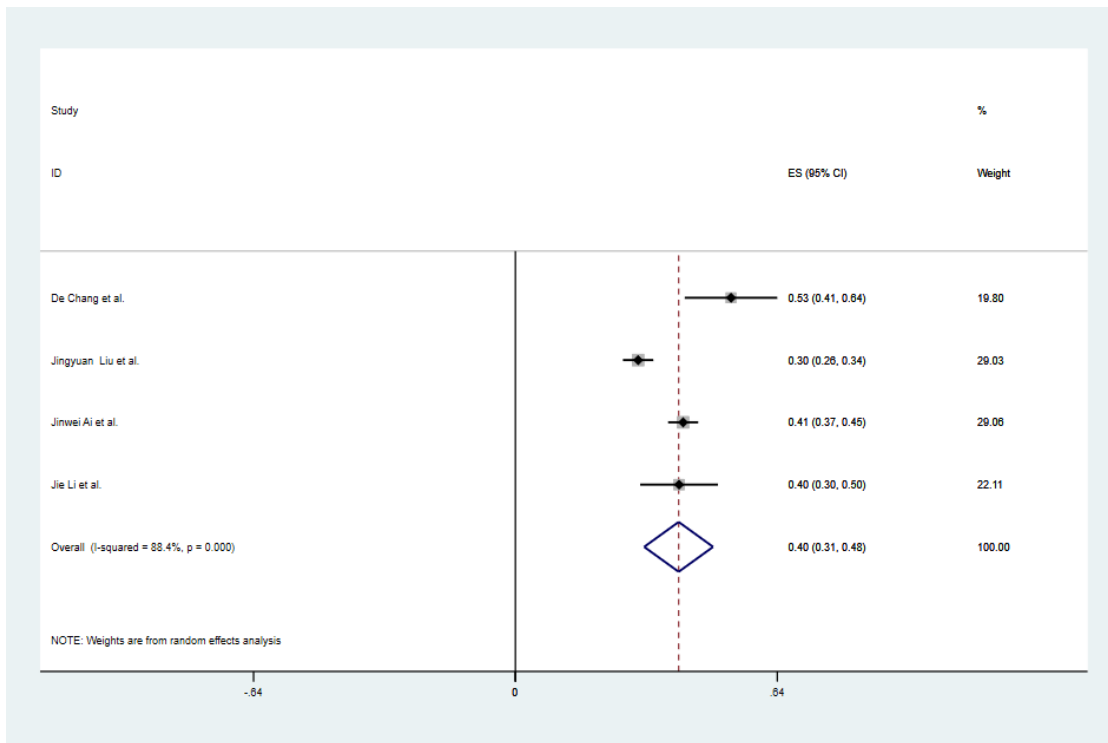

### D. Severe cases

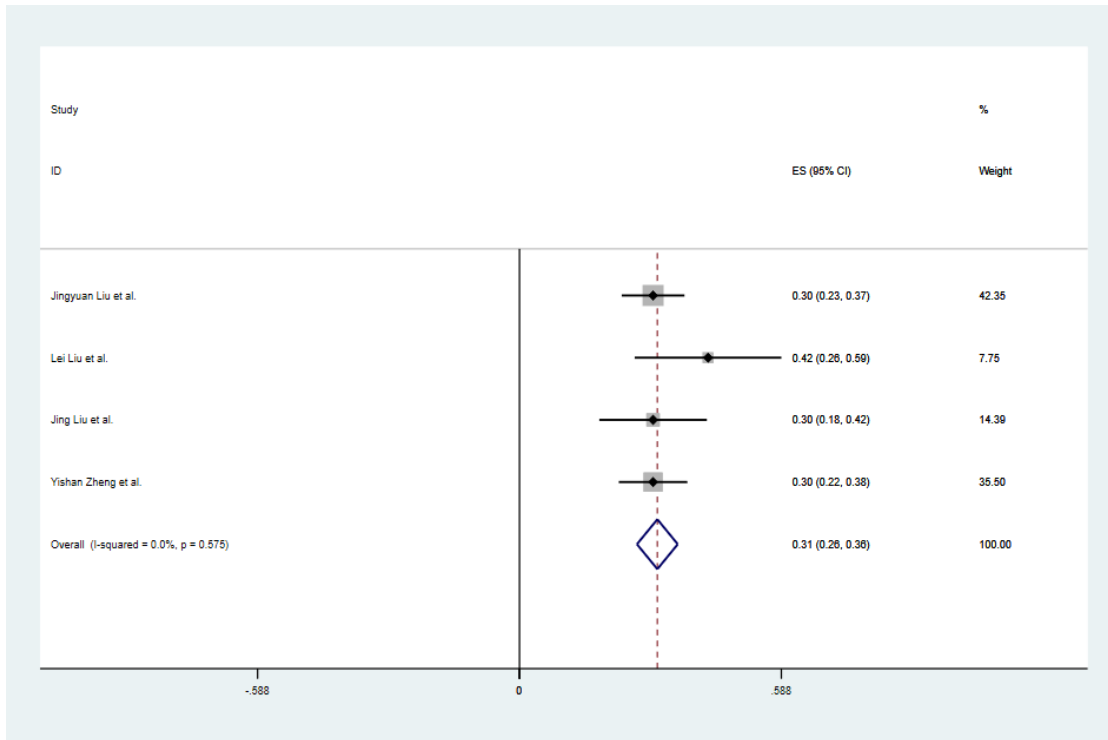

F. Non-severe cases

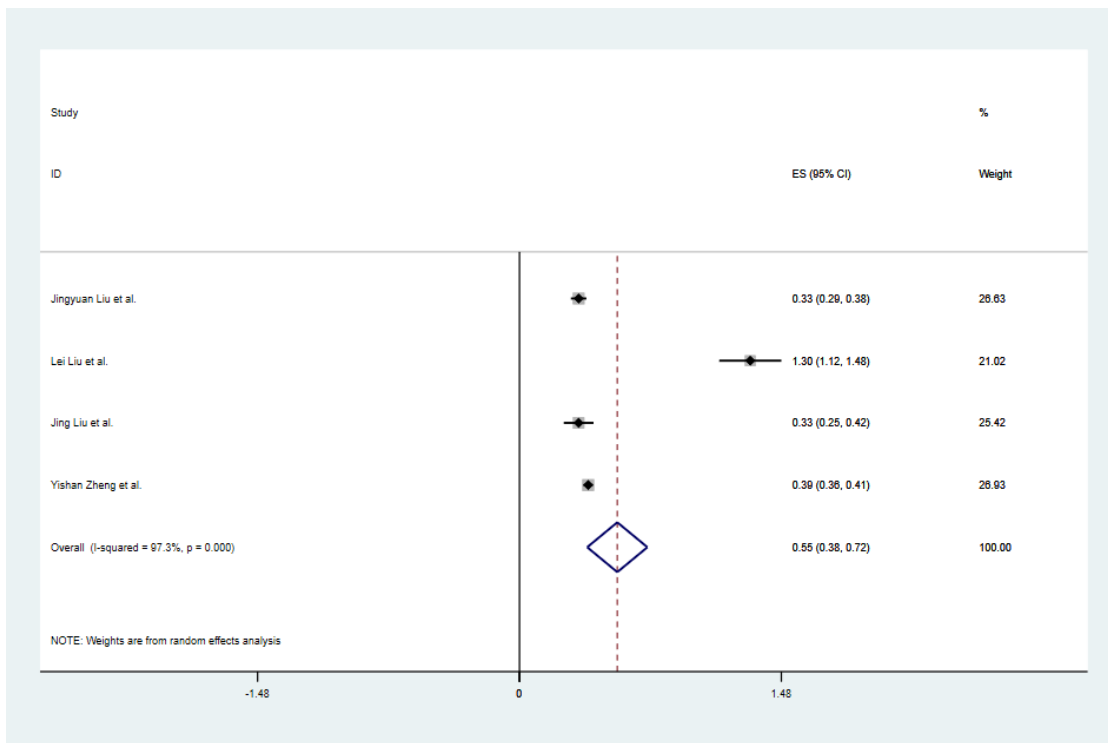

eFigure 4. 7. Forest plot of Hb, hemoglobin.

A. Overall

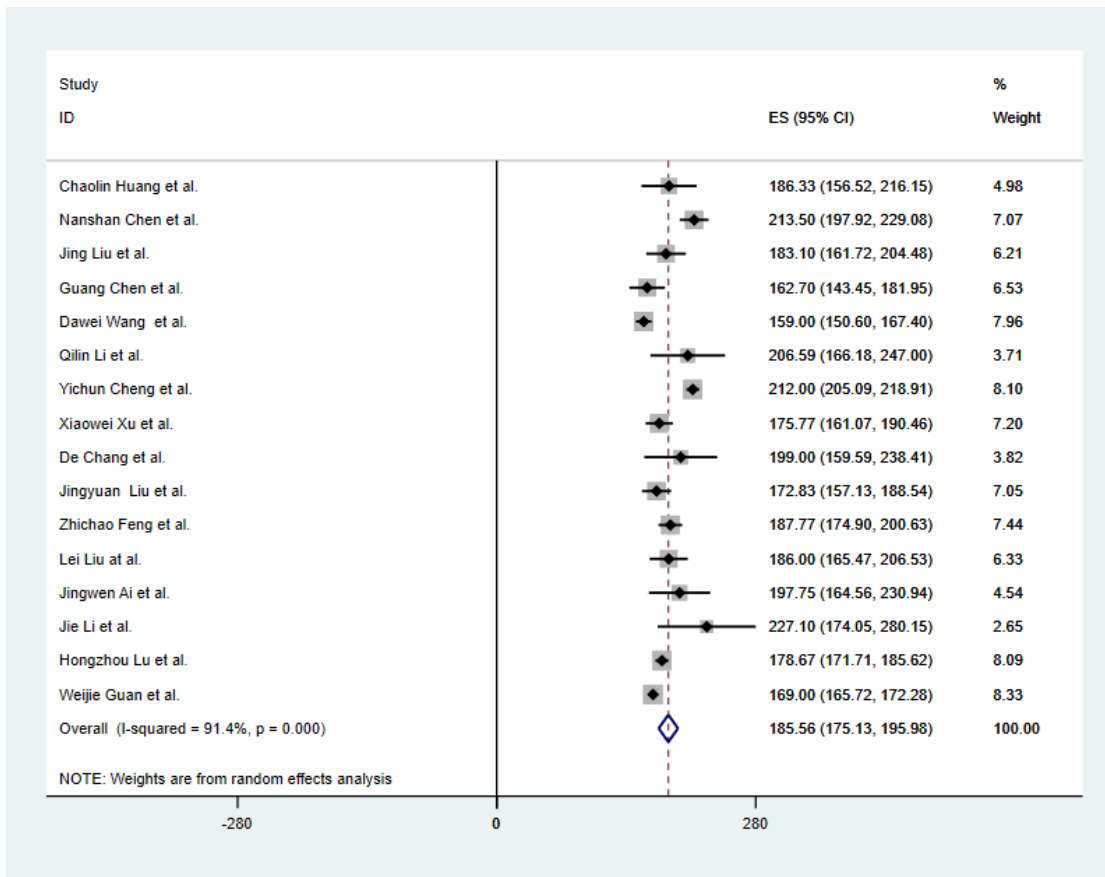

## B. Wuhan

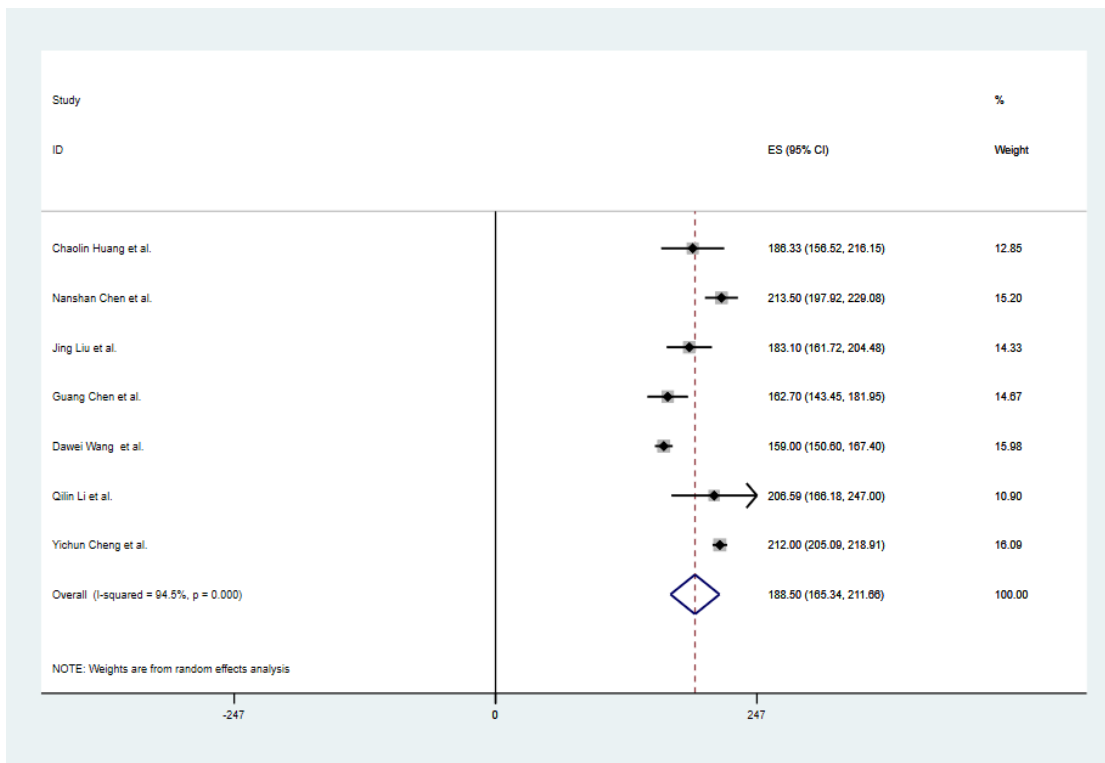

## C. Outside Wuhan

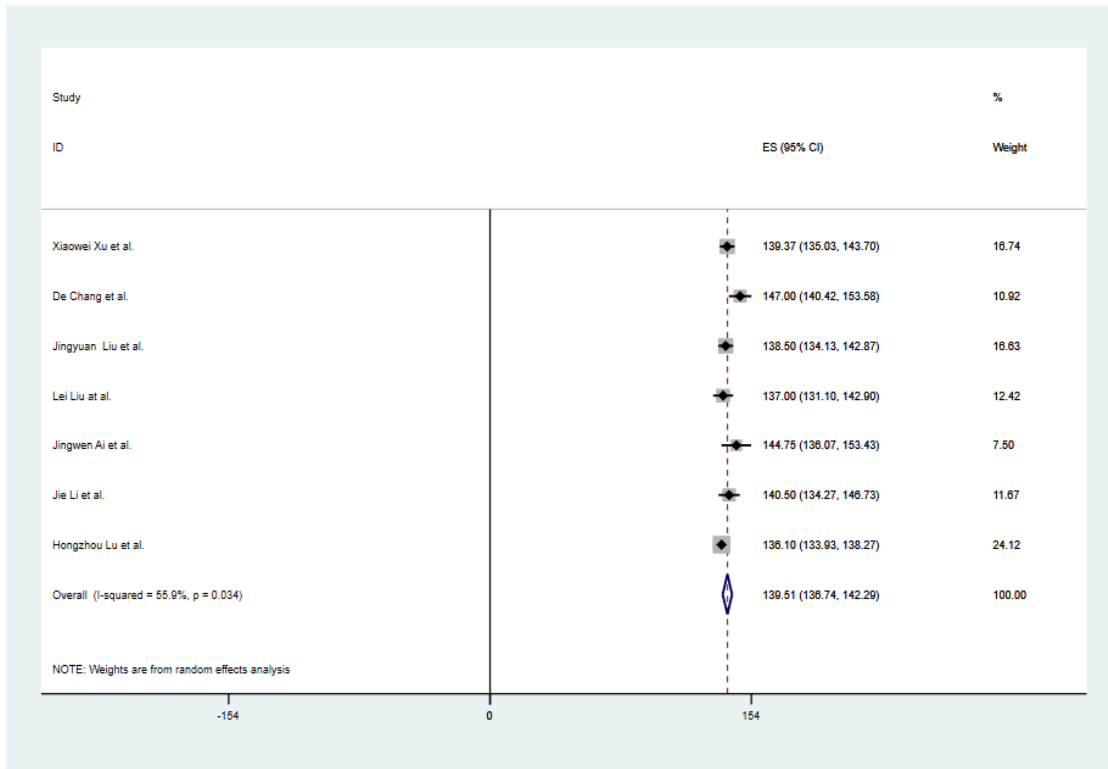

#### D. Severe cases

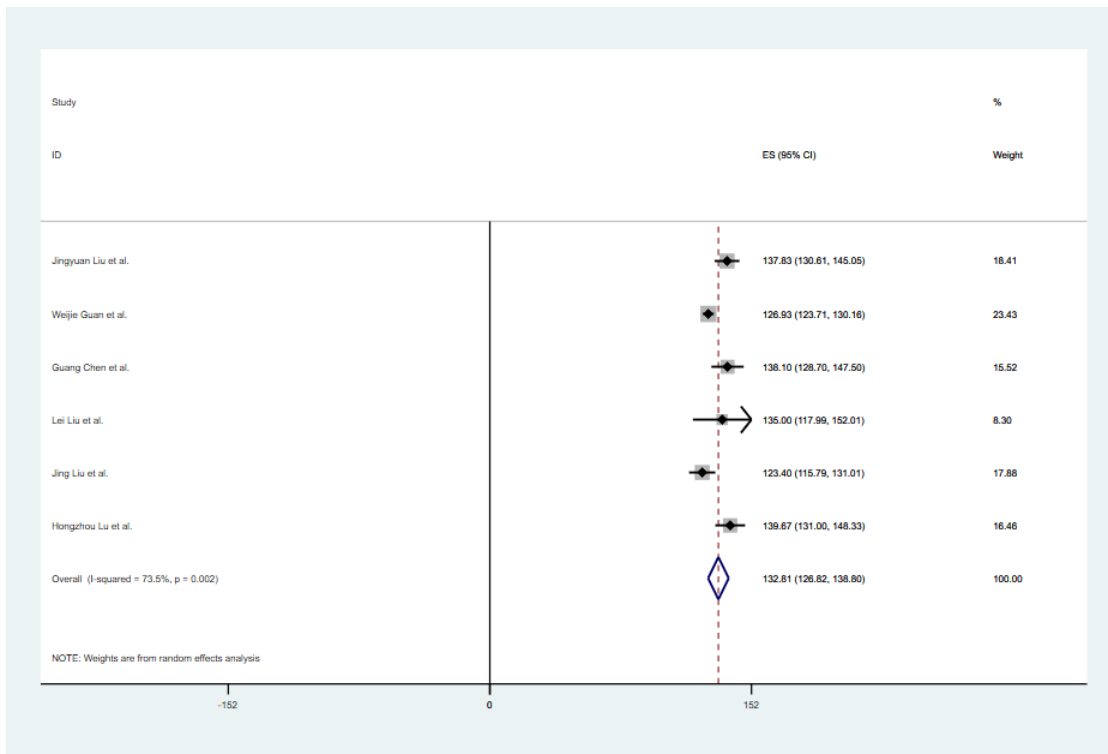

#### F. Non-severe cases

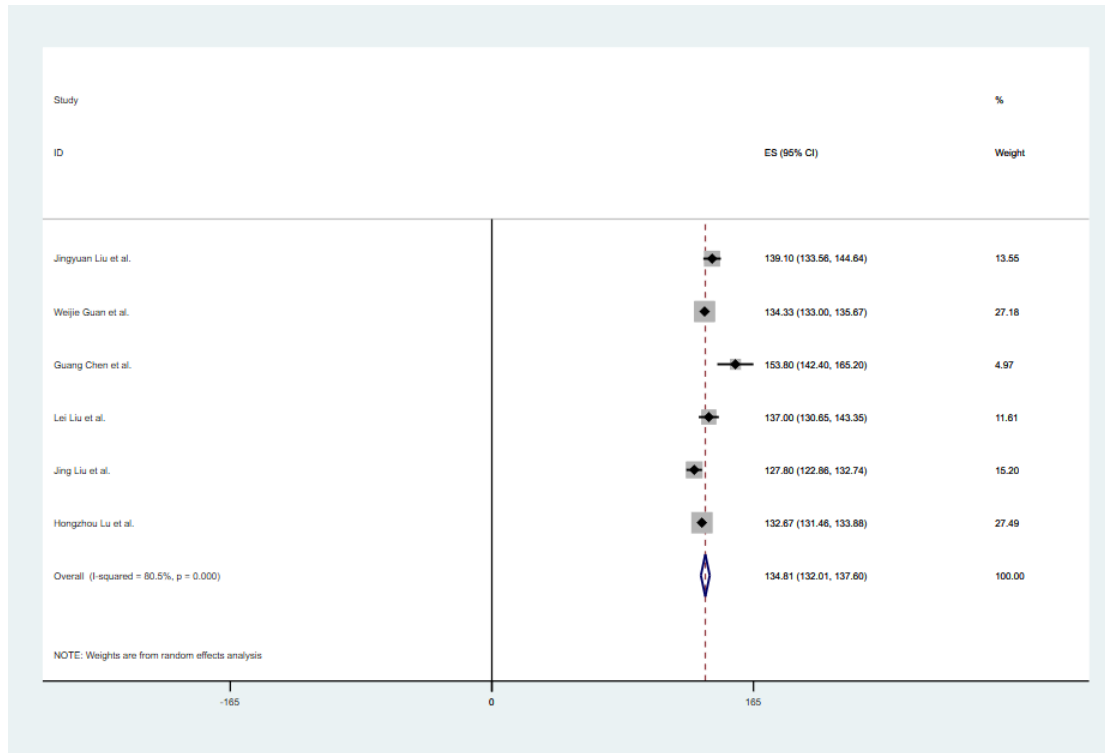

**Figure 4. 8. Forest plot of PLT, platelet count.**

**A. Overall**

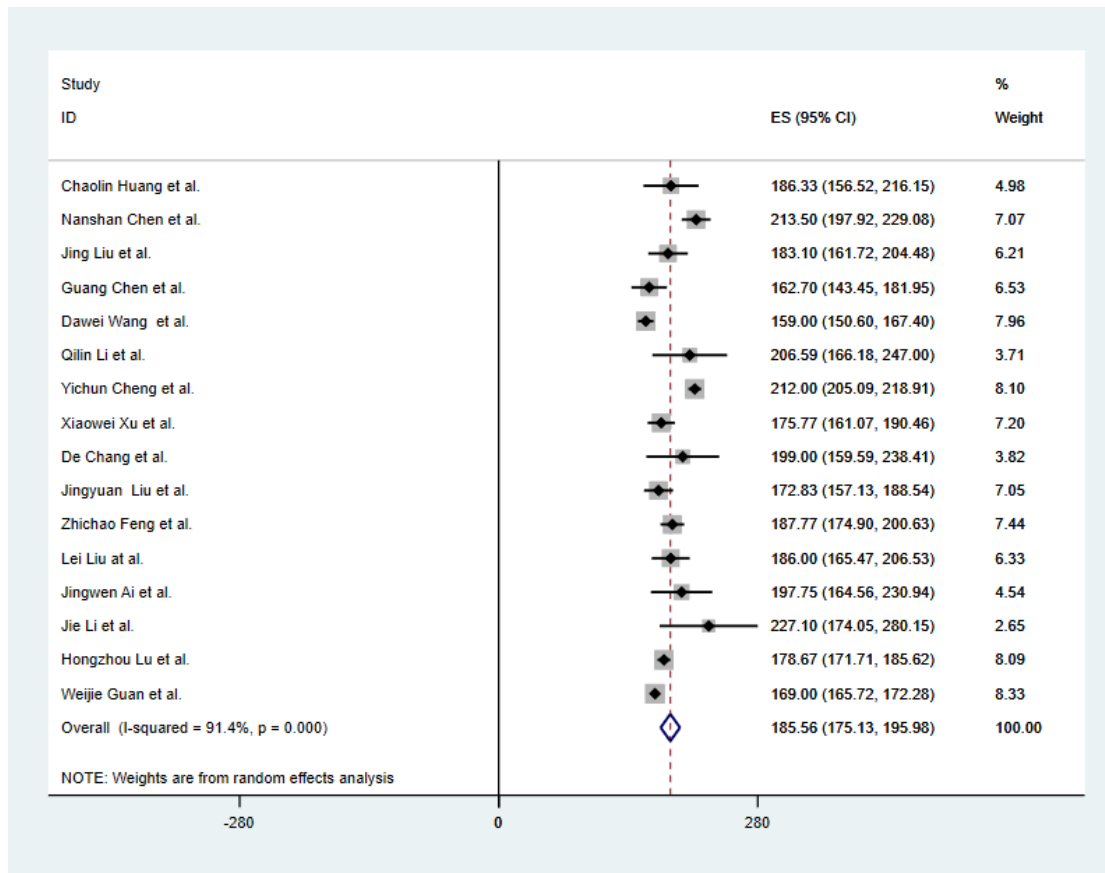

**B. Wuhan**

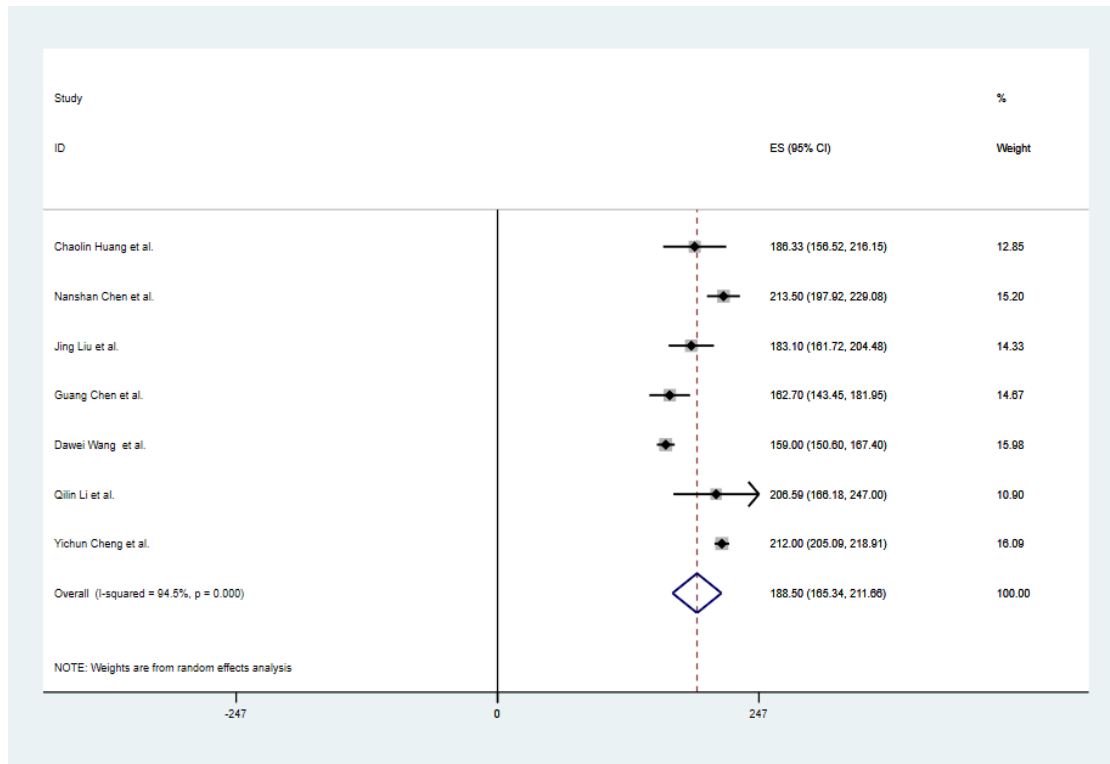

### C. Outside Wuhan

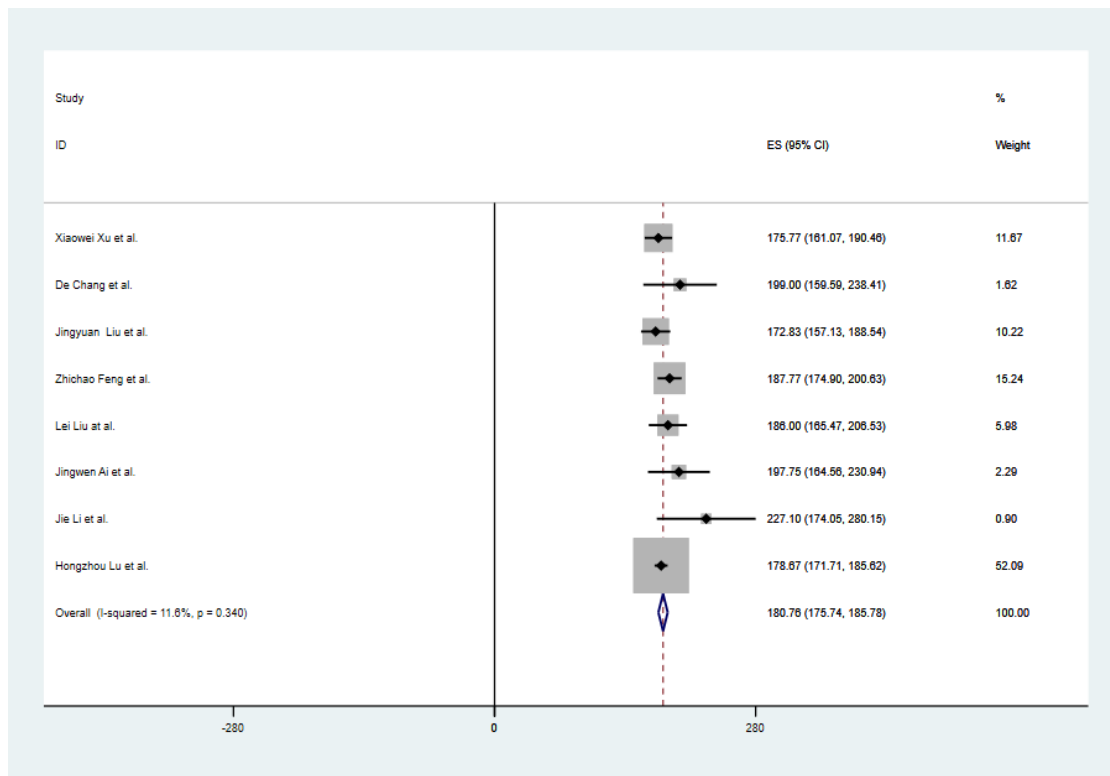

### D. Severe cases

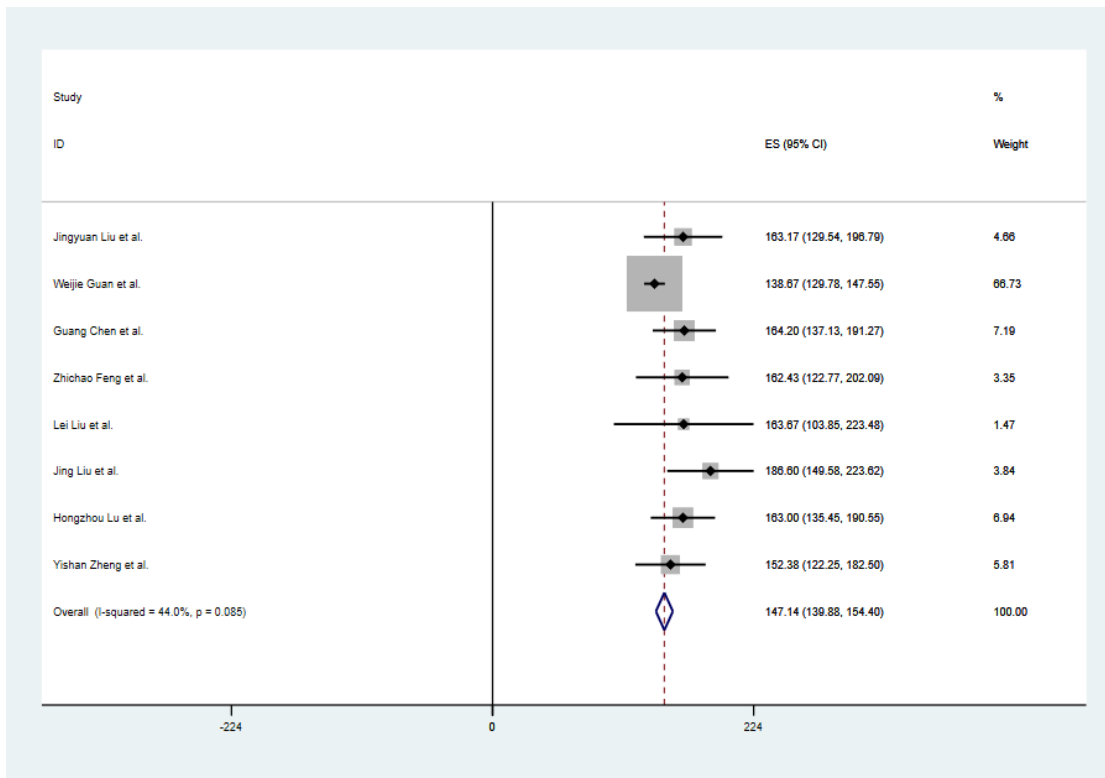

F. Non-severe cases

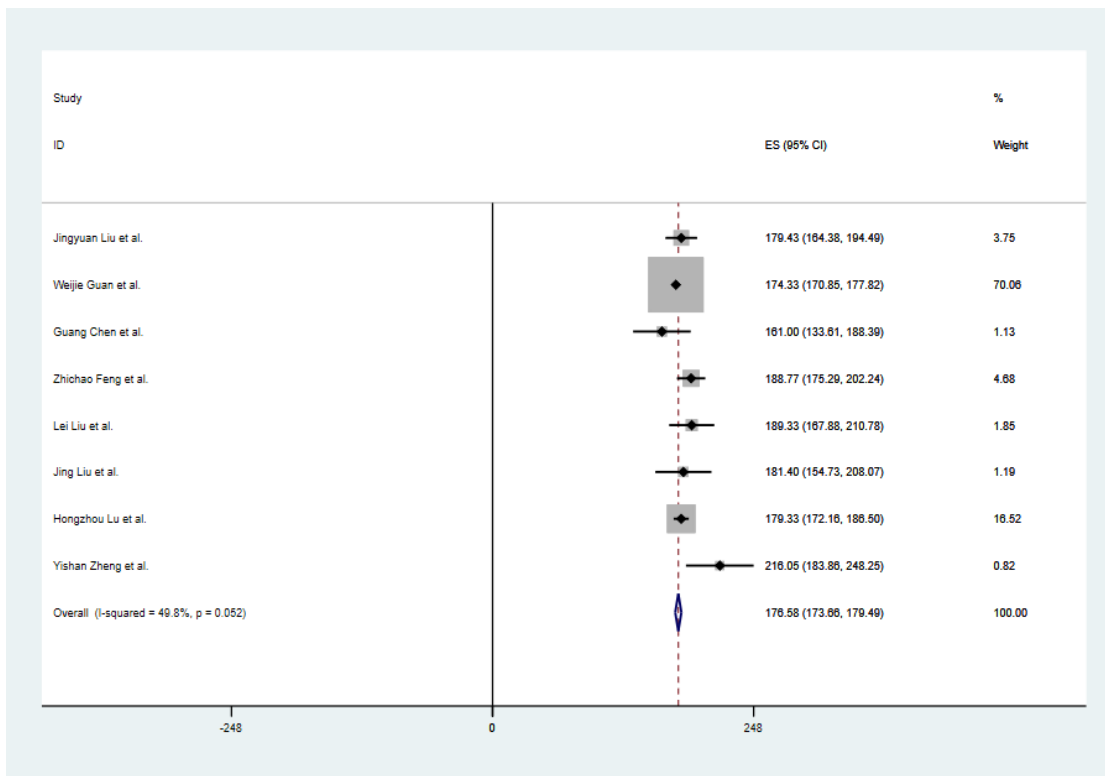

eFigure 4. 9. Forest plot of CRP, C-reactive protein.

A. Overall



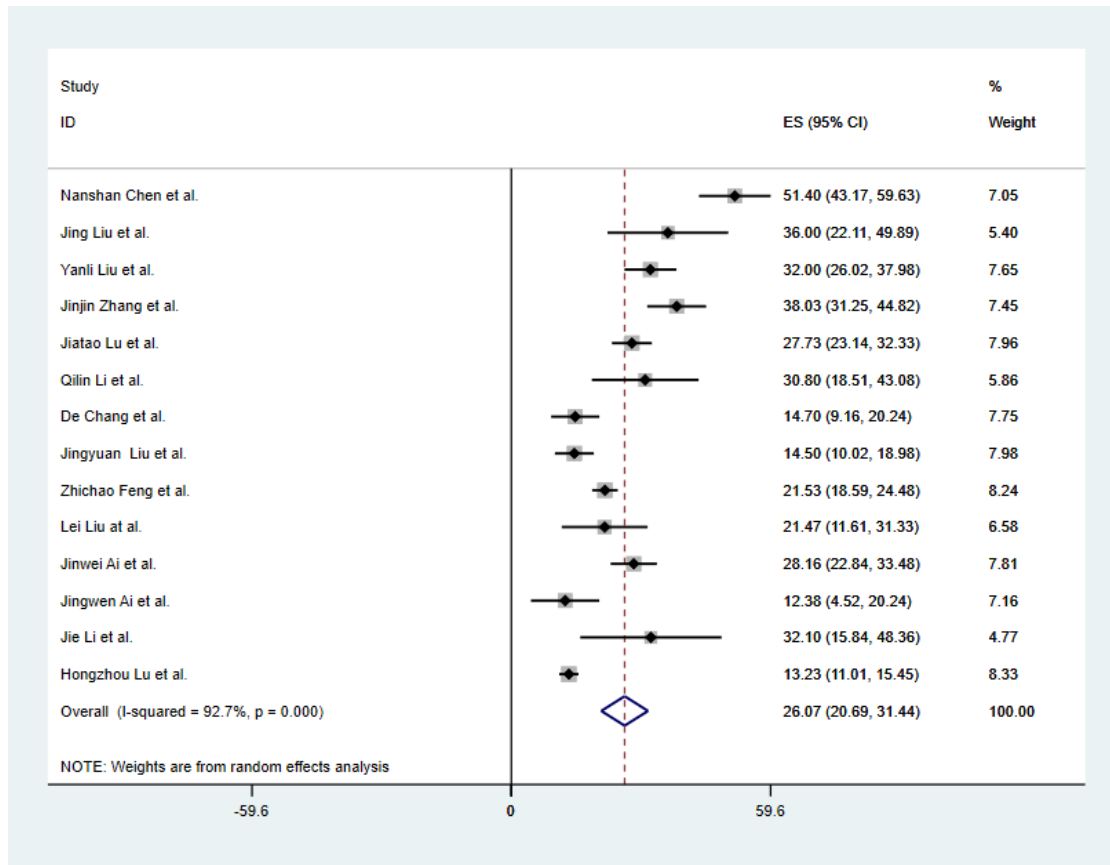

## B. Wuhan

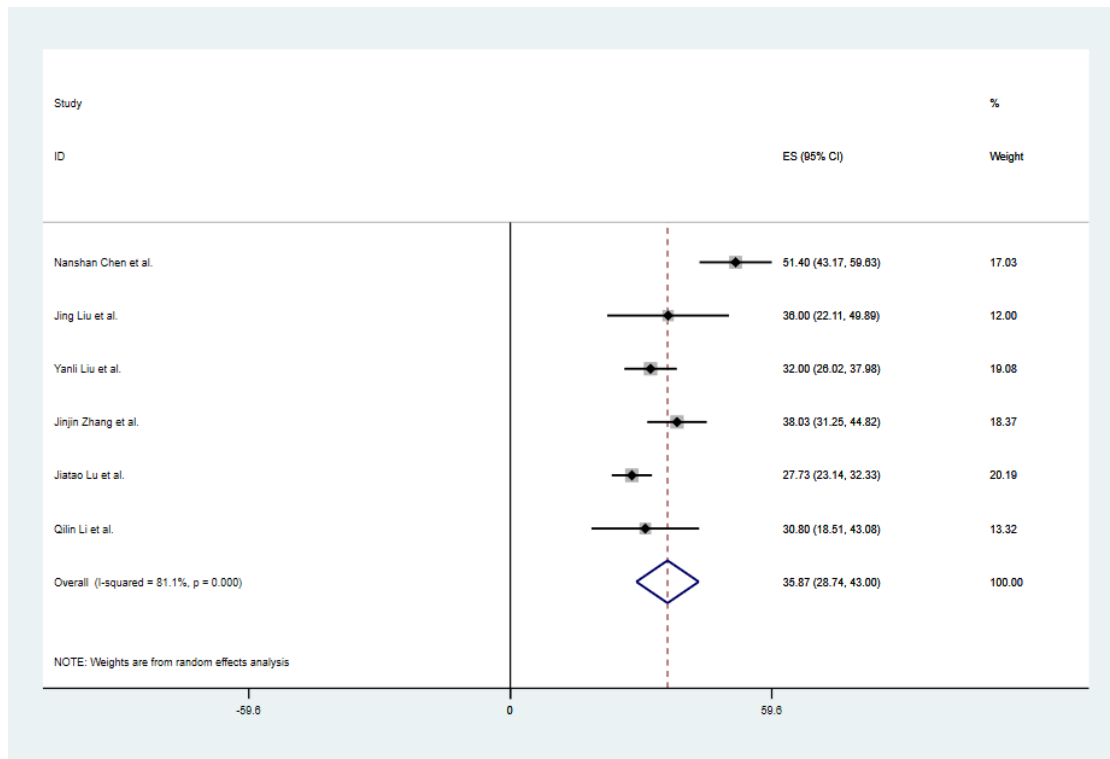

## C. Outside Wuhan

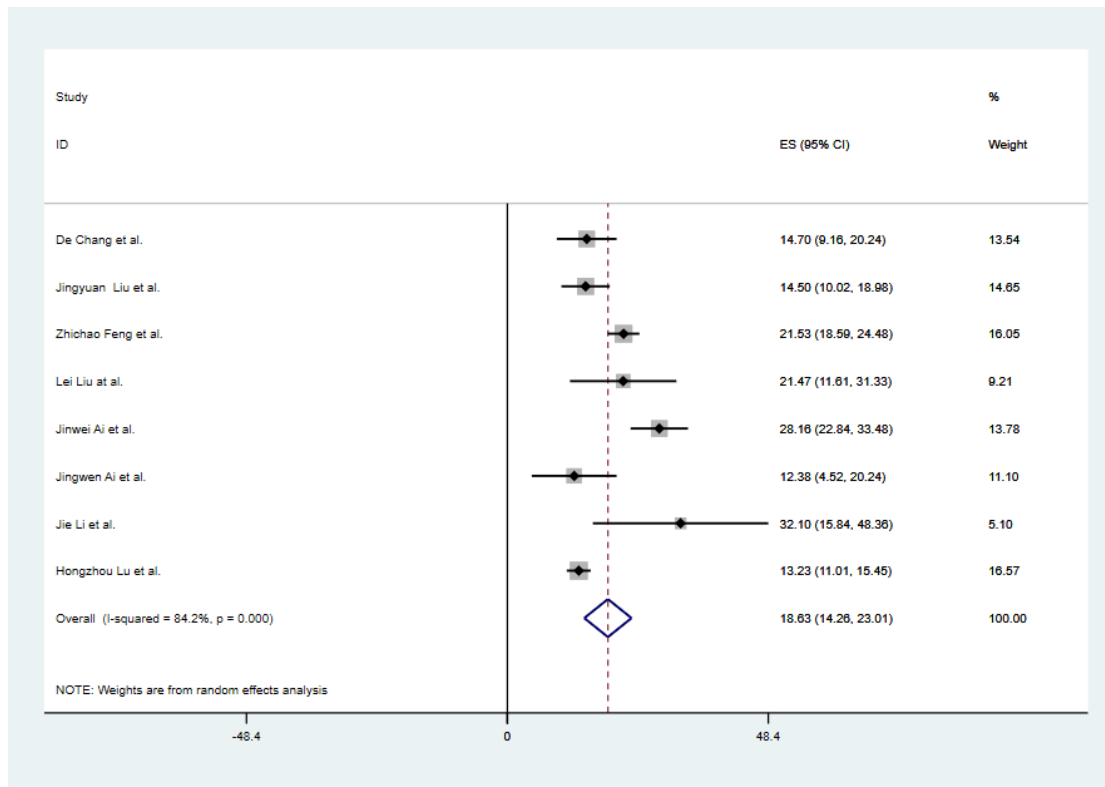

#### D. Severe cases

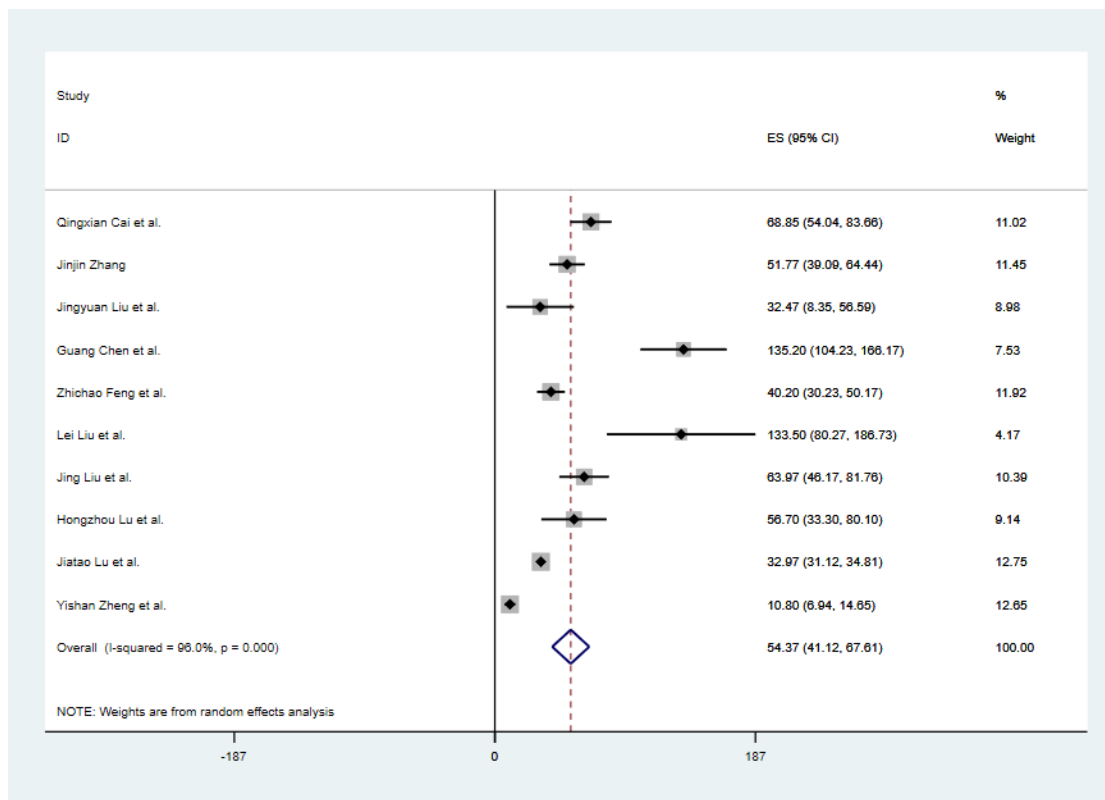

#### E. Non-severe cases

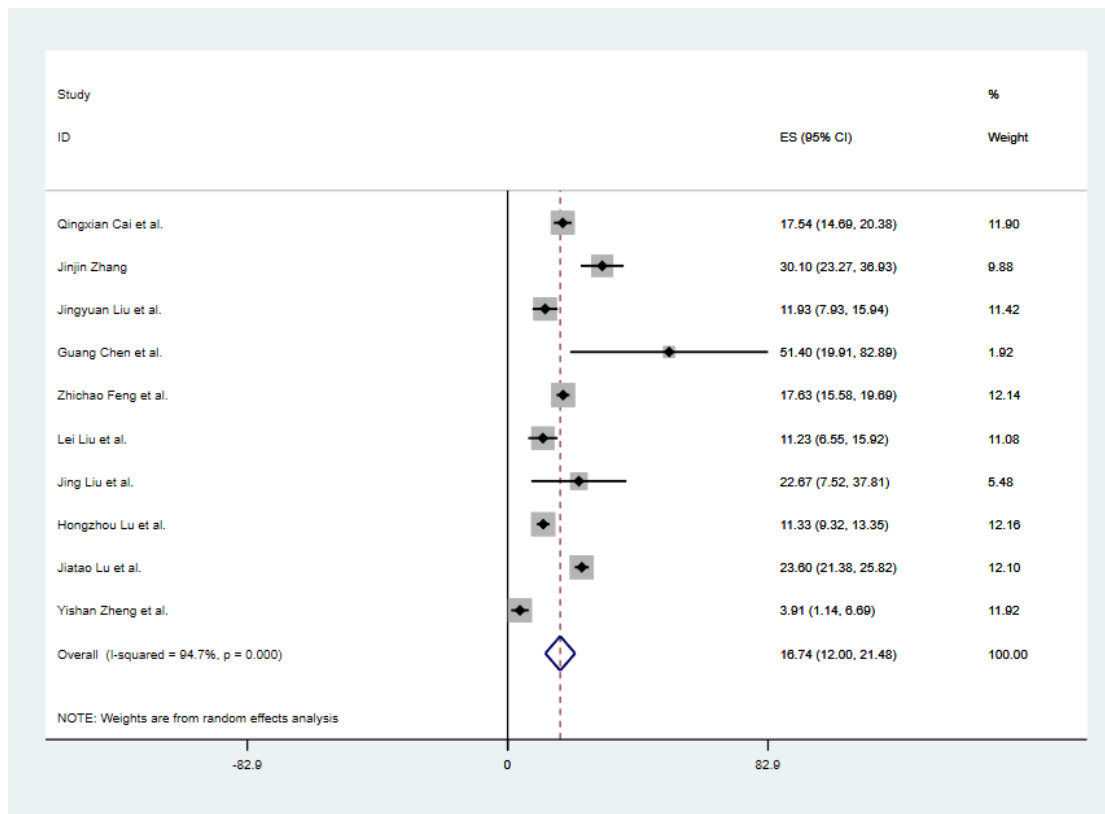

**eFigure 4. 10. Forest plot of PCT, procalcitonin.**

**A. Overall**

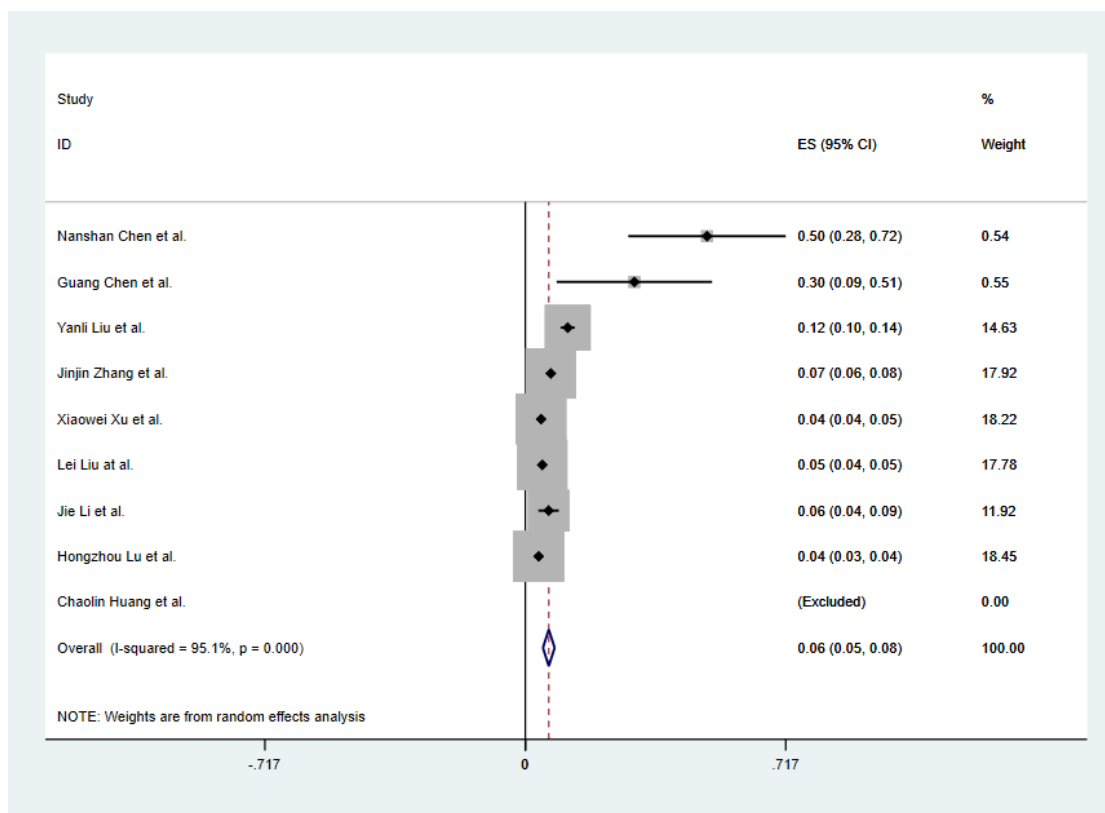

**B. Wuhan**

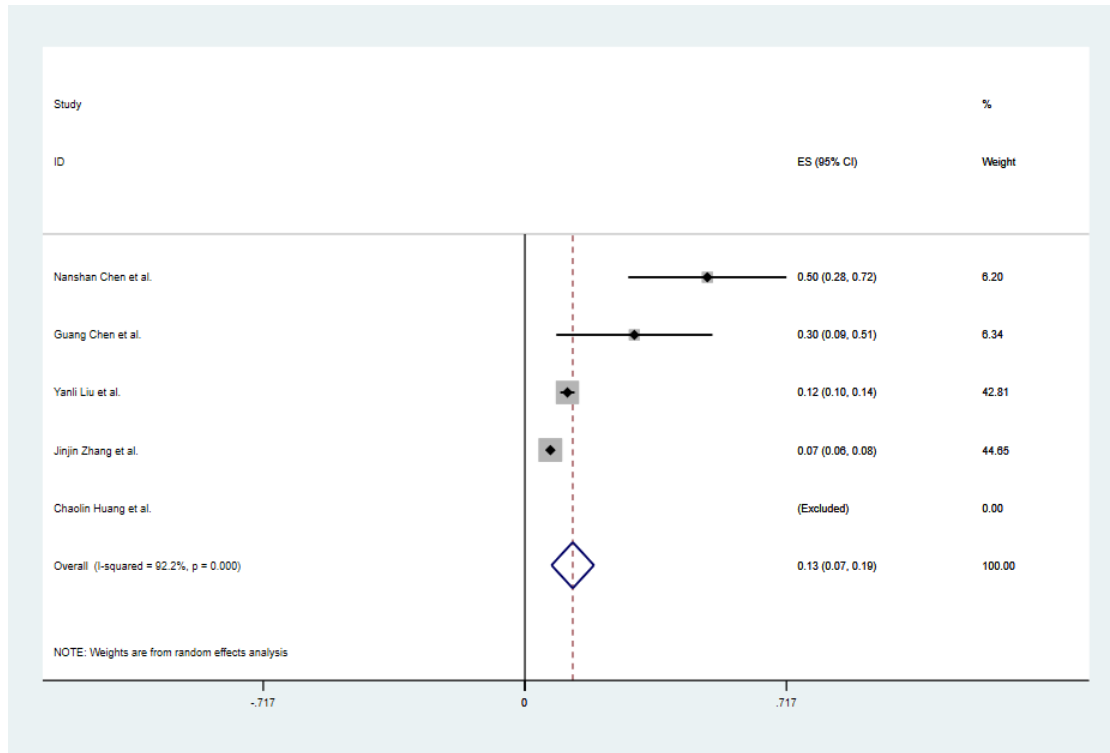

### C. Outside Wuhan

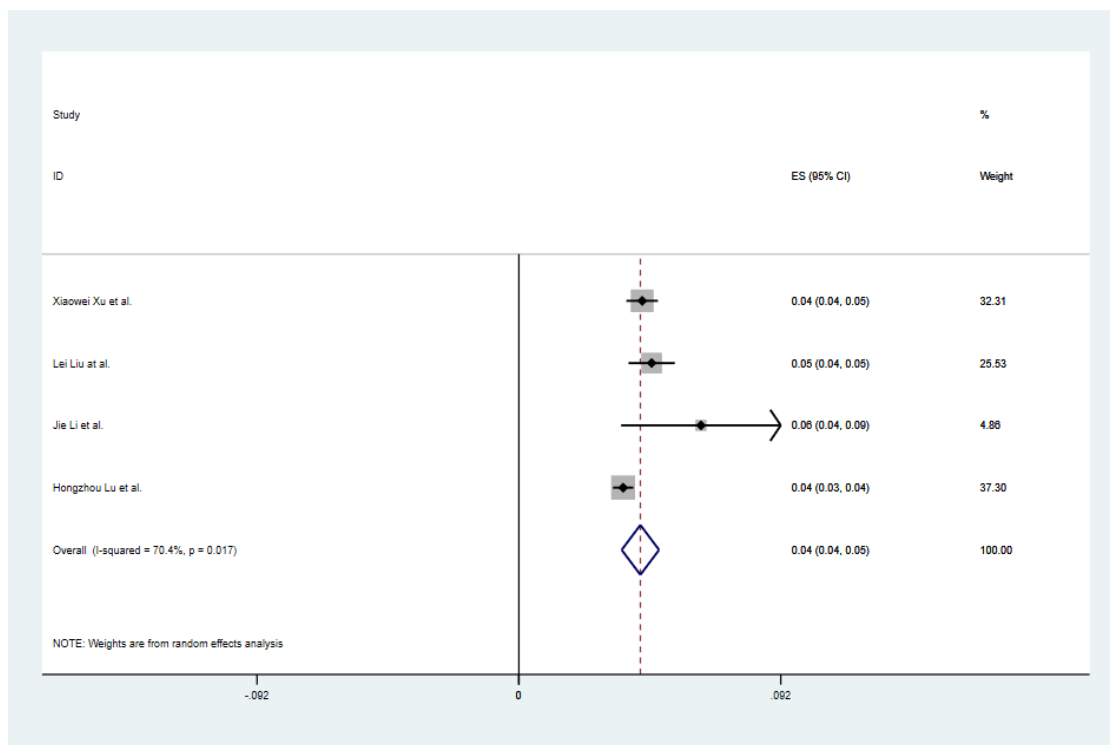

### D. Severe cases

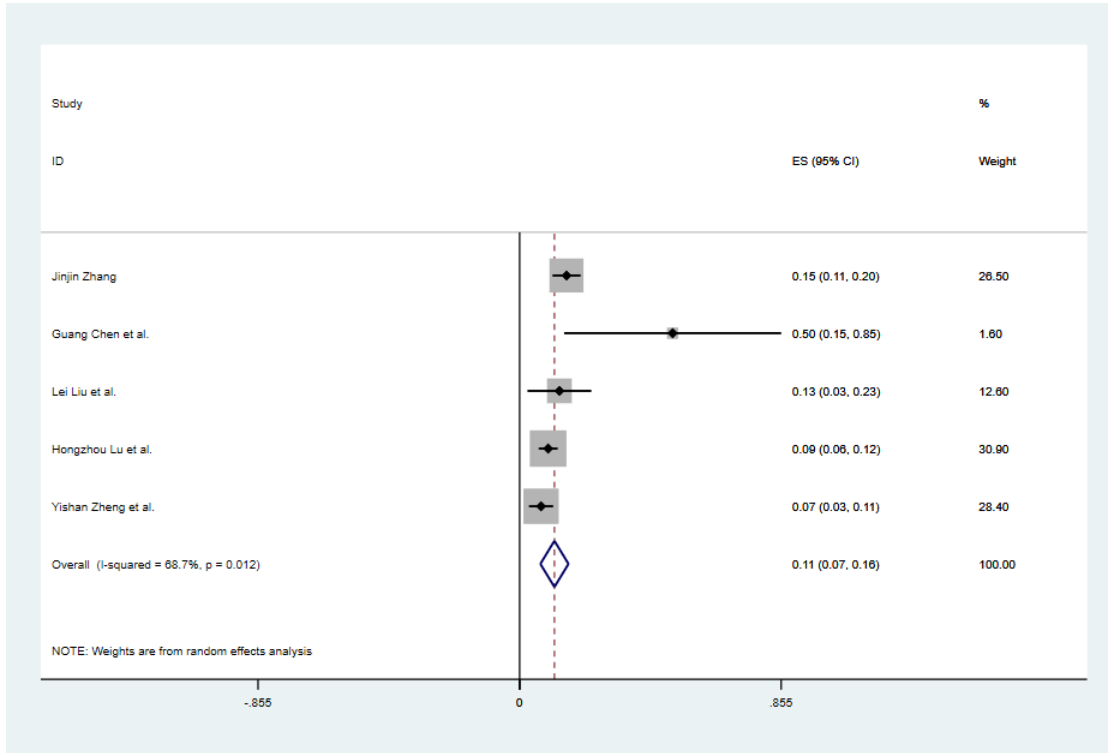

E. Non-severe cases

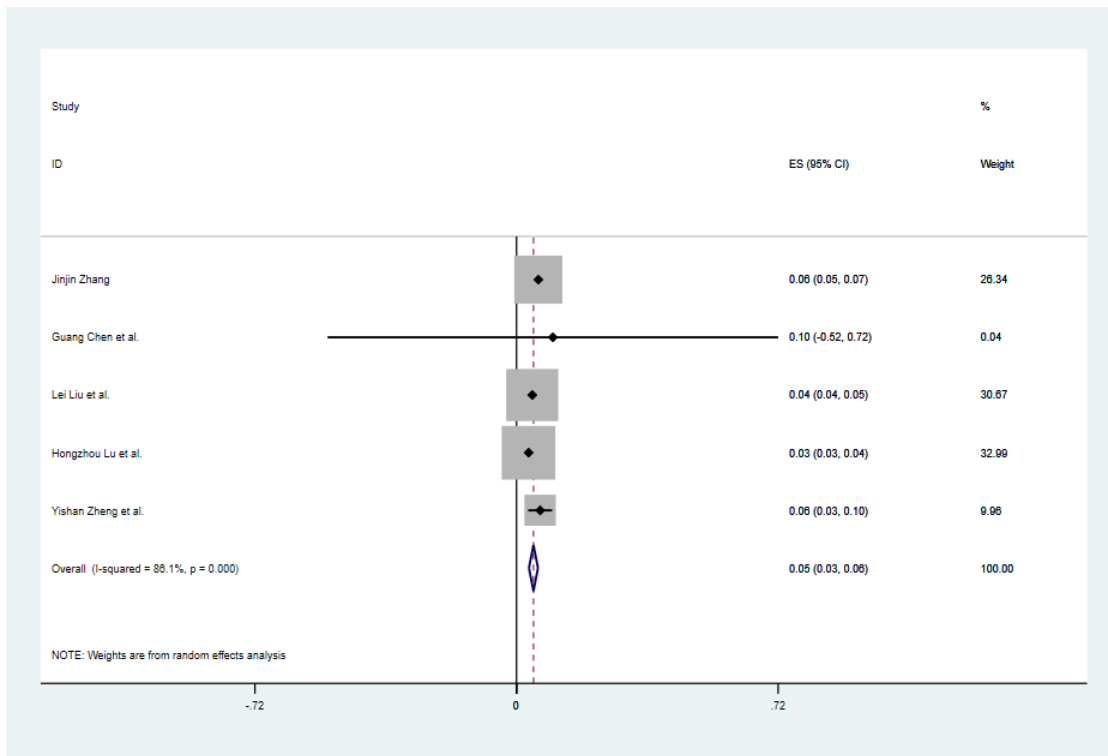

**eFigure 4. 11. Forest plot of LDH, lactate dehydrogenase.**

A. Overall

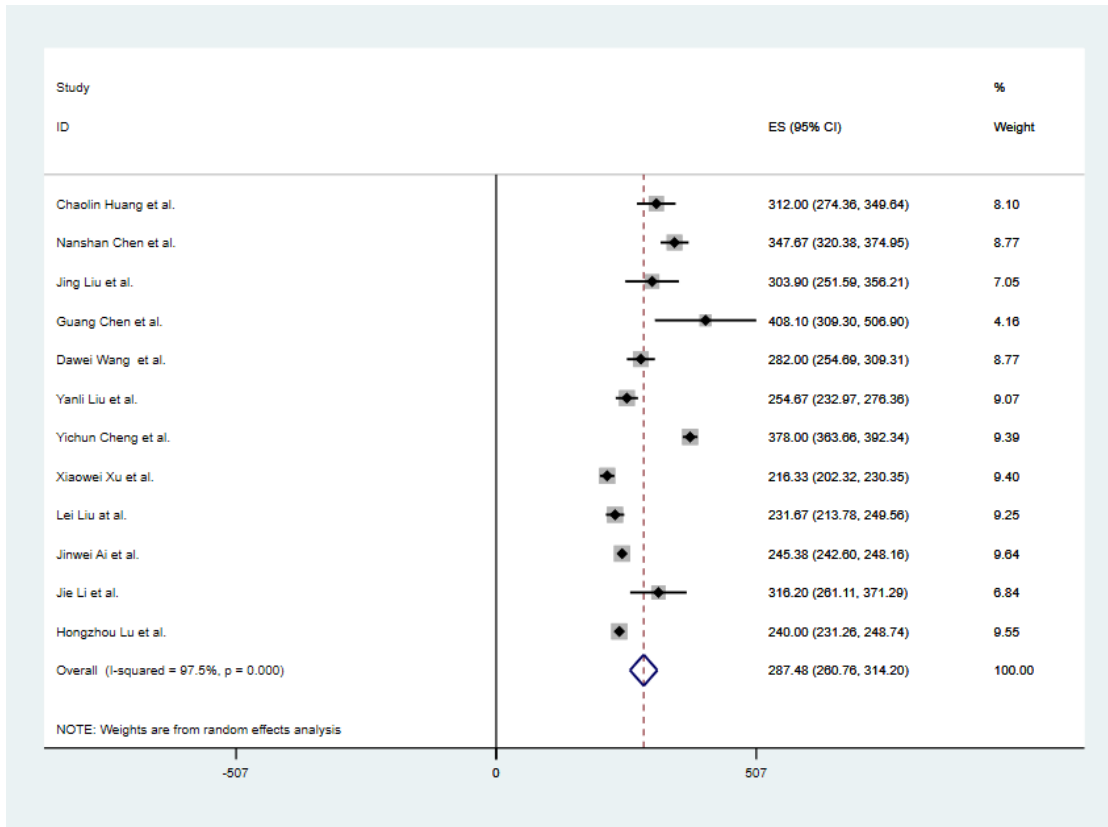

## B. Wuhan

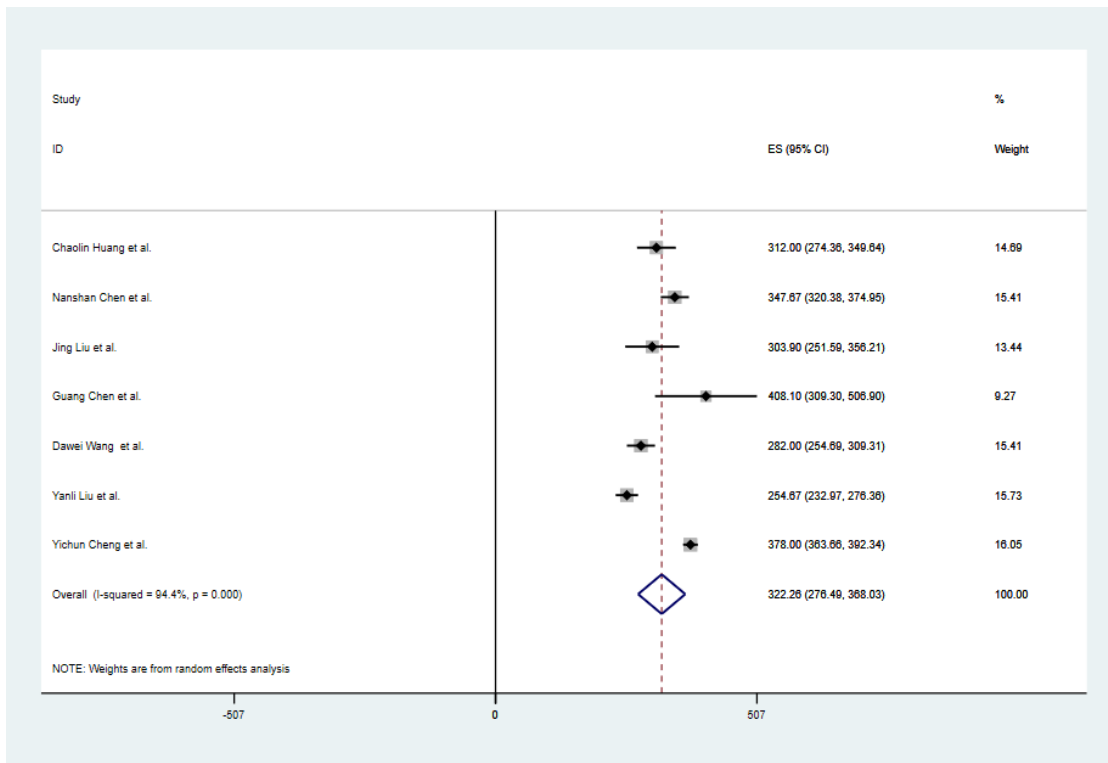

## C. Outside Wuhan

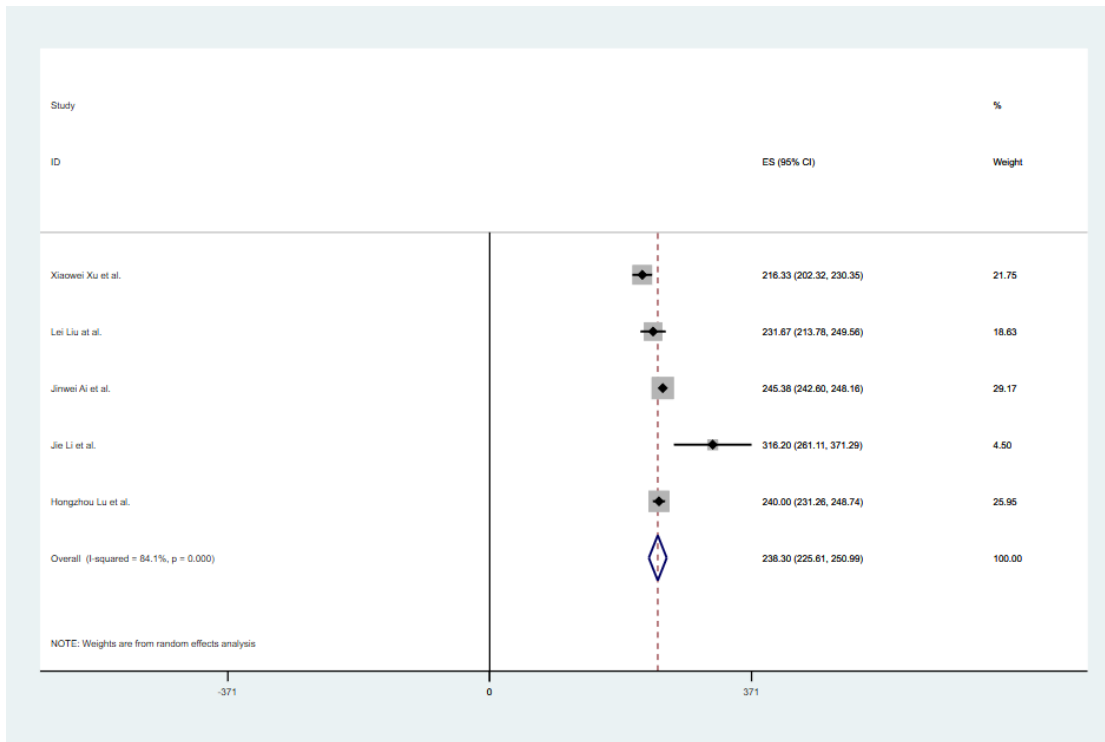

#### D. Severe cases

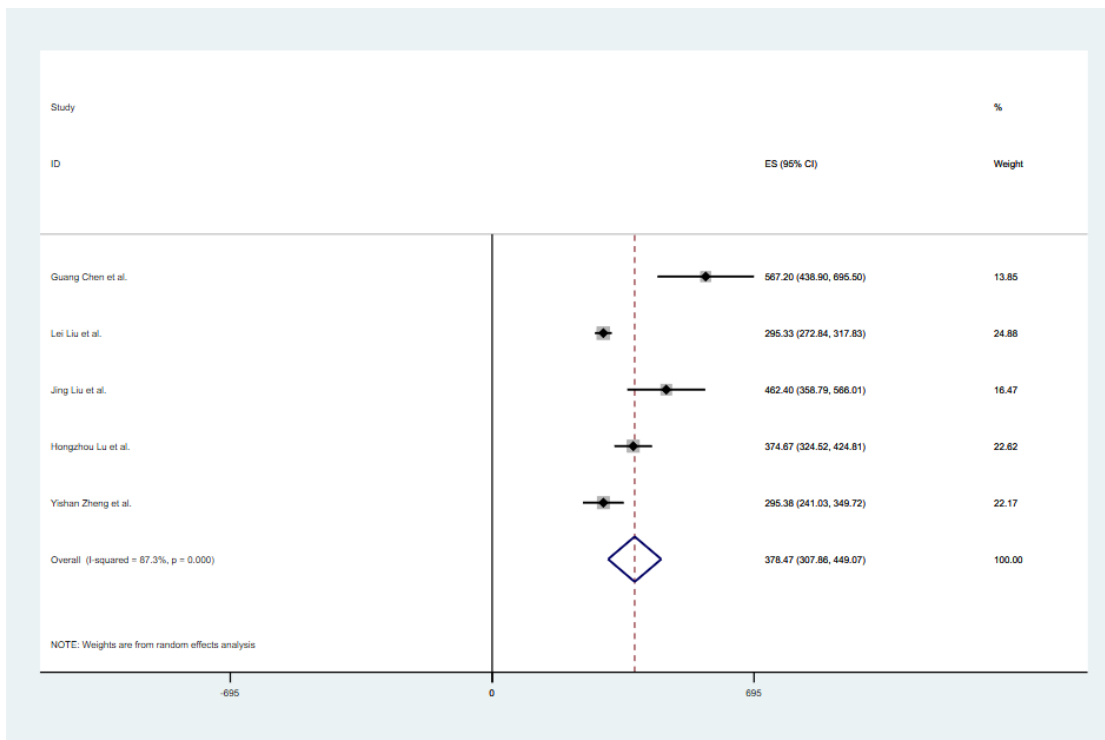

#### E. Non-severe cases

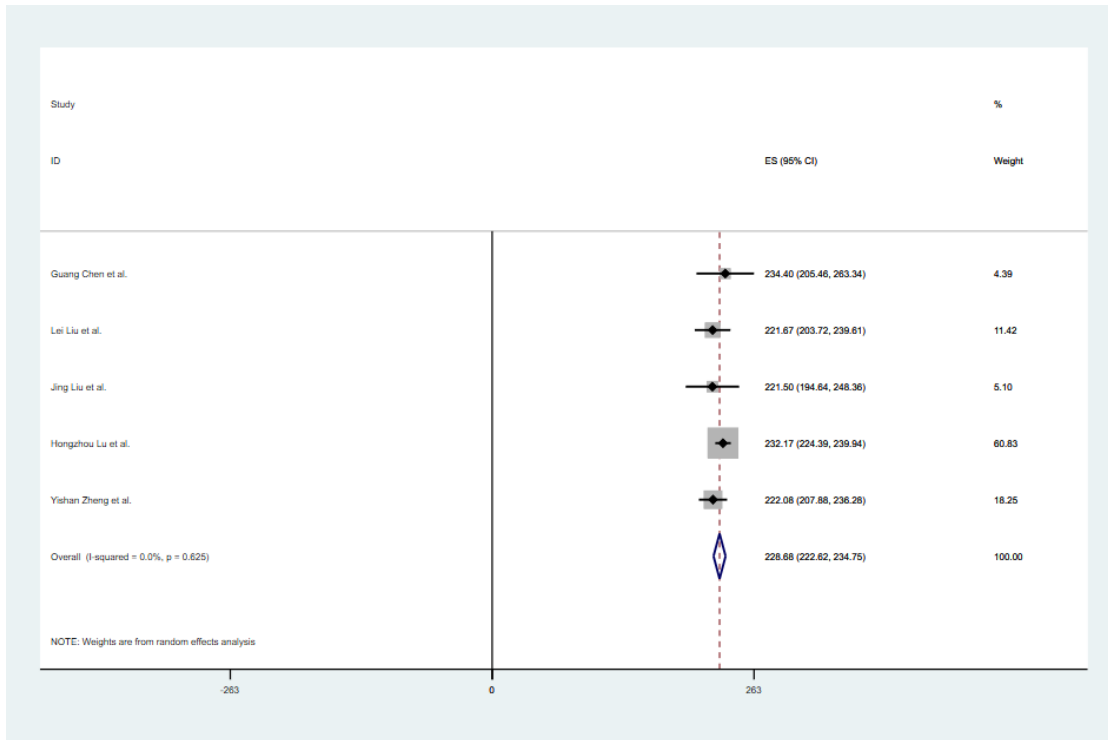

**eFigure 4. 12. Forest plot of CK, creatine kinase.**

**A. Overall**

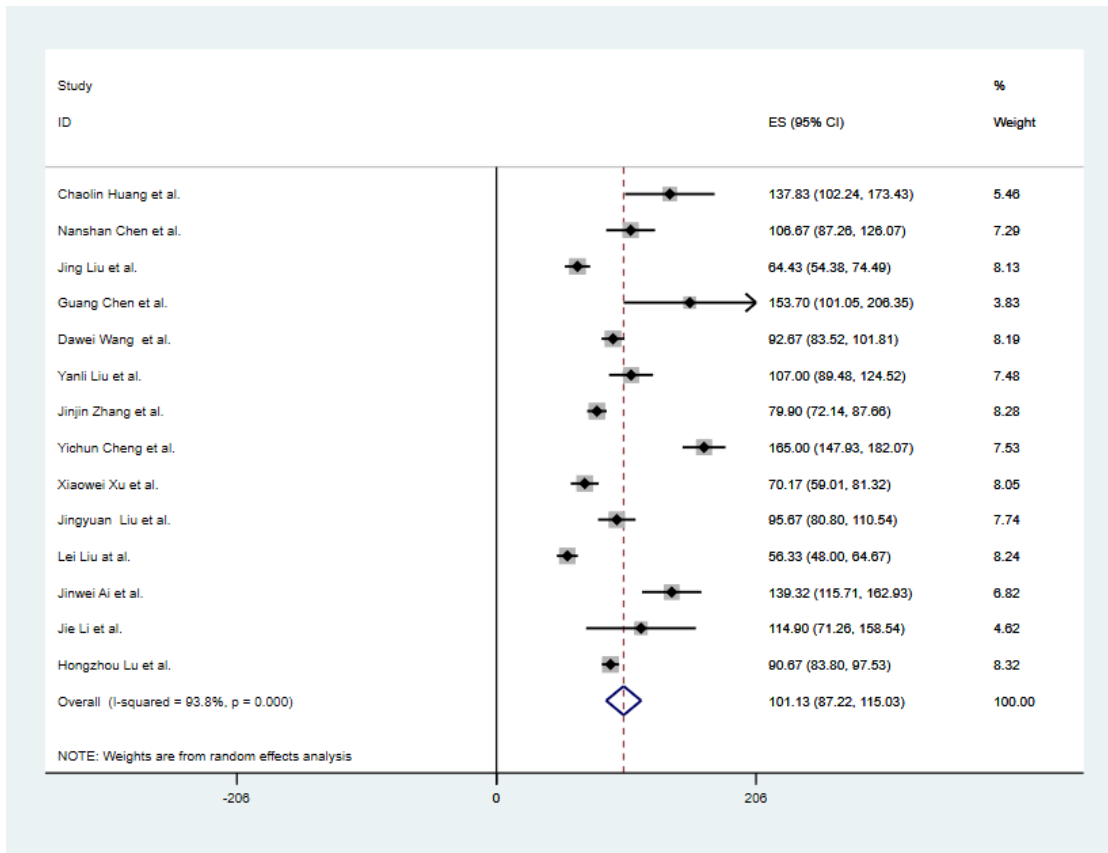

**B. Wuhan**



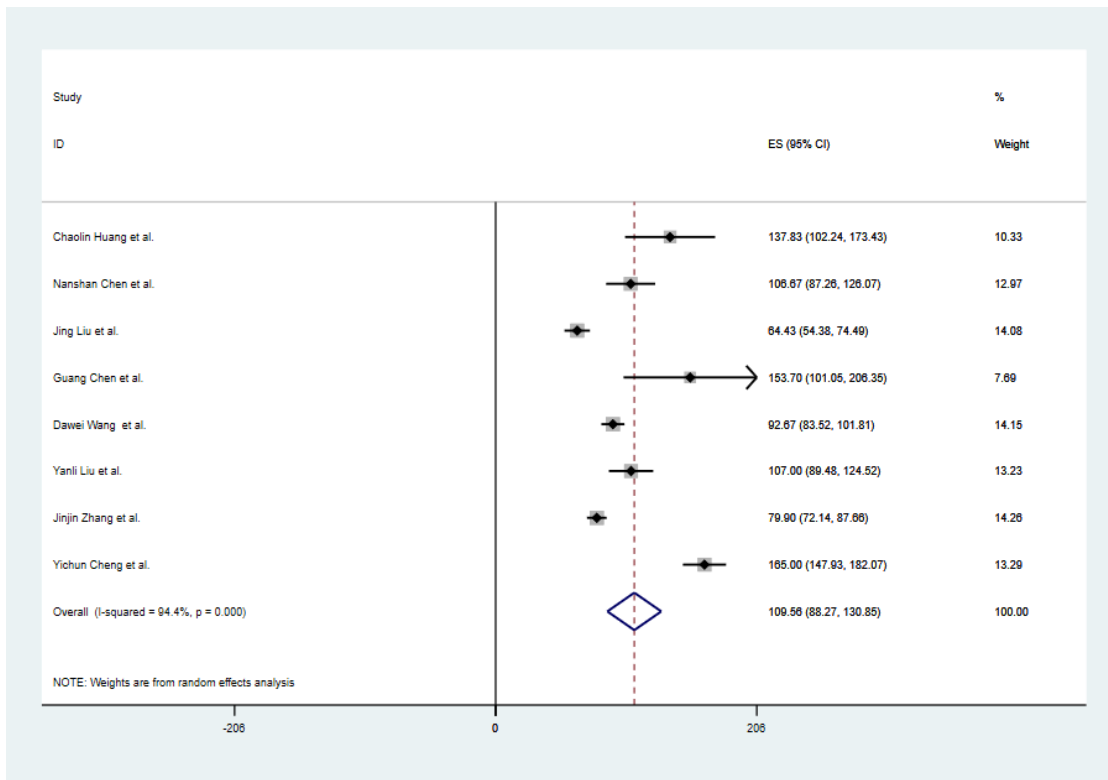

### C. Outside Wuhan

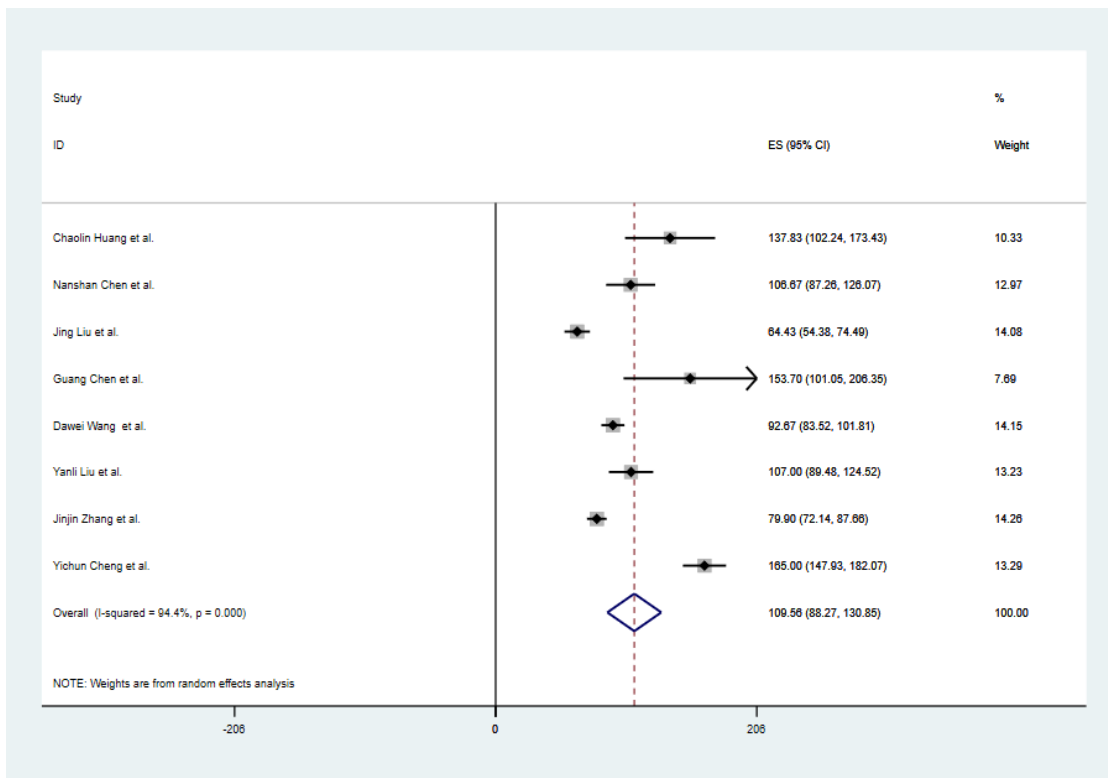

### D. Severe cases

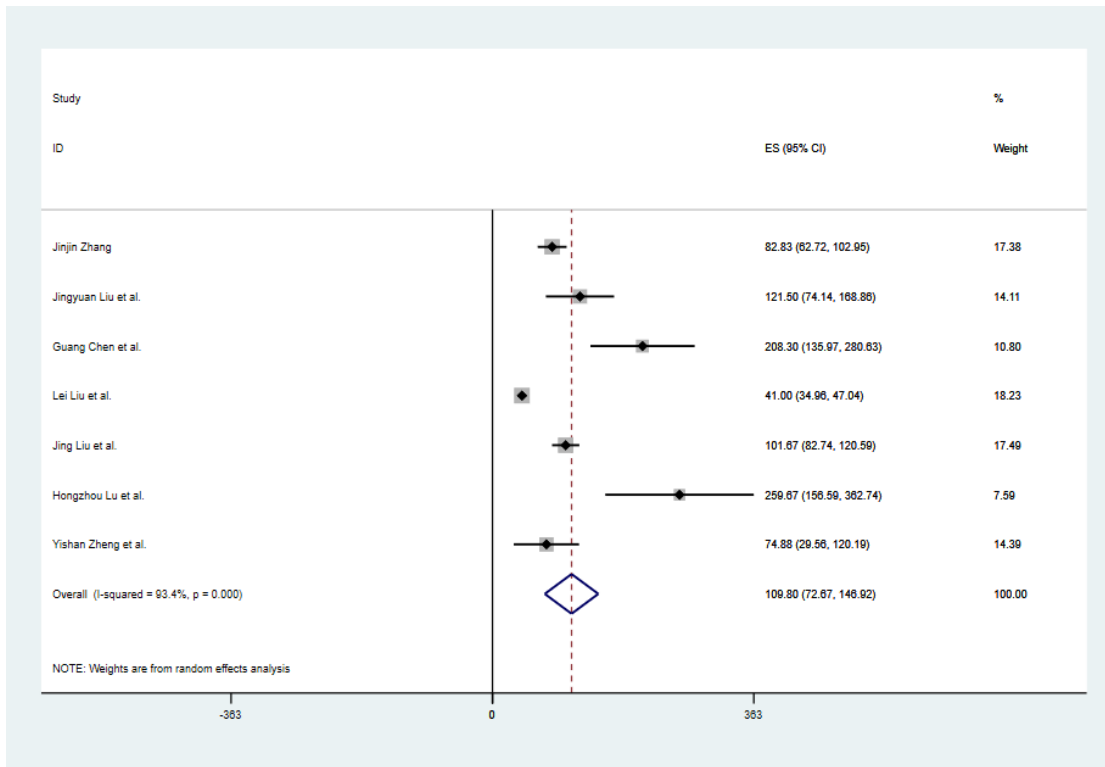

### E. Non-severe cases

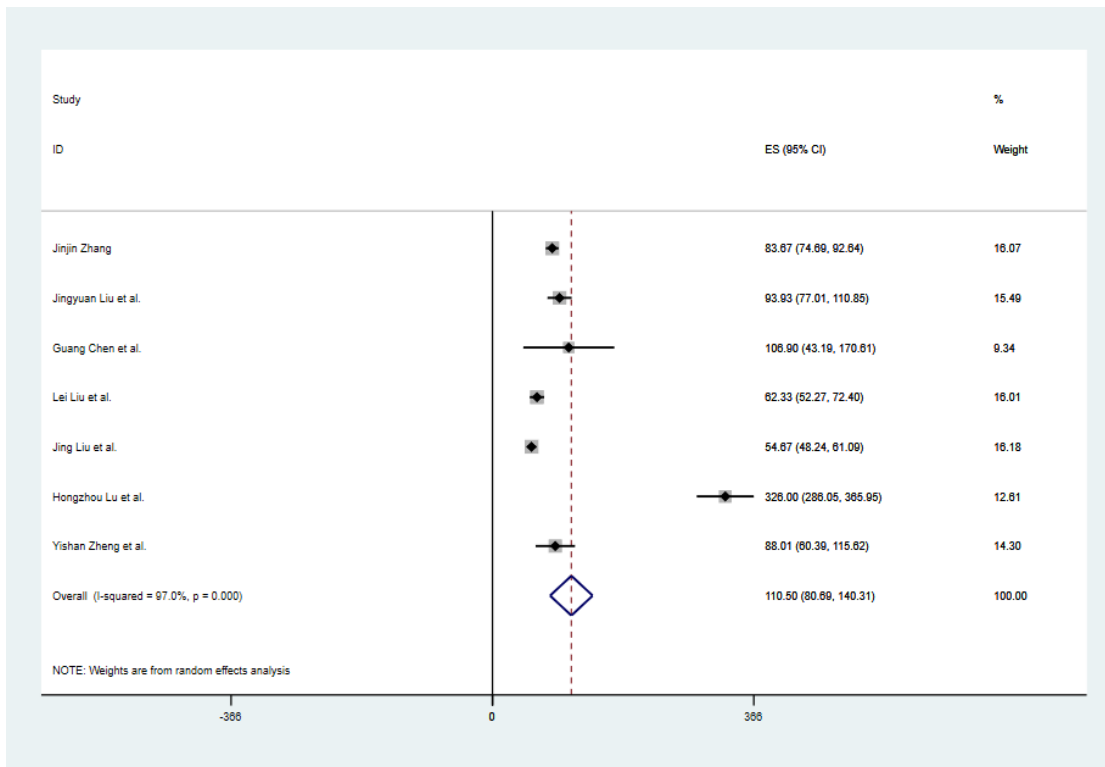

**eFigure 4. 13. Forest plot of Mb, myoglobin.**

#### A. Overall

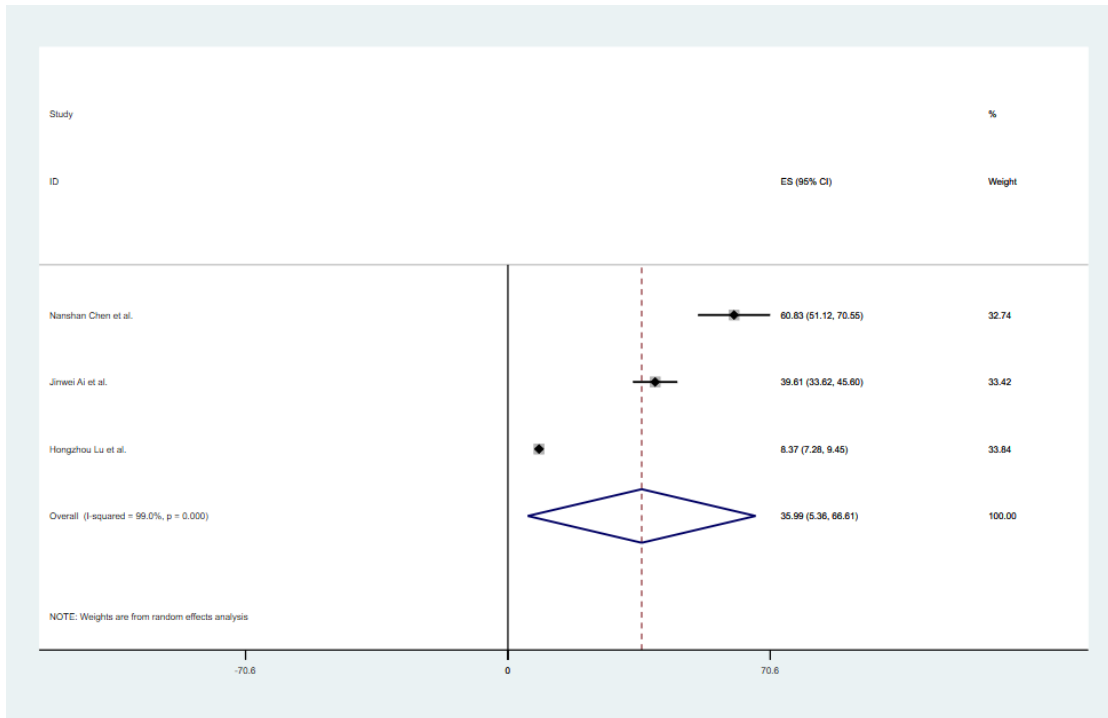

**eFigure 4. 14. Forest plot of ALT, alanine aminotransferase.**

**A. Overall**

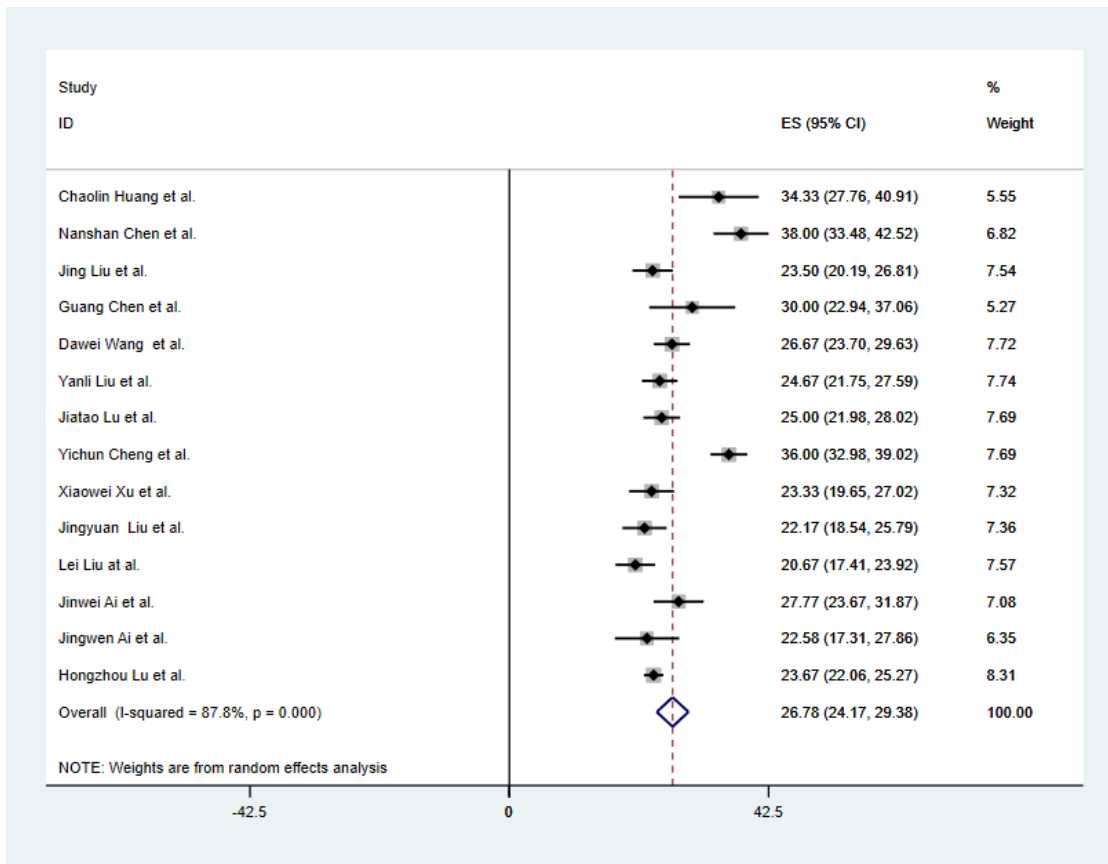

**B. Wuhan**

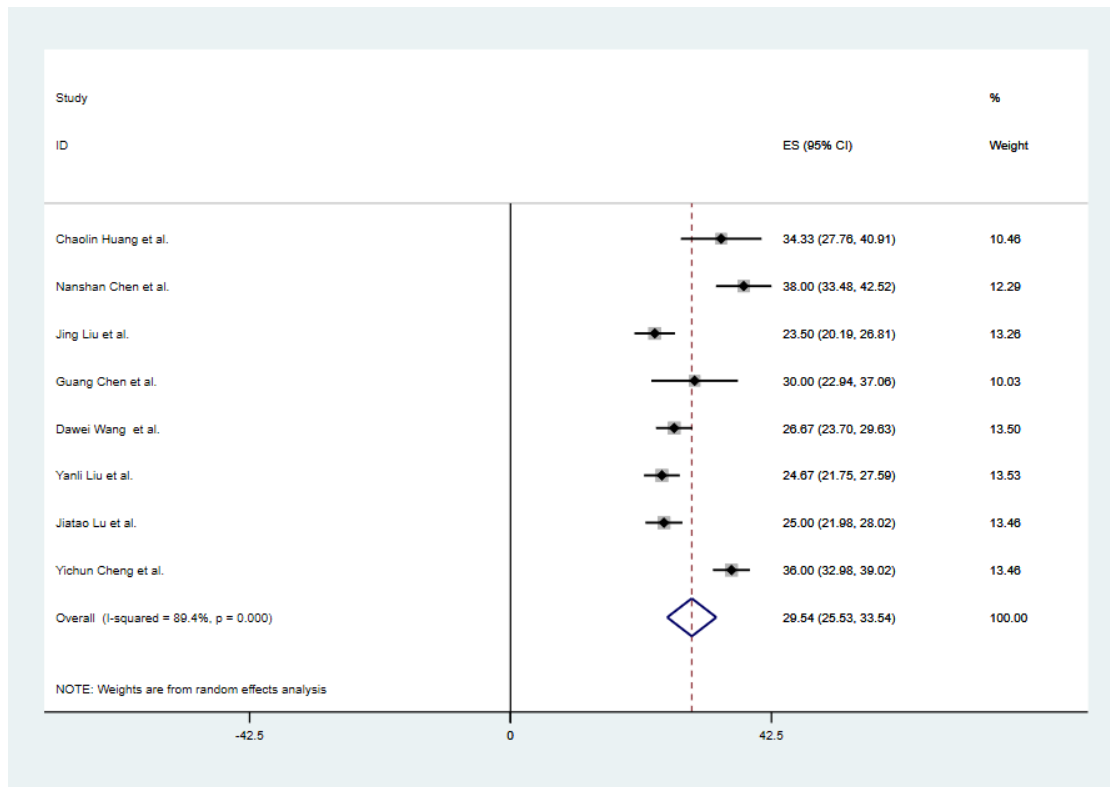

### C. Outside Wuhan

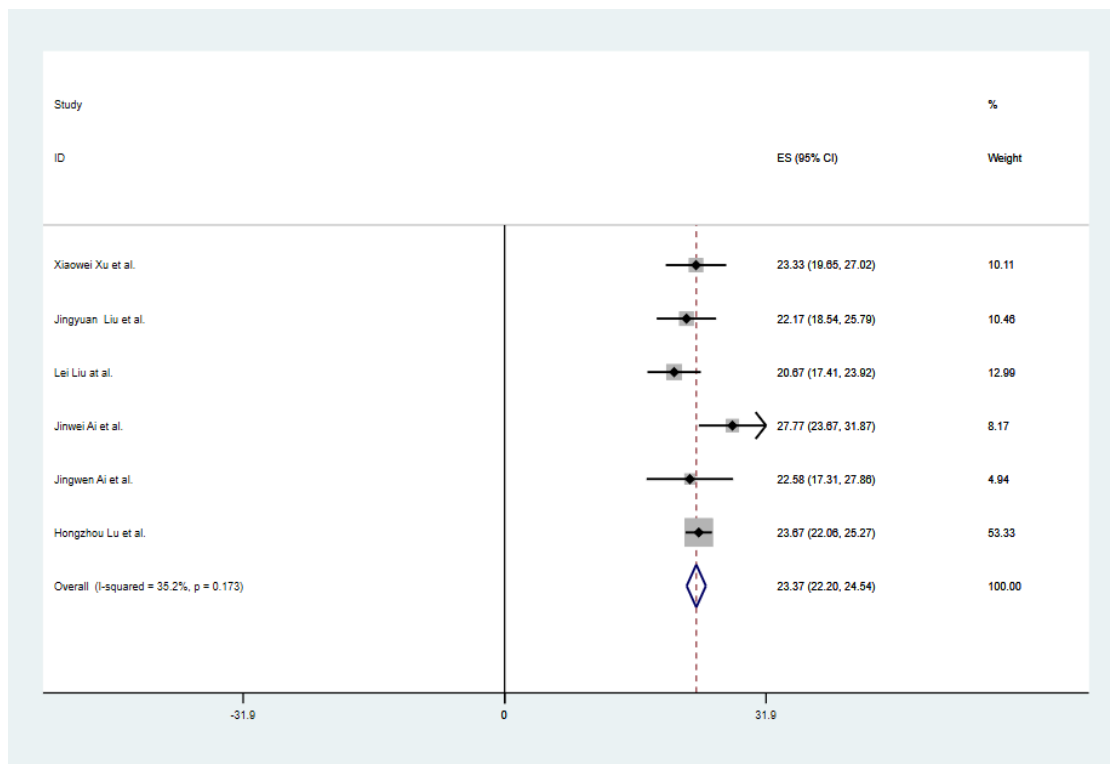

### D. Severe cases

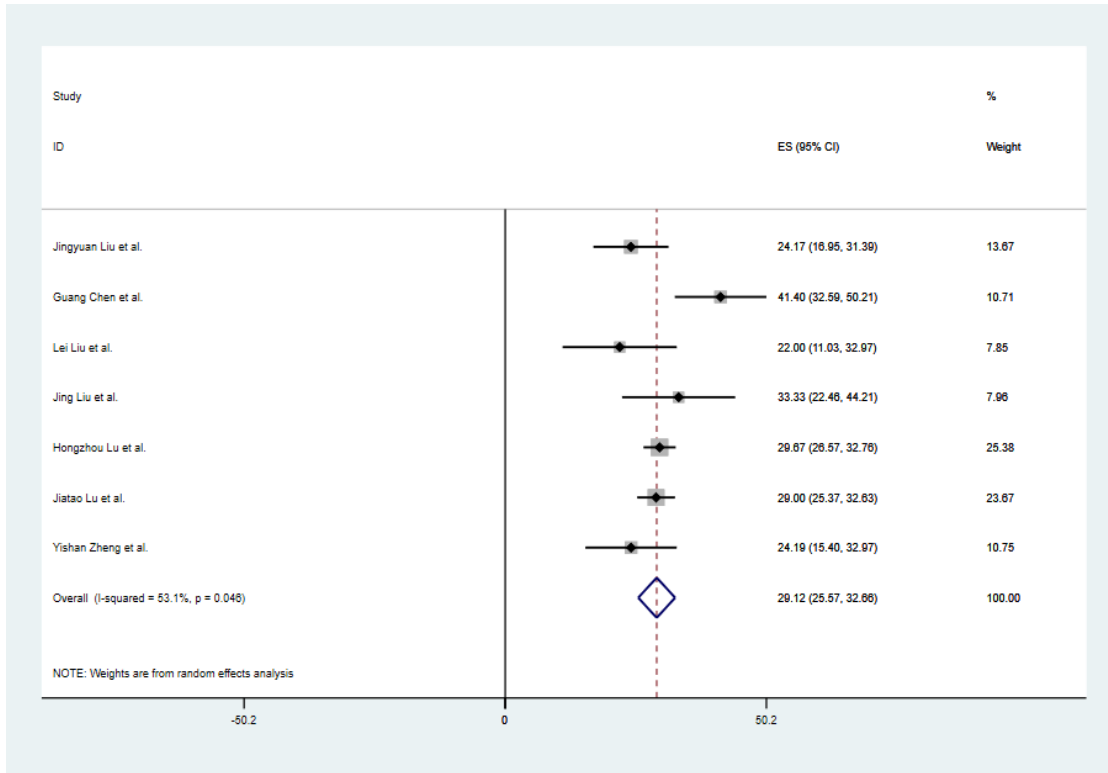

E. Non-severe cases

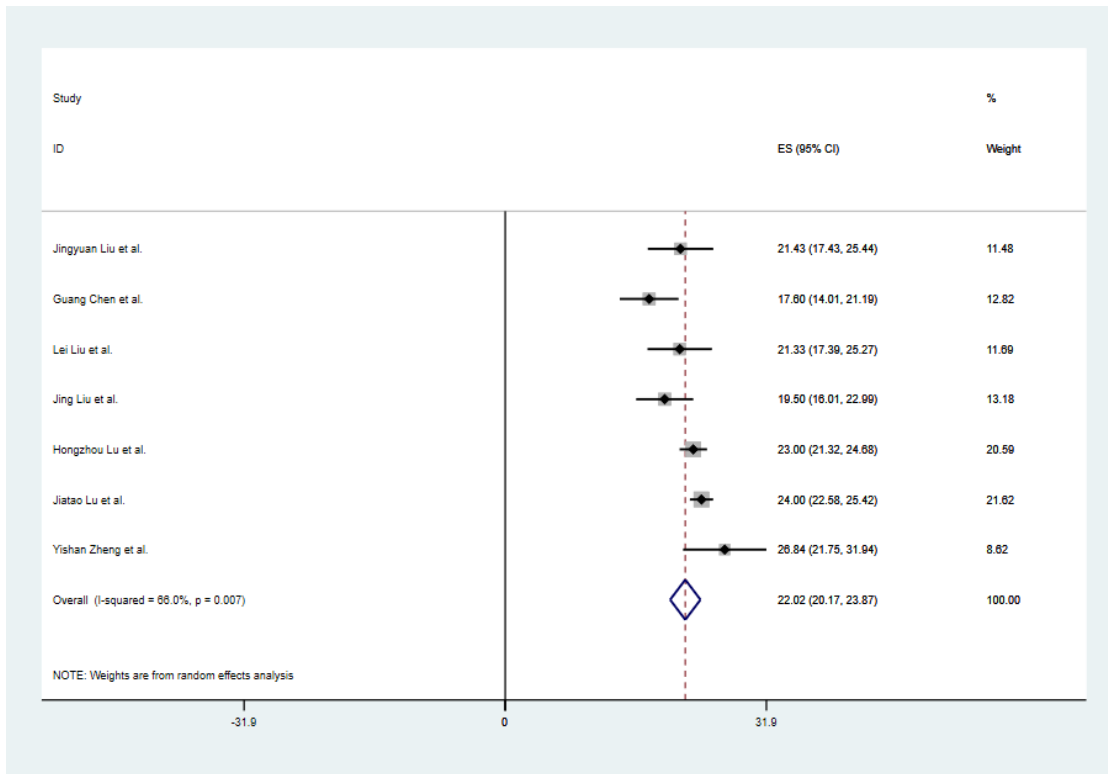

eFigure 4. 15. Forest plot of AST, aspartate aminotransferase.

A. Overall

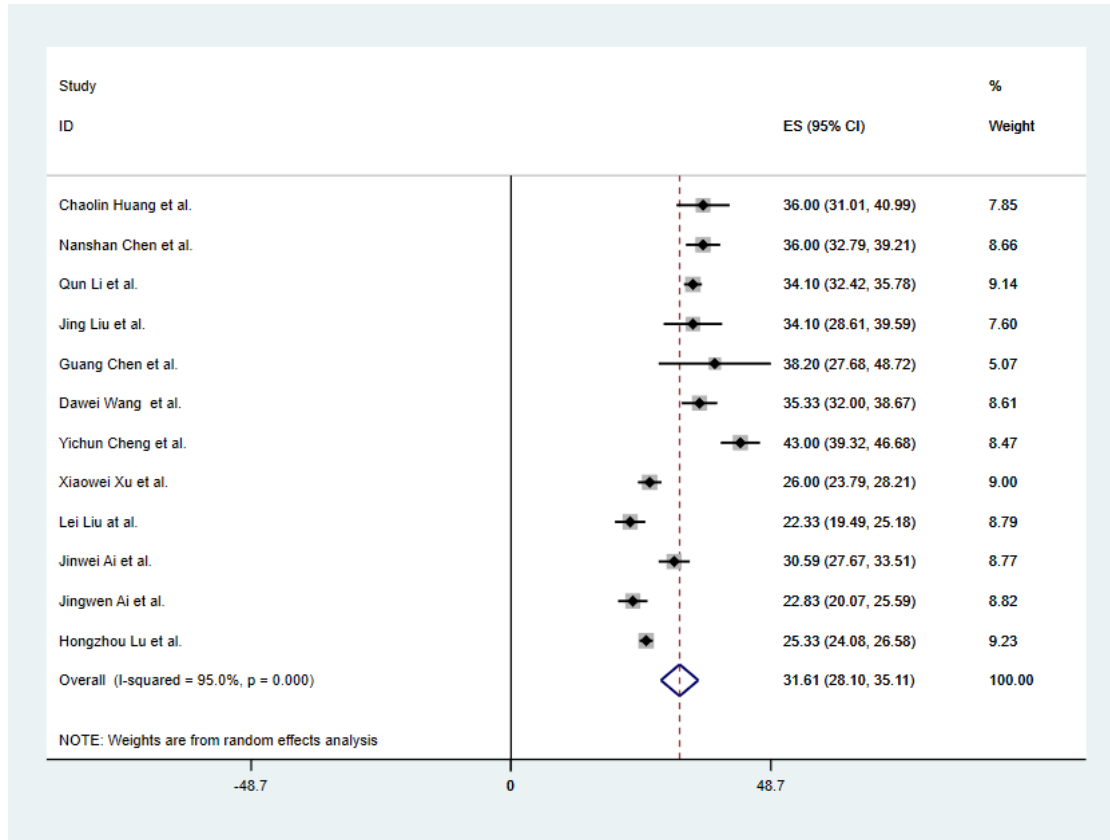

## B. Wuhan

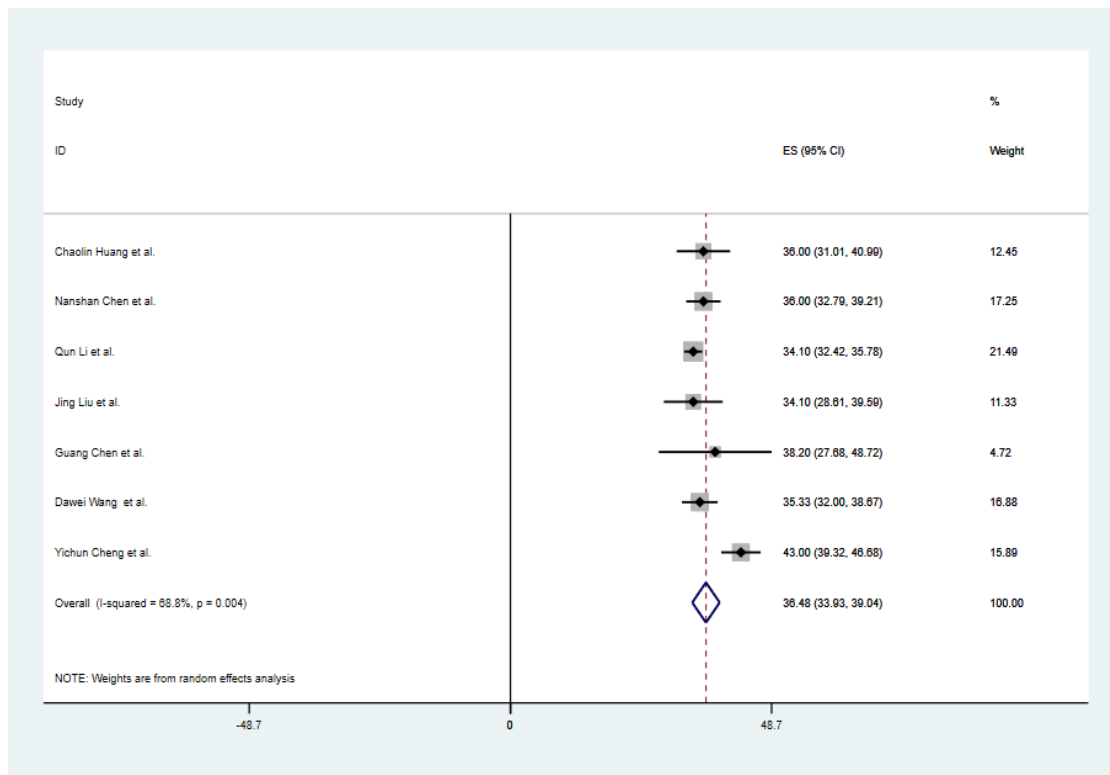

## C. Outside Wuhan

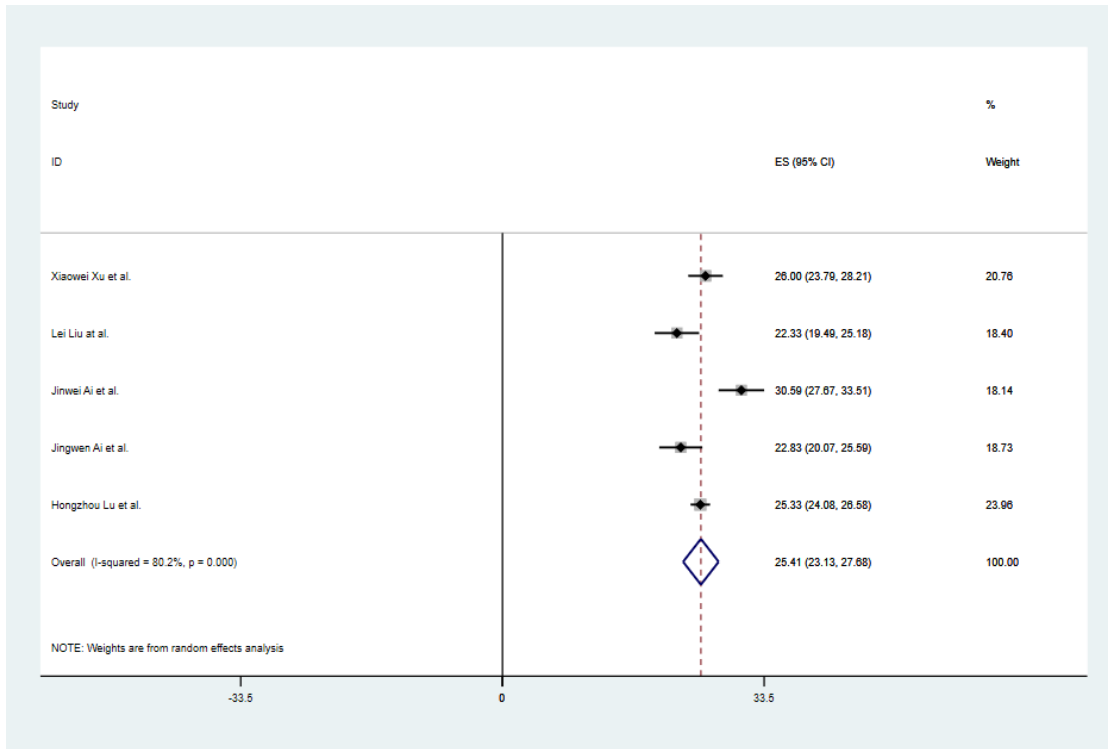

#### D. Severe cases

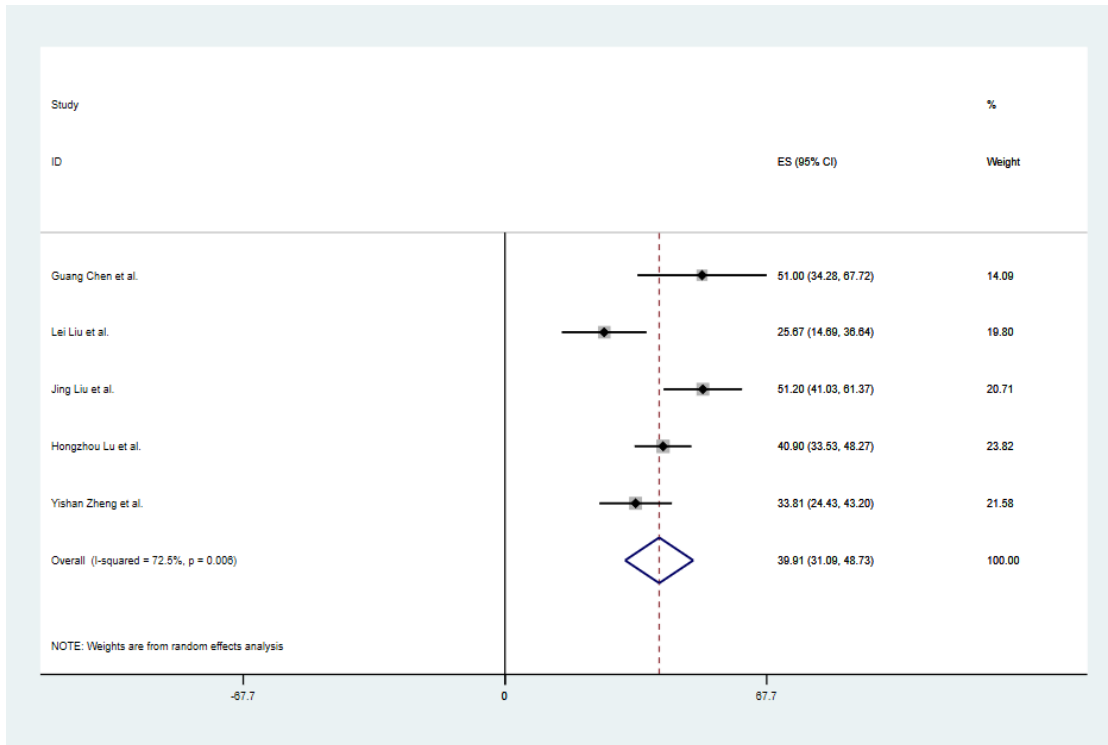

#### E. Non-severe cases

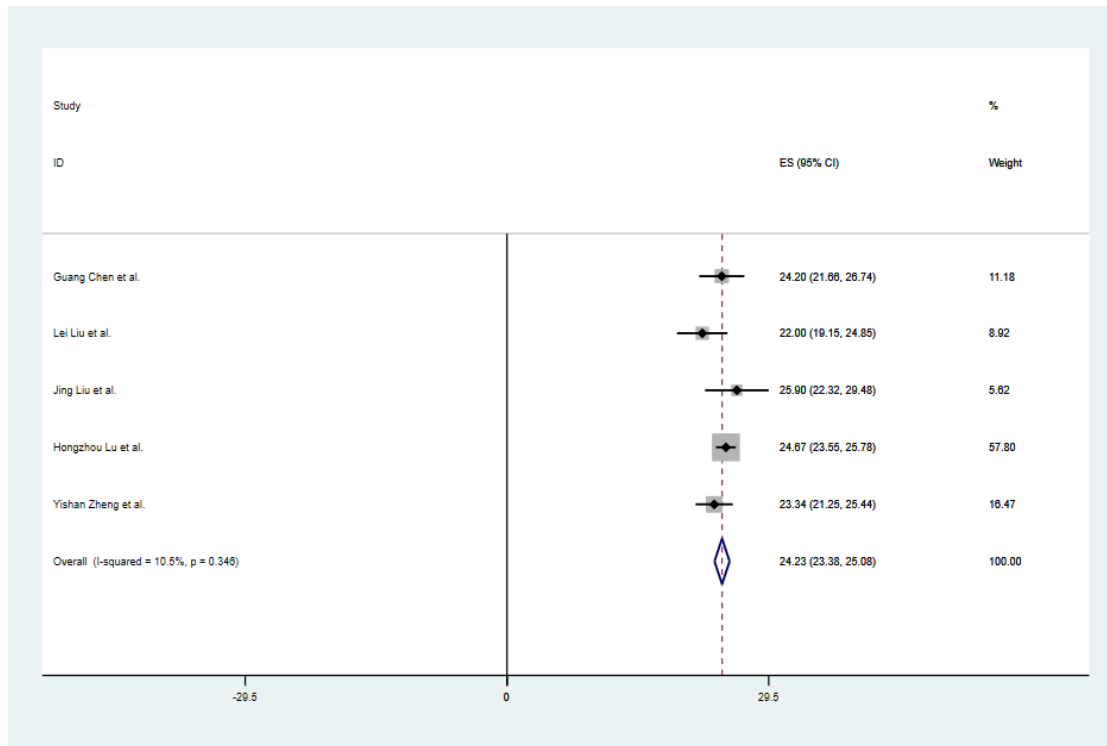

**eFigure 4. 16. Forest plot of Albumin.**

**A. Overall**

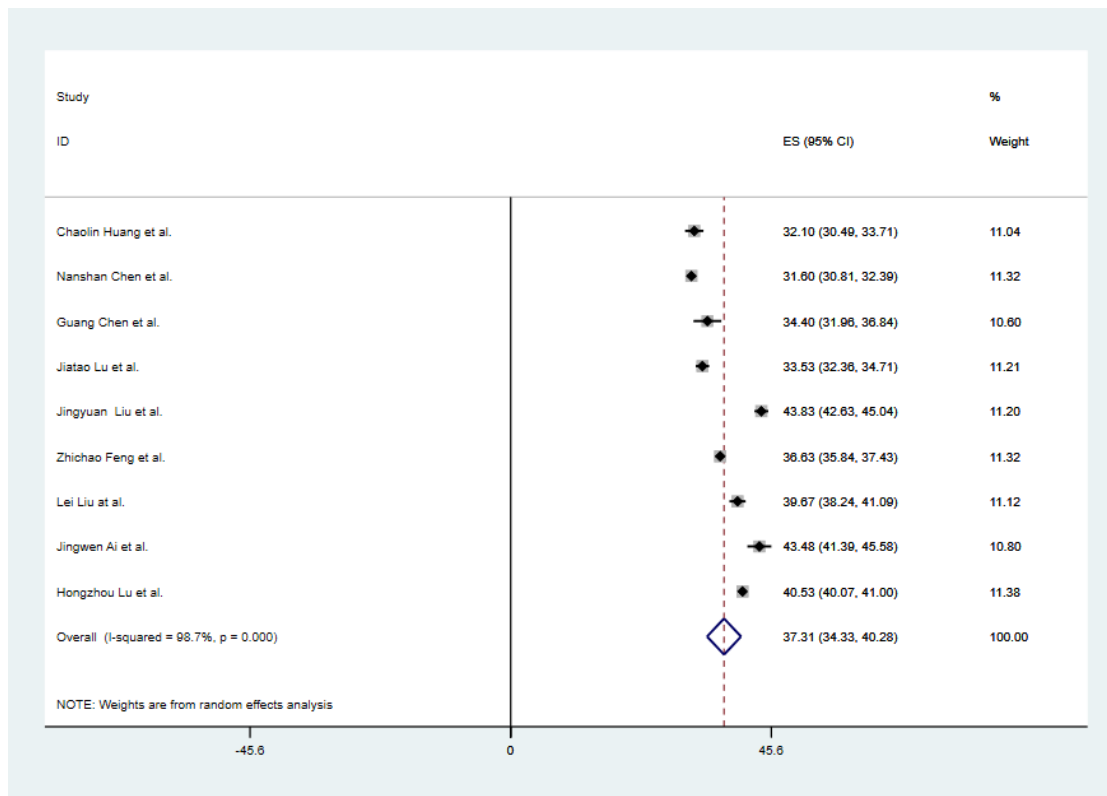

**B. Wuhan**



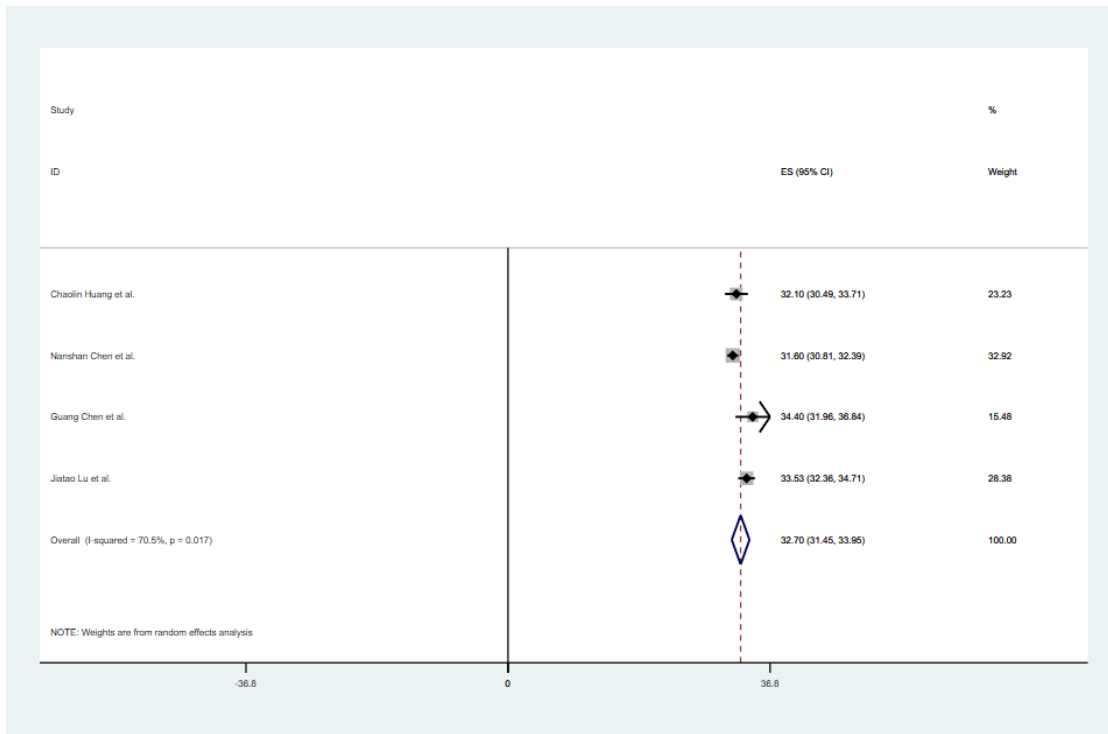

### C. Outside Wuhan

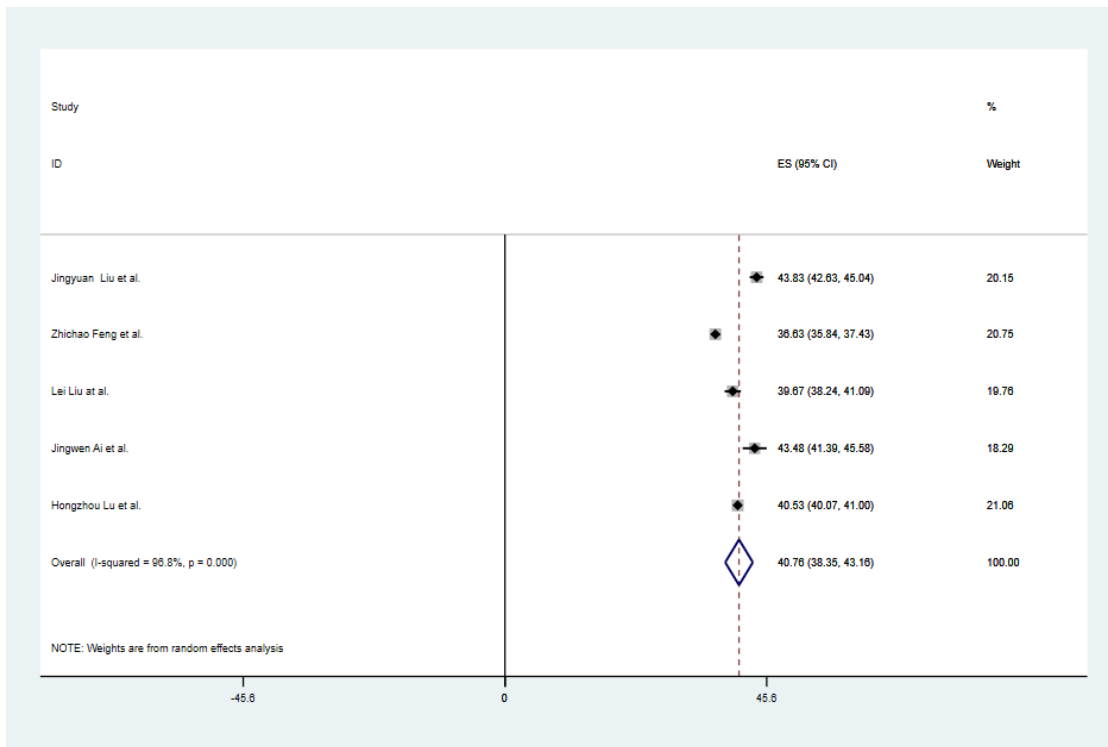

### D. Severe cases

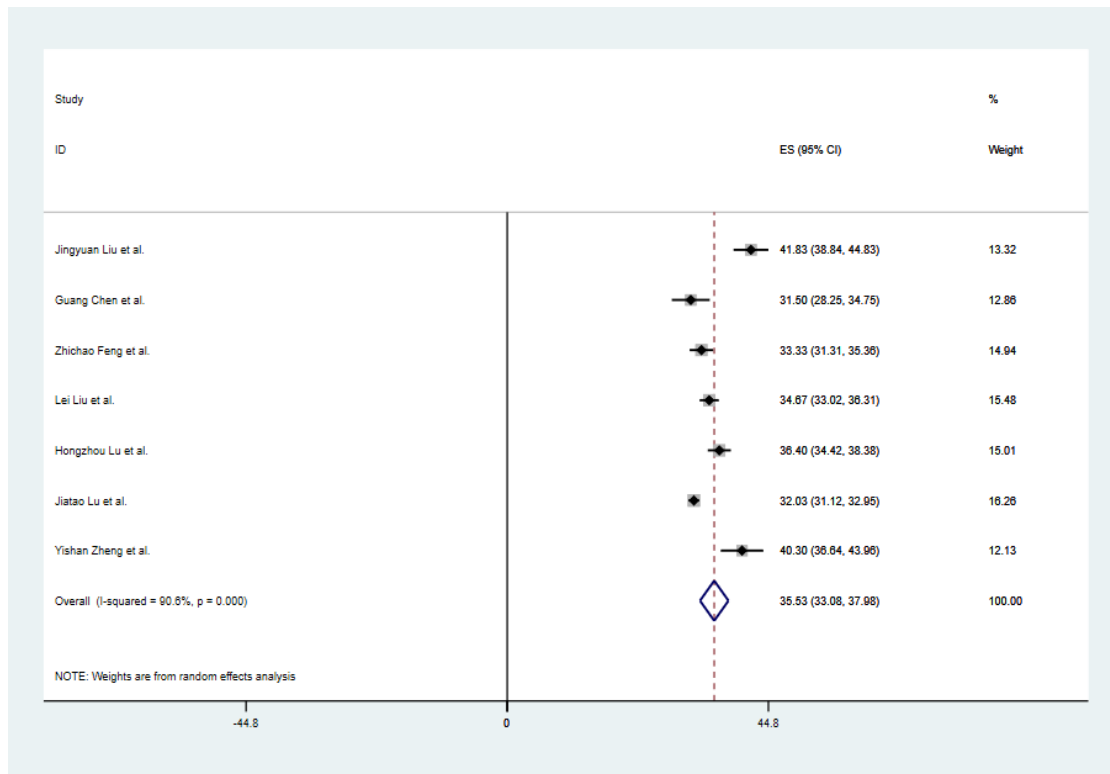

### E. Non-severe cases

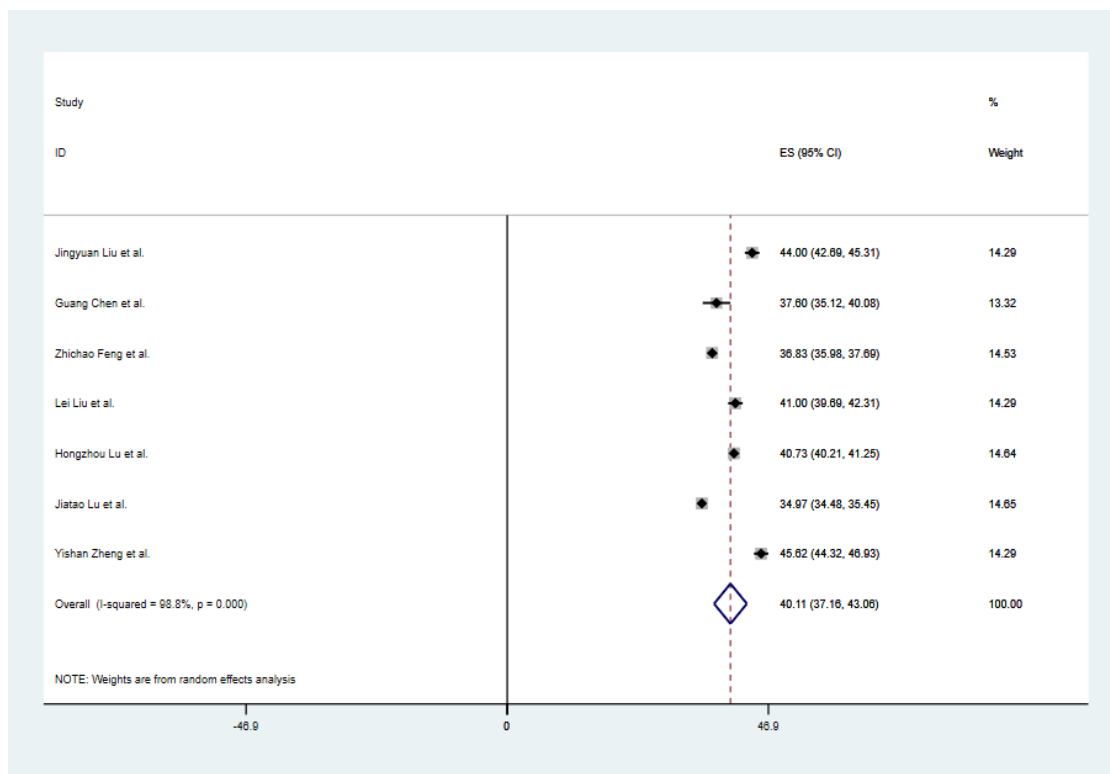

**eFigure 4. 17. Forest plot of Tbil, total bilirubin.**

#### A. Overall

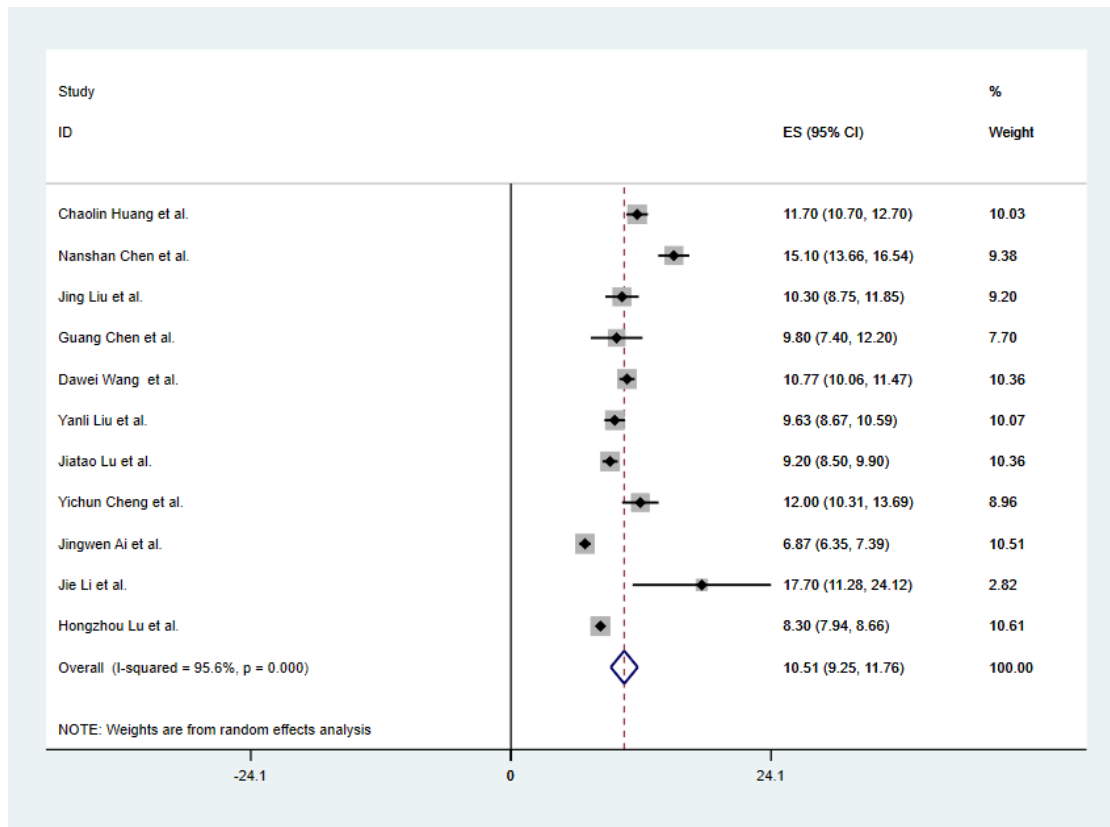

## B. Wuhan

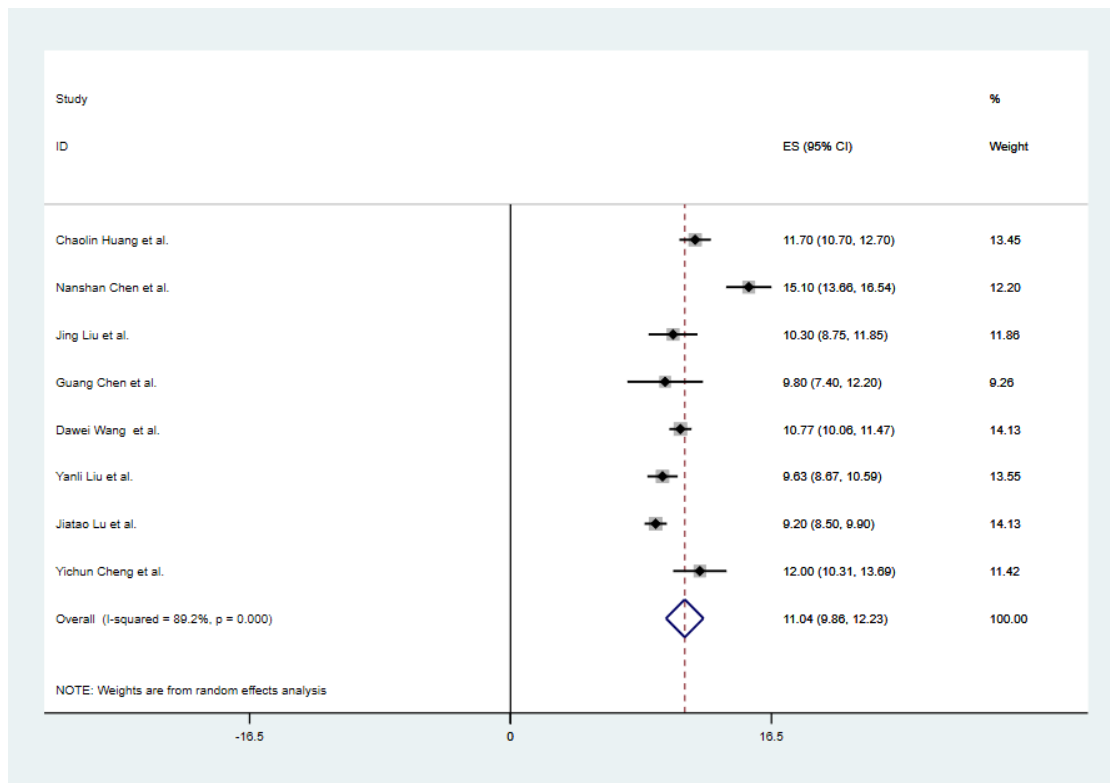

## C. Outside Wuhan

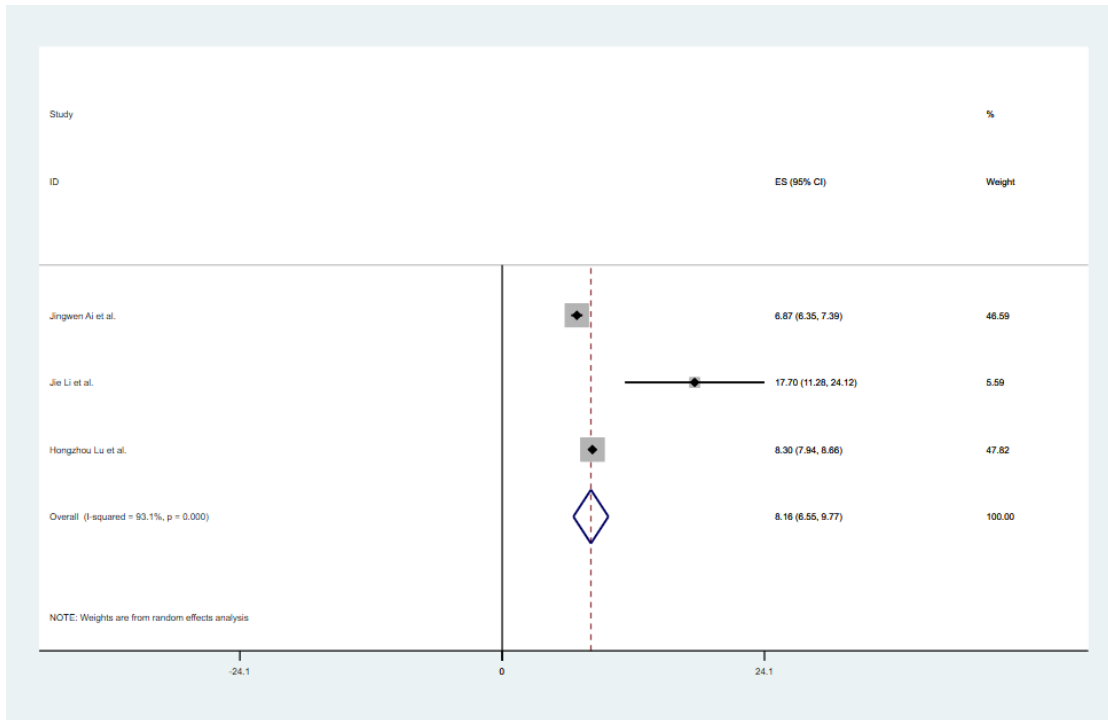

#### D. Severe cases

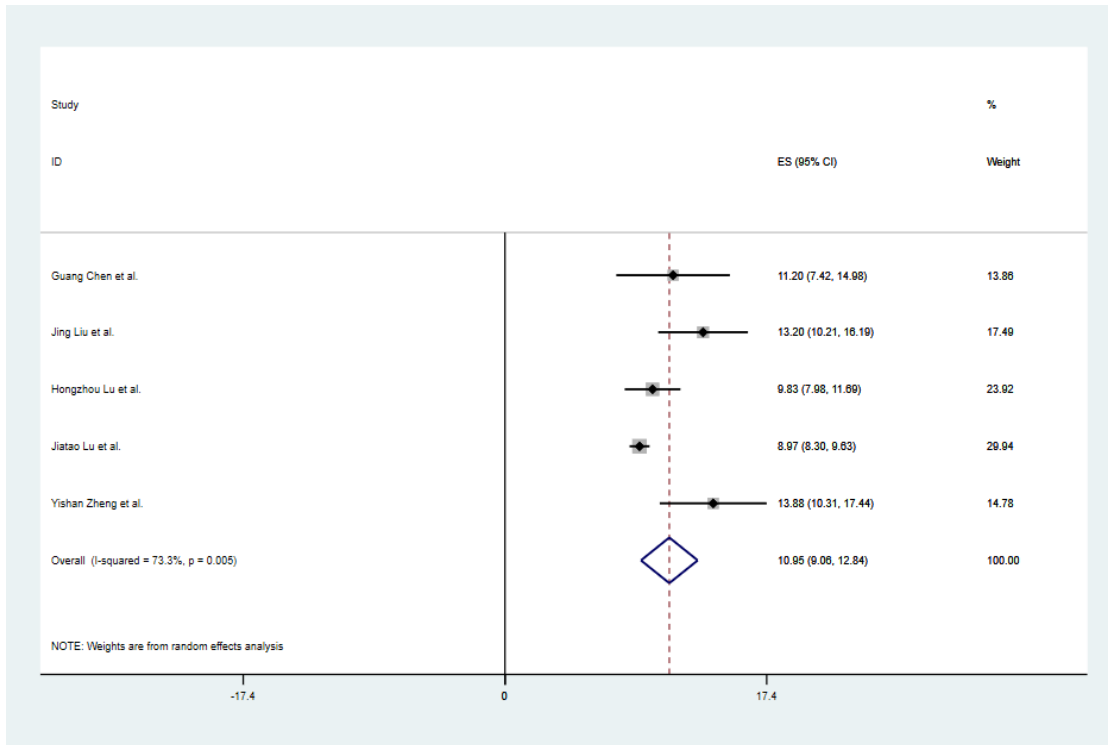

#### E. Non-severe cases

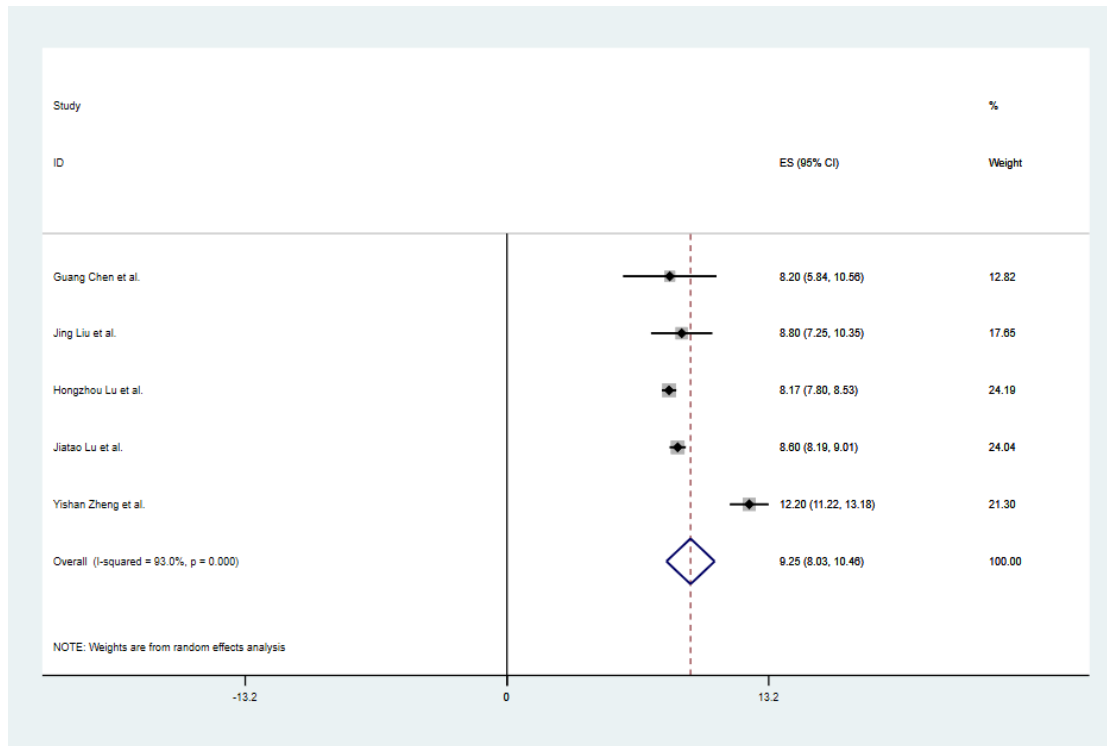

**Figure 4. 18. Forest plot of Scr, serum creatinine.**

**A. Overall**

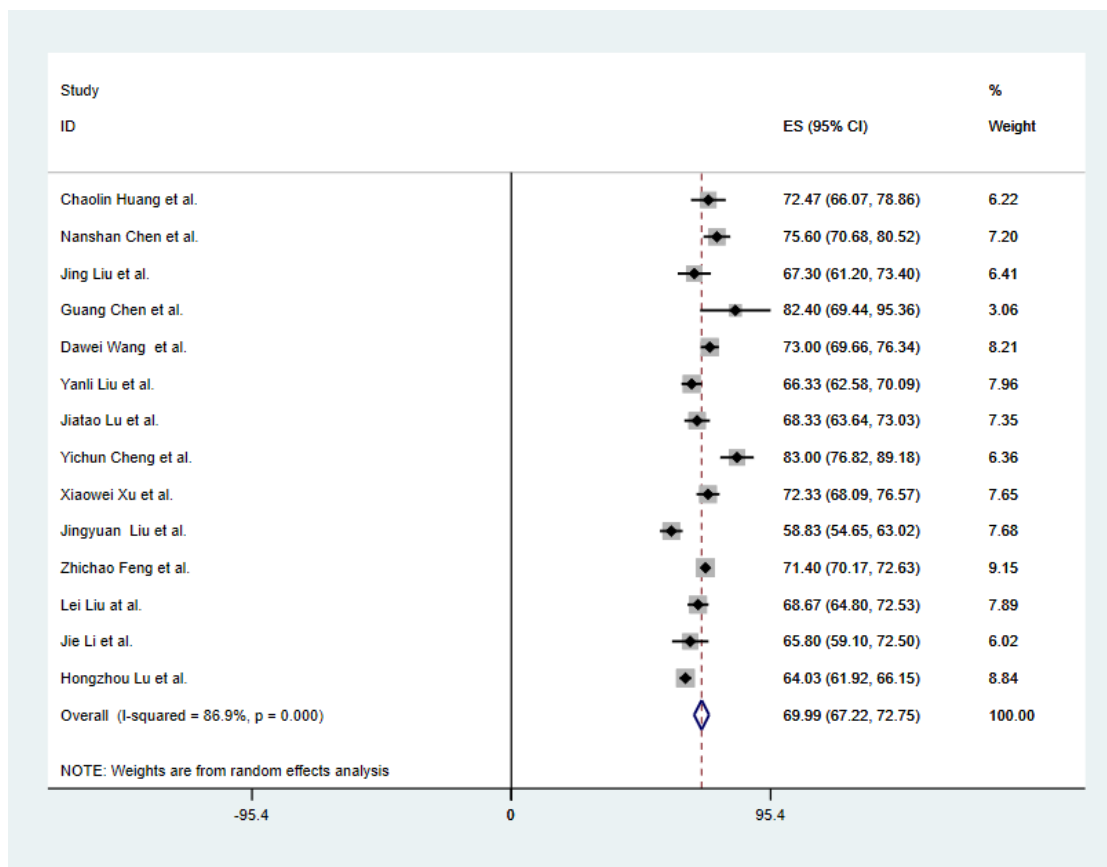

**B. Wuhan**

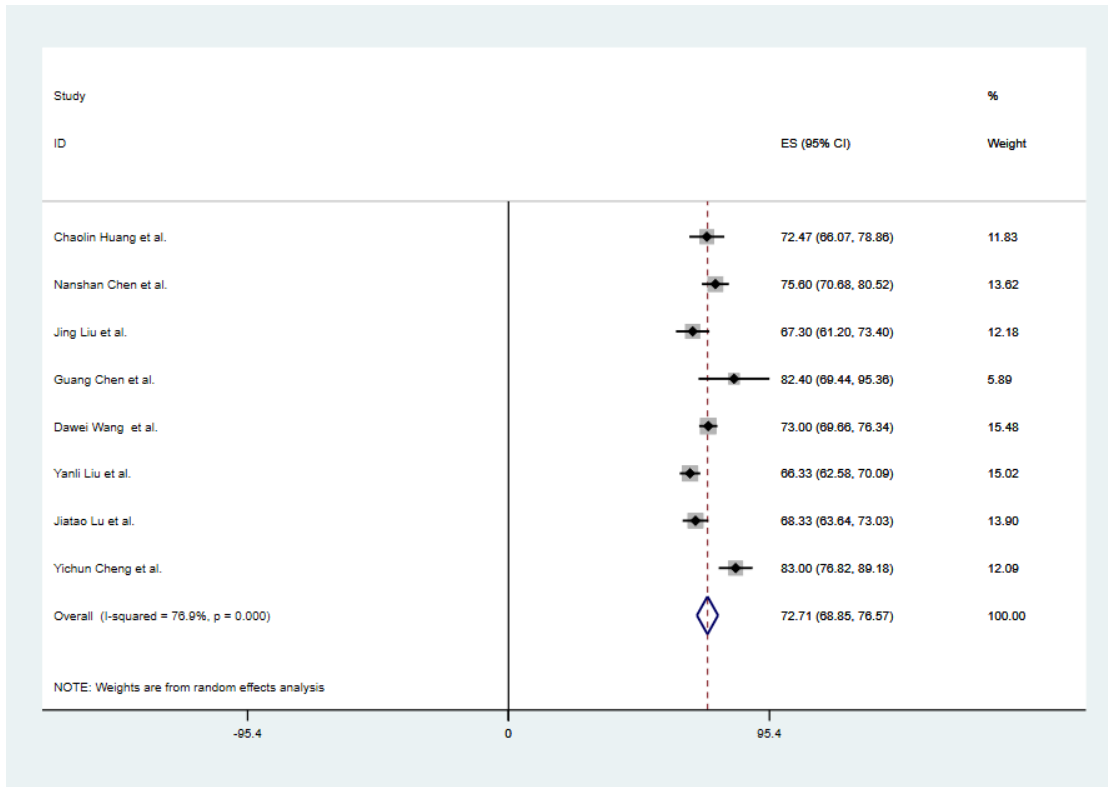

### C. Outside Wuhan

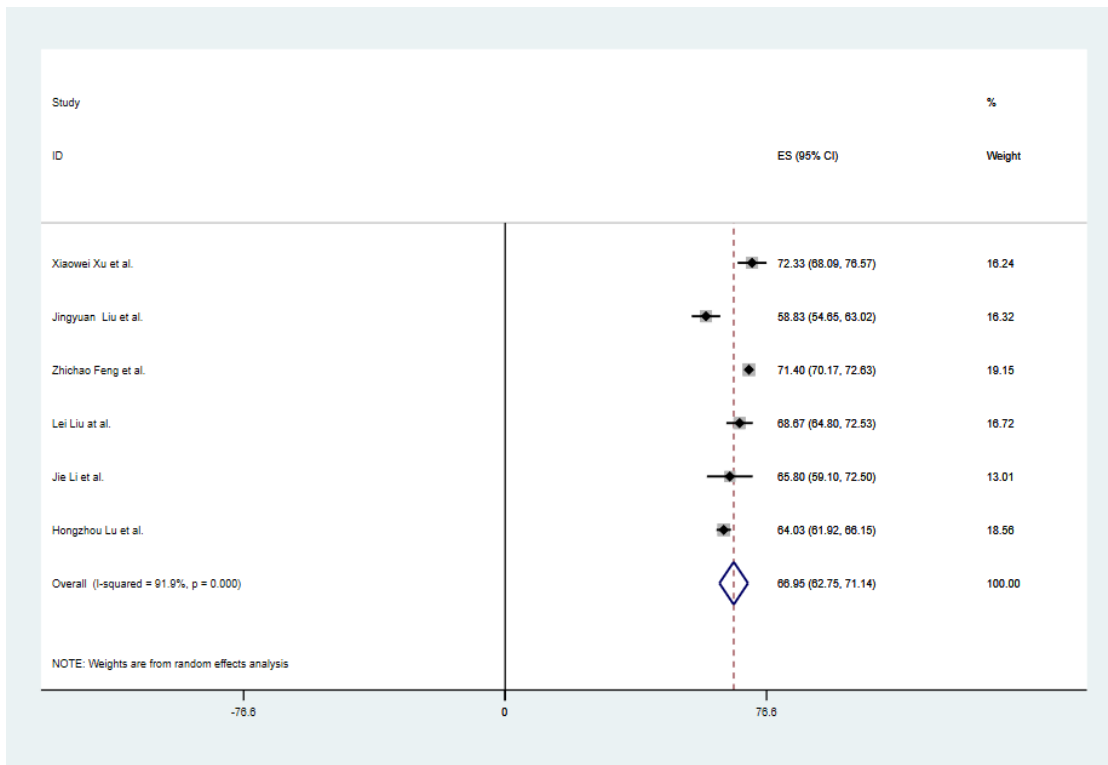

### D. Severe cases

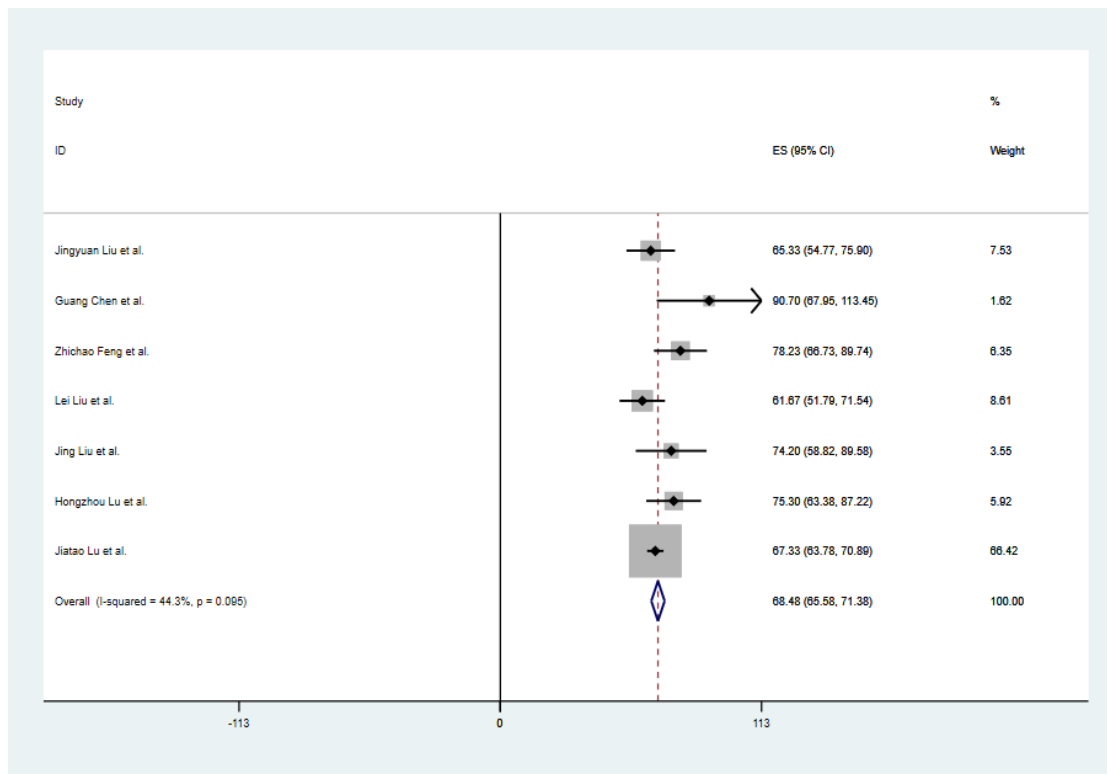

### E. Non-severe cases

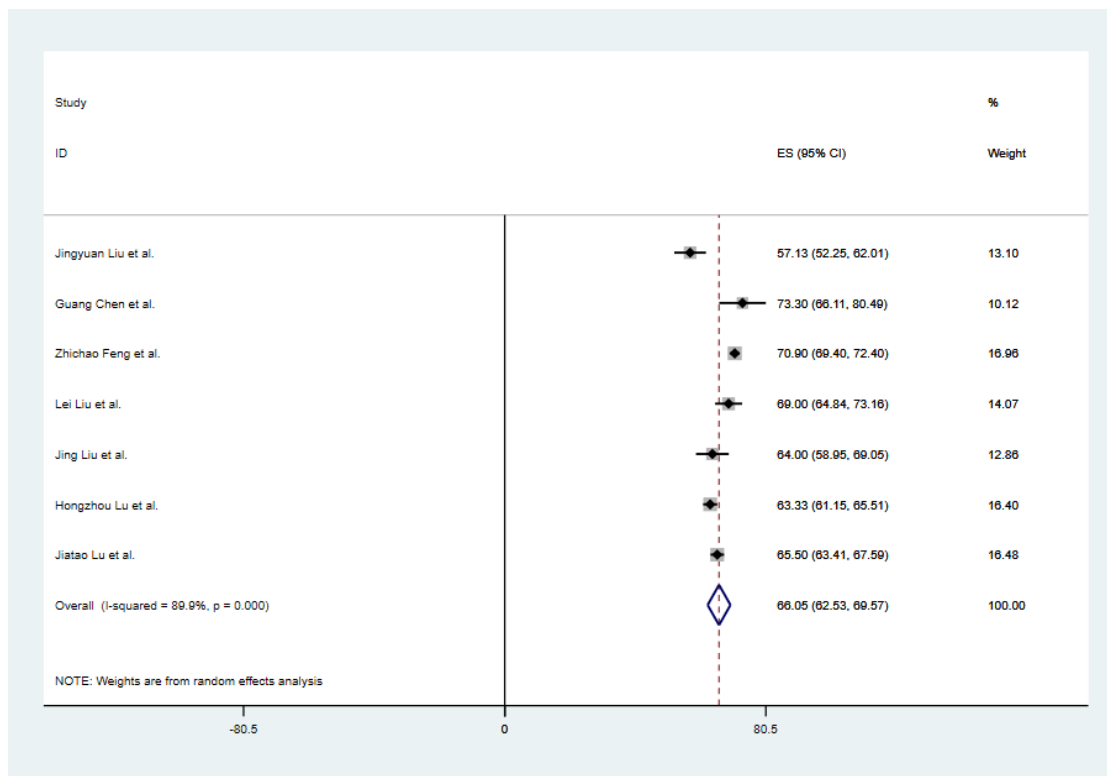

**Figure 4. 19. Forest plot of BUN, blood urea nitrogen.**

#### A. Overall

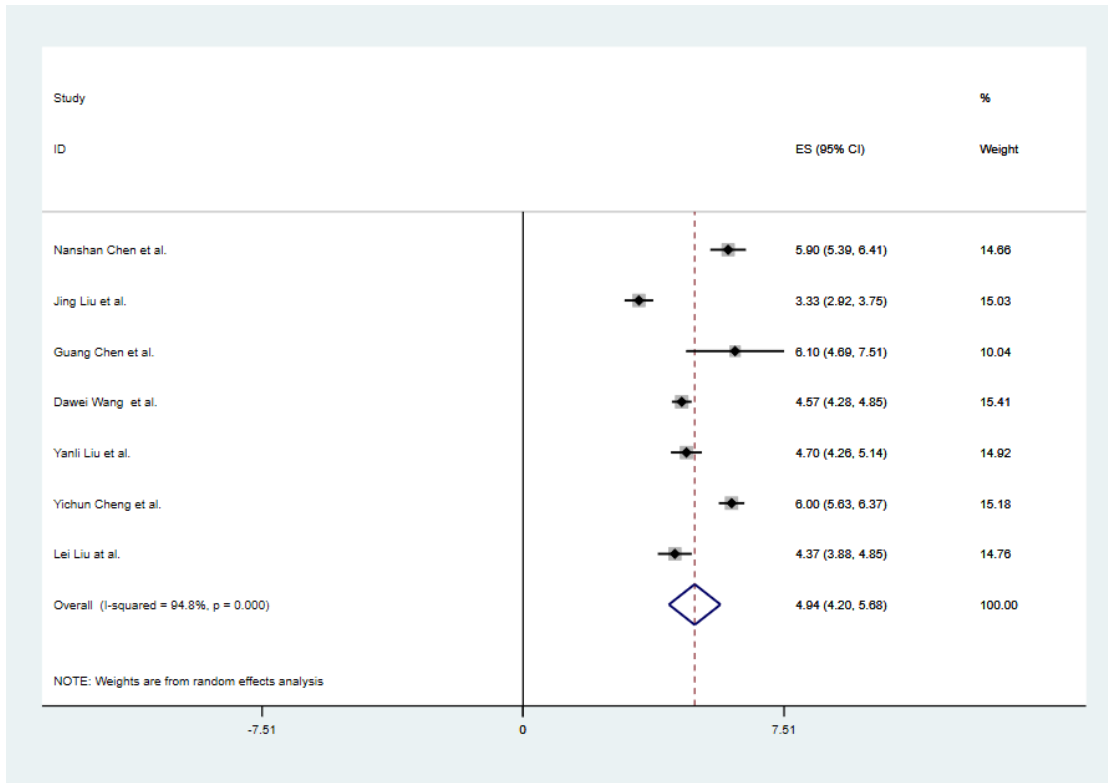

## B. Wuhan

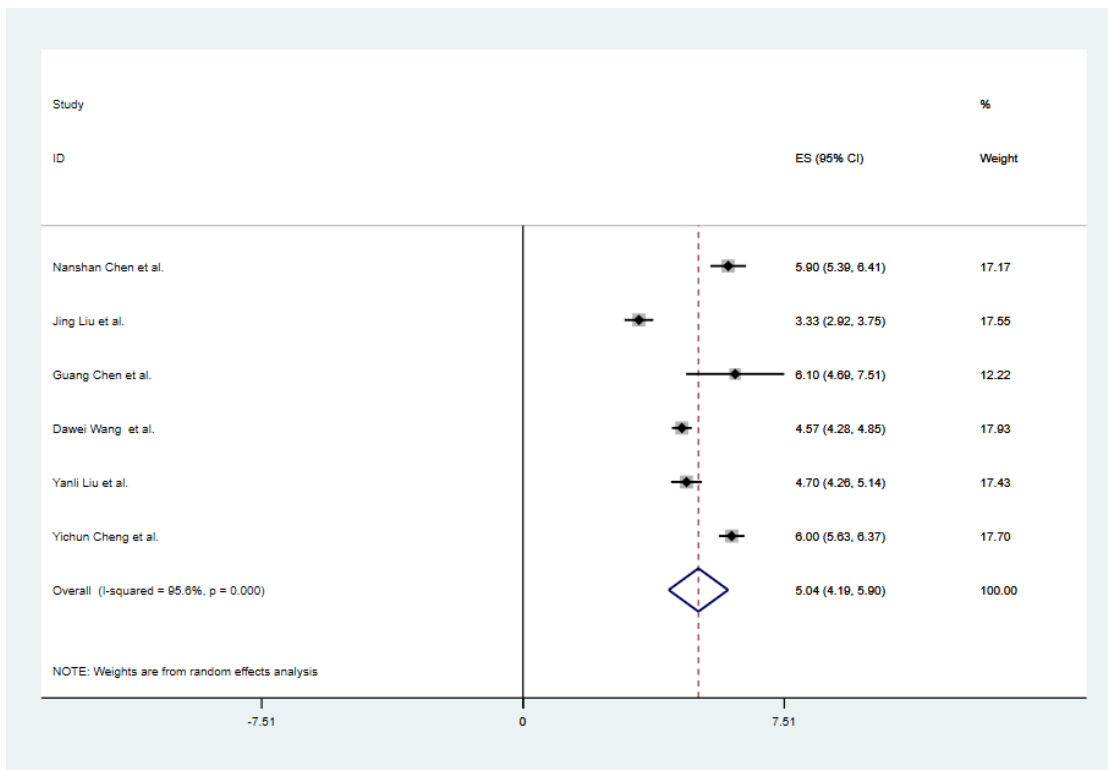

## C. Severe cases



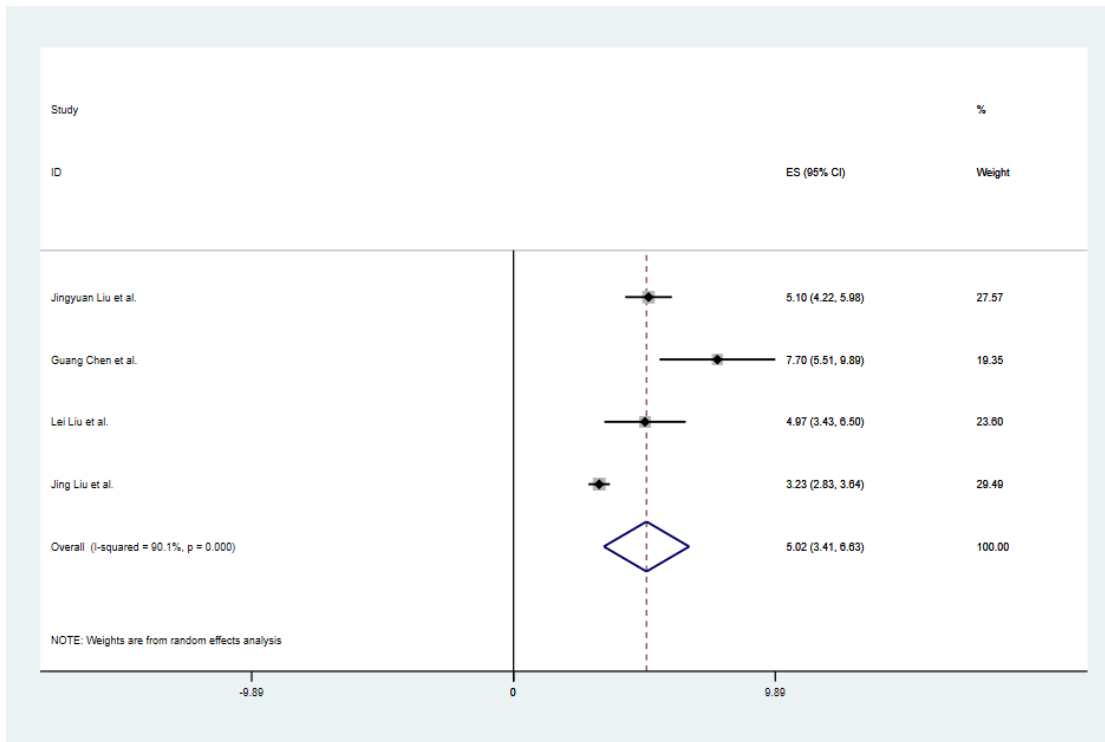

D. Non-severe cases

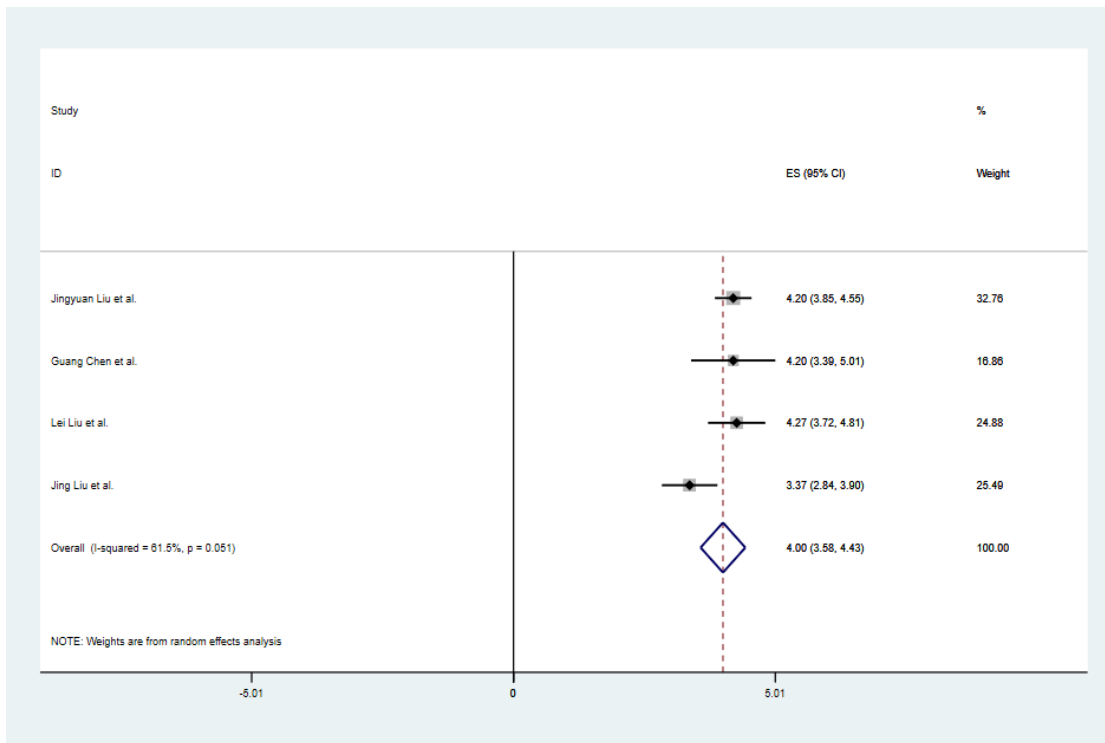

**eFigure 4. 20. Forest plot of eGFR.**

A. Overall

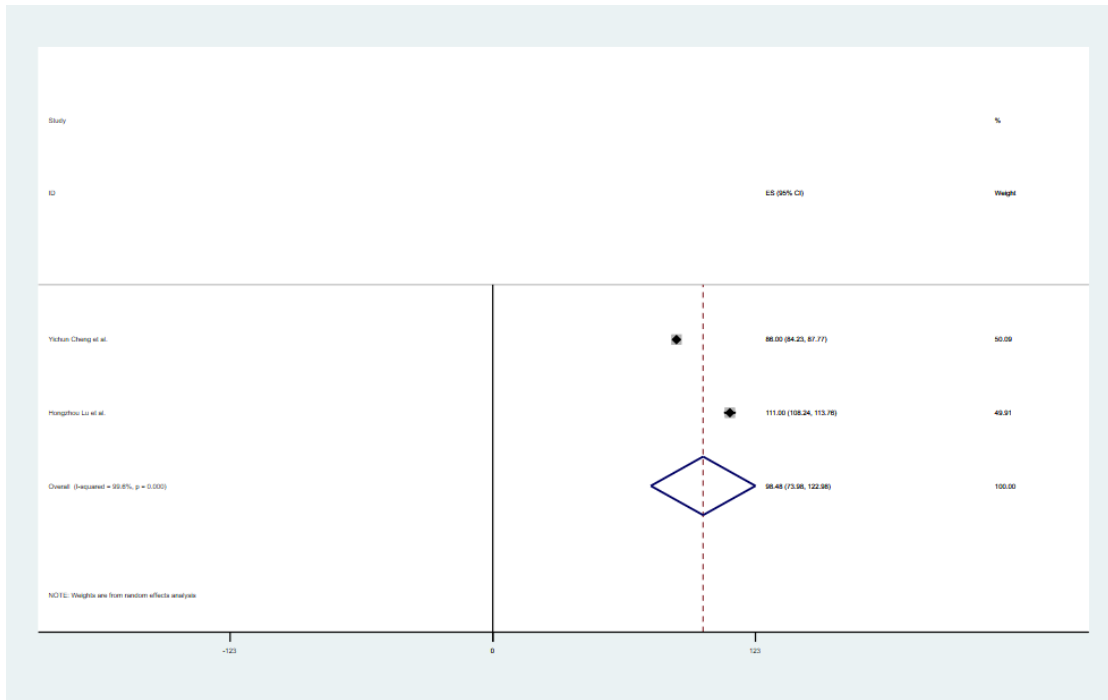

## B. Severe cases

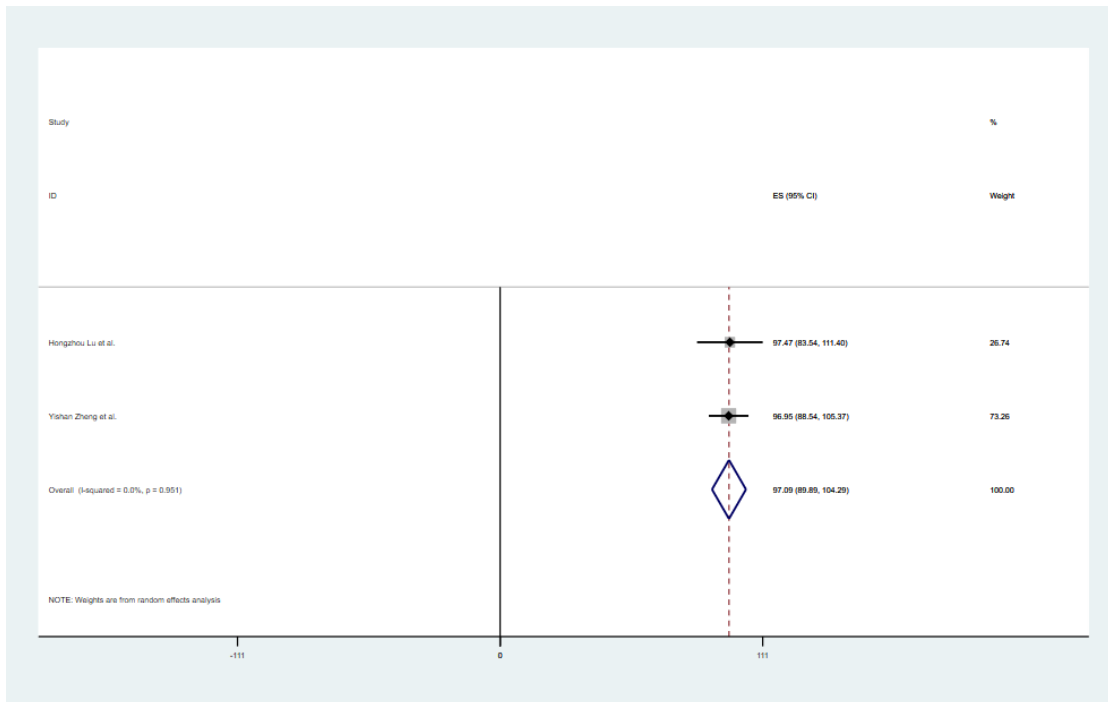

## C. Non-severe cases

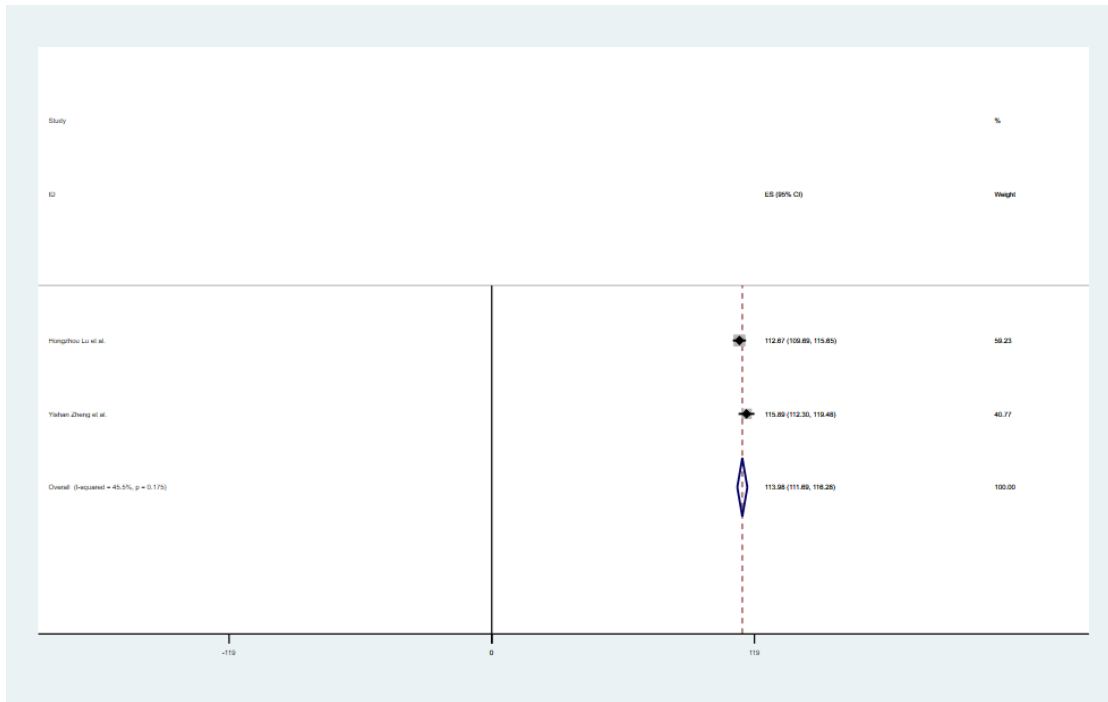

**eFigure 4. 21. Forest plot of Potassium.**

**A. Overall**

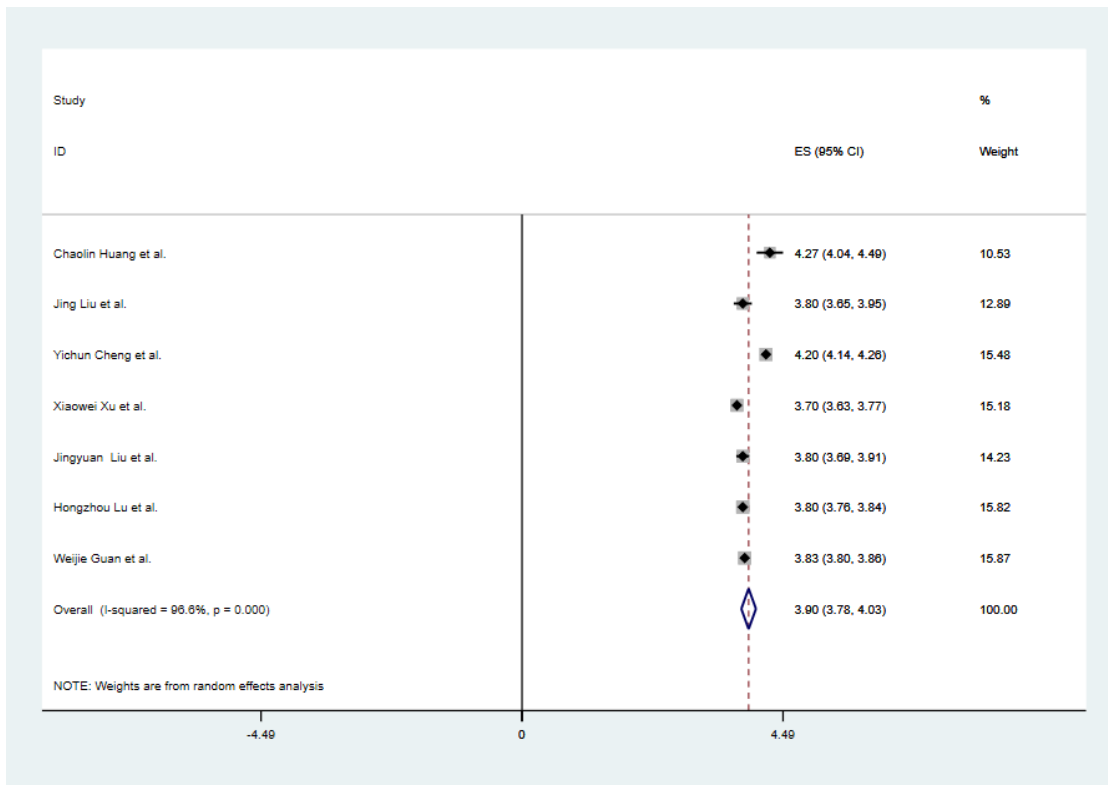

**B. Wuhan**

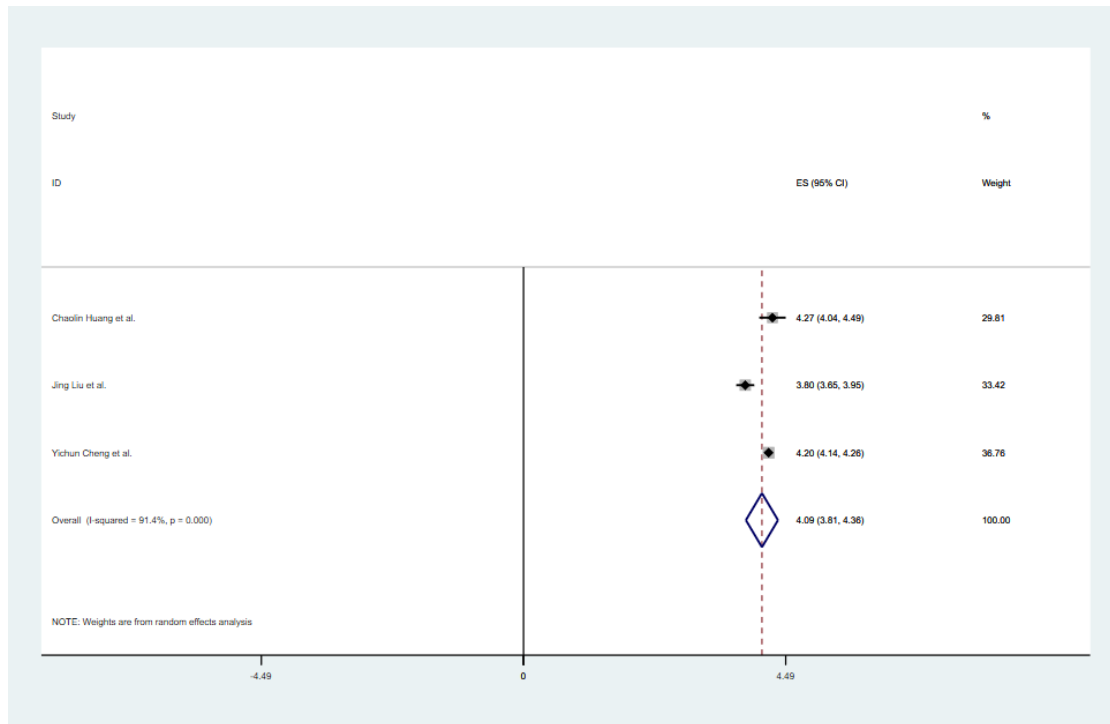

### C. Outside Wuhan

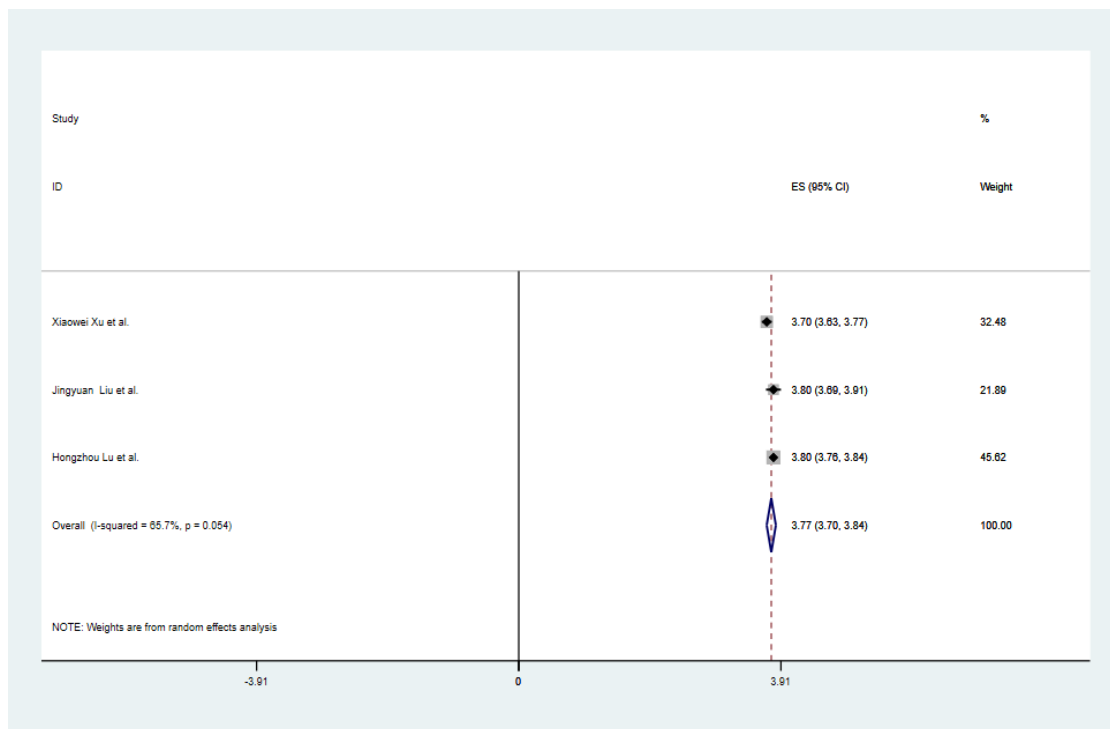

### D. Severe cases

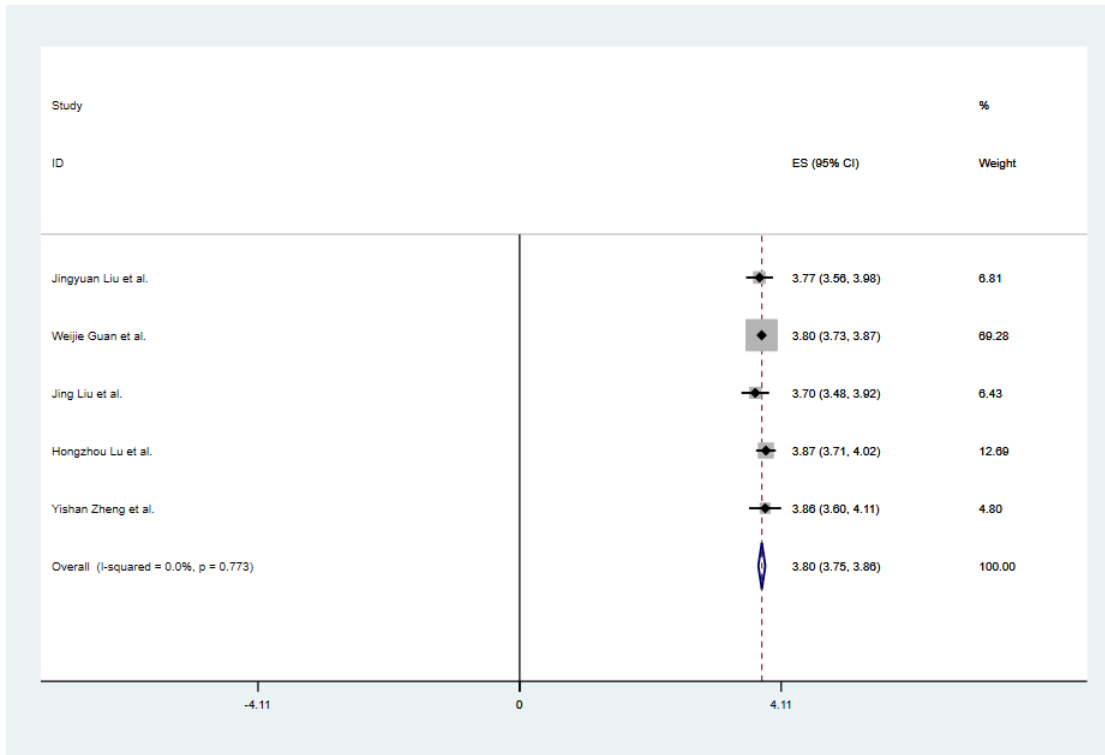

E. Non-severe cases

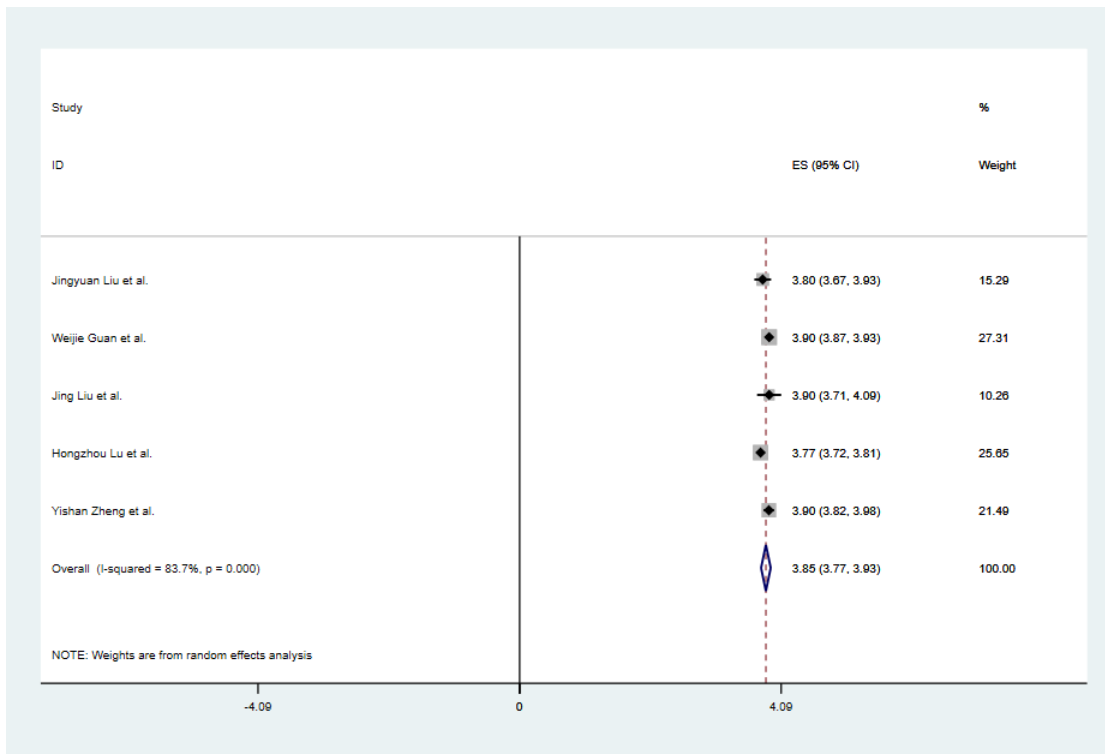

**eFigure 4. 20. Forest plot of PT, prothrombin time.**

A. Overall

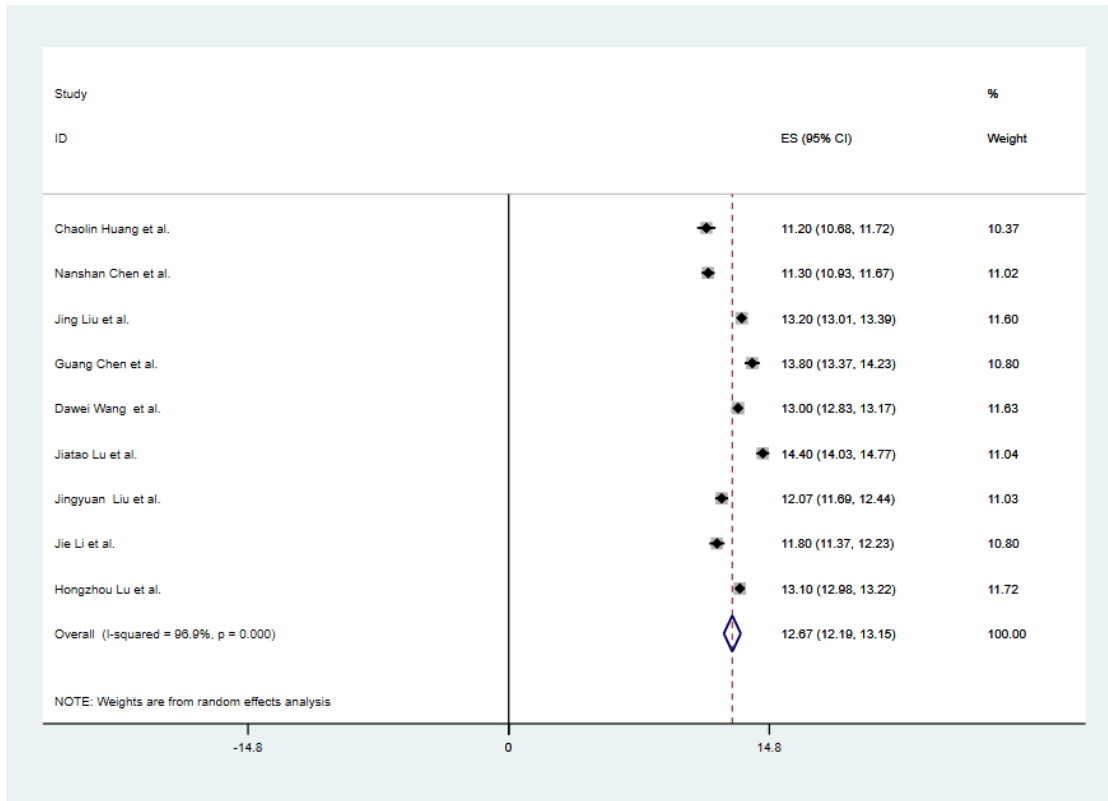

## B. Wuhan

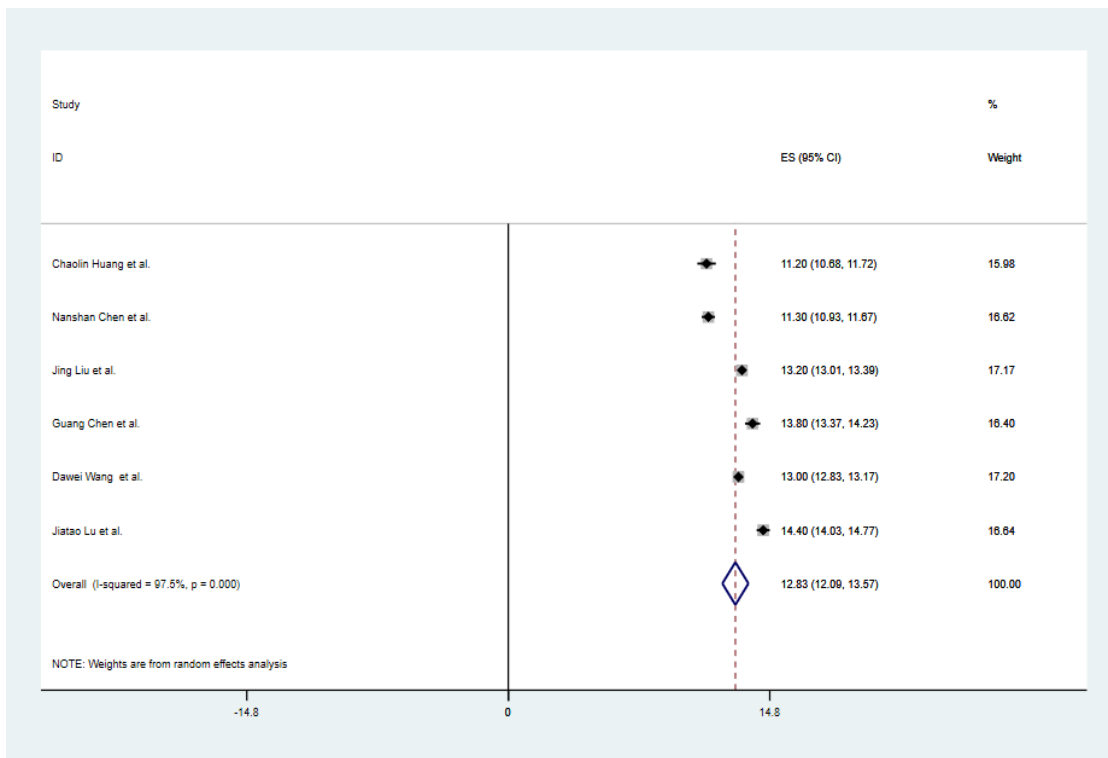

## C. Outside Wuhan

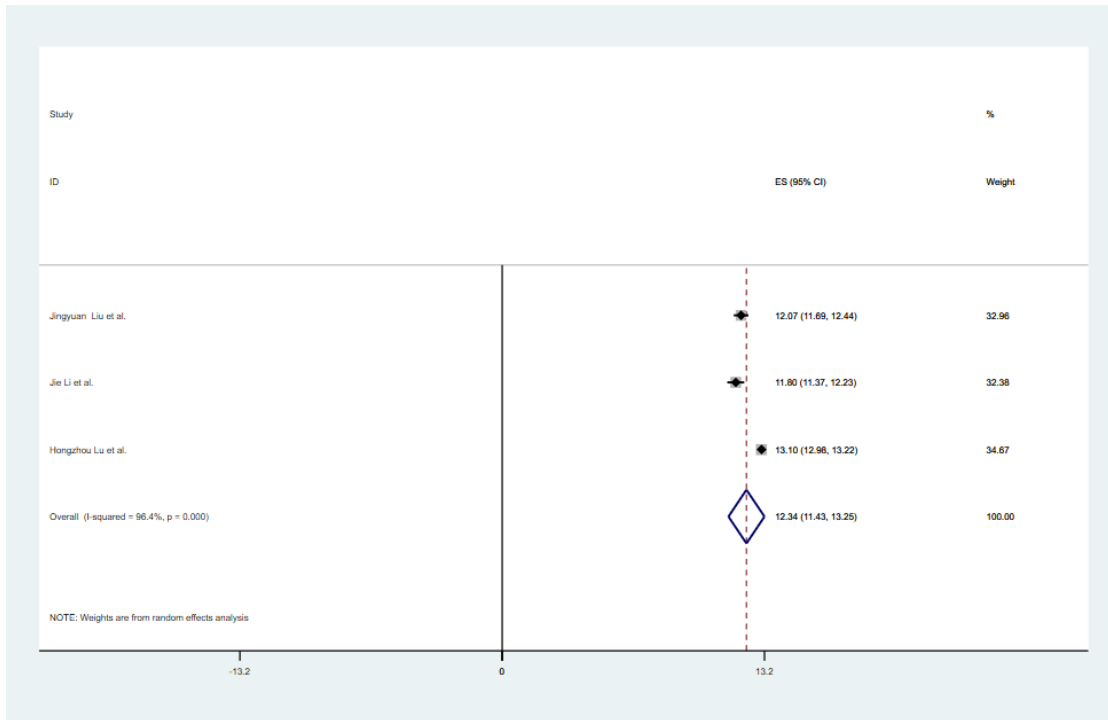

#### D. Severe cases

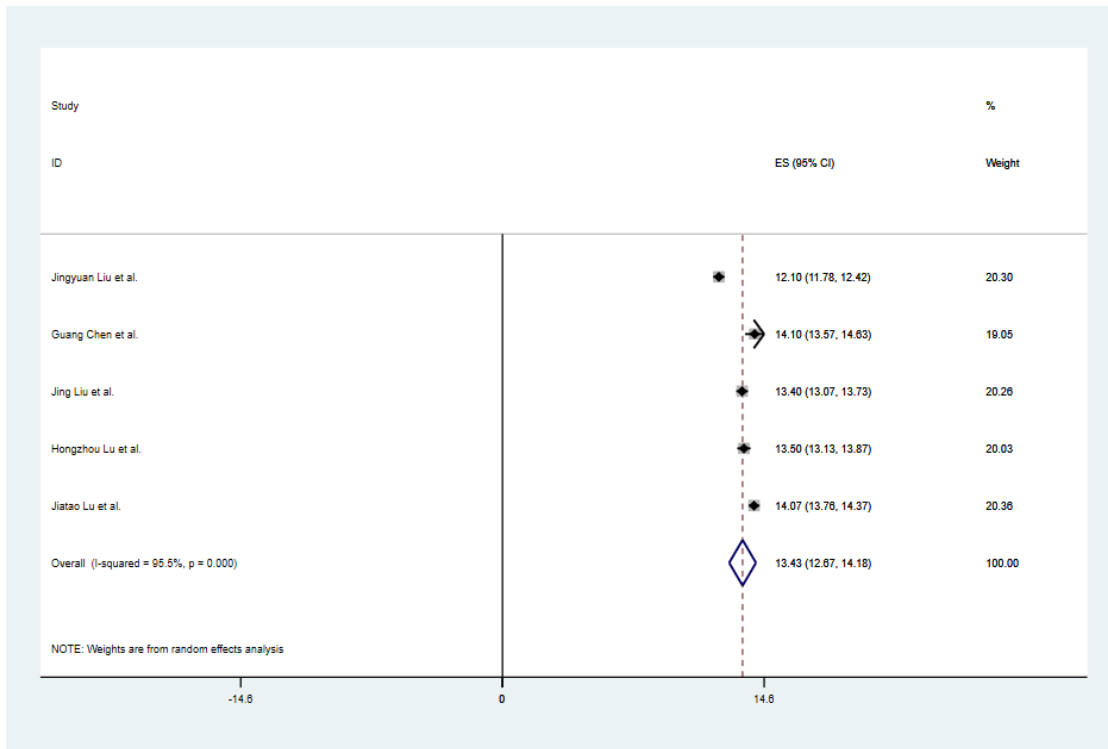

#### E. Non-severe cases

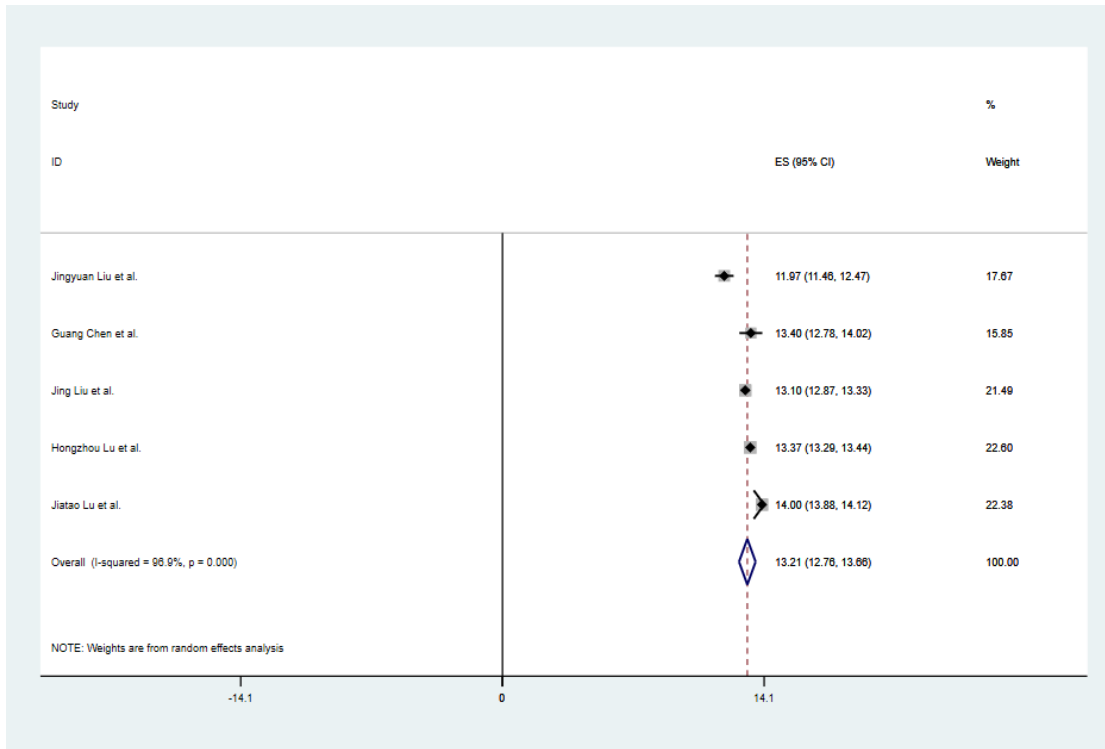

**eFigure 4. 22. Forest plot of Sodium**

**A. Overall**

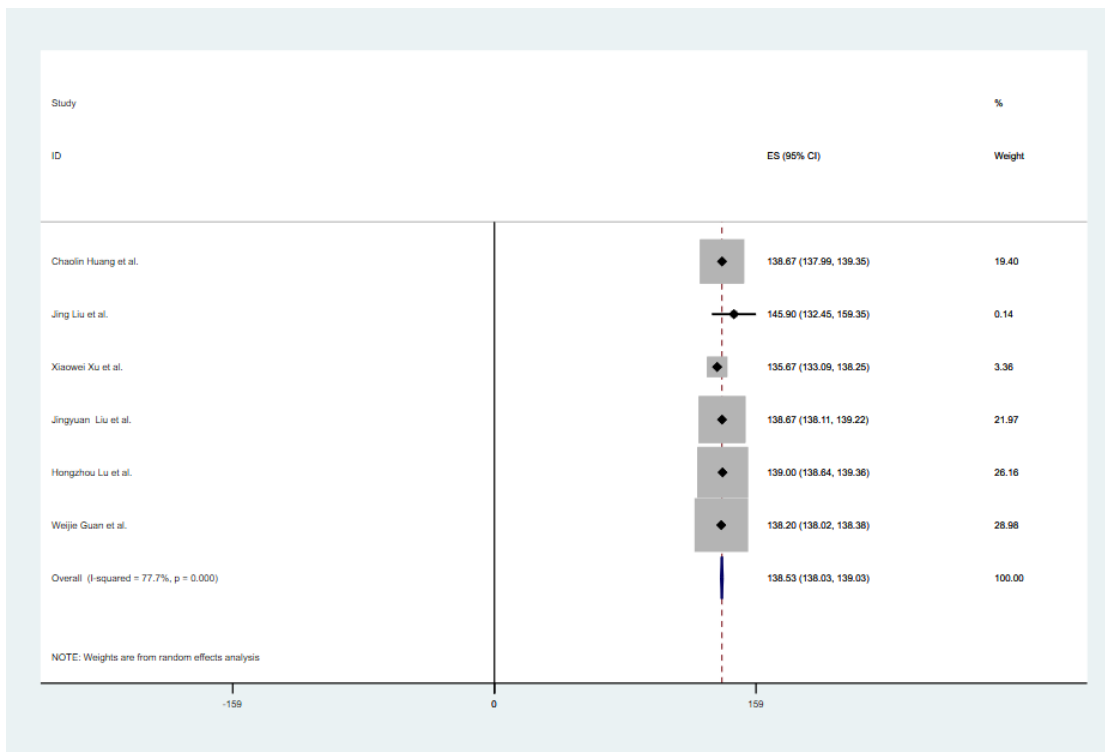

**B. Wuhan**



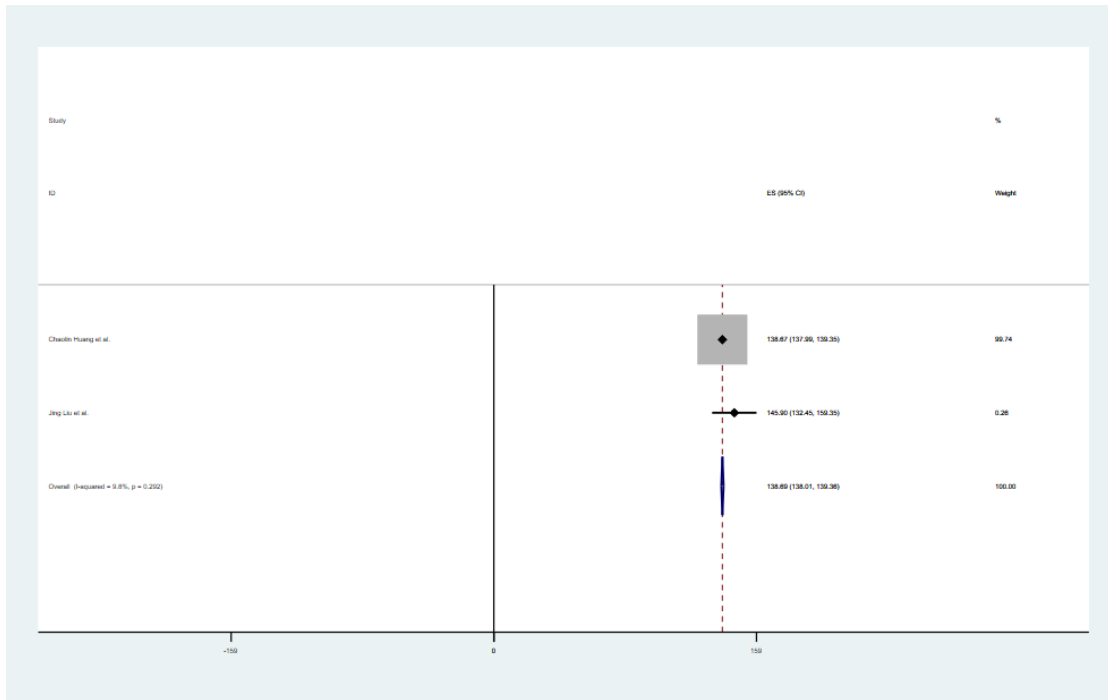

### C. Outside Wuhan

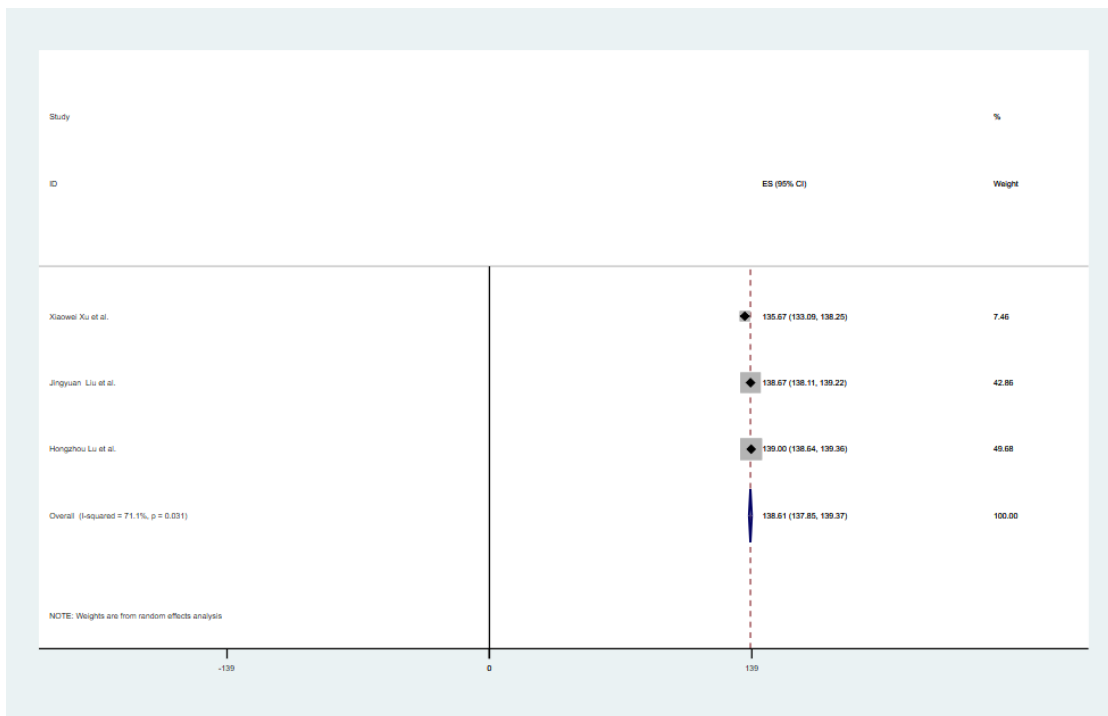

### D. Severe cases

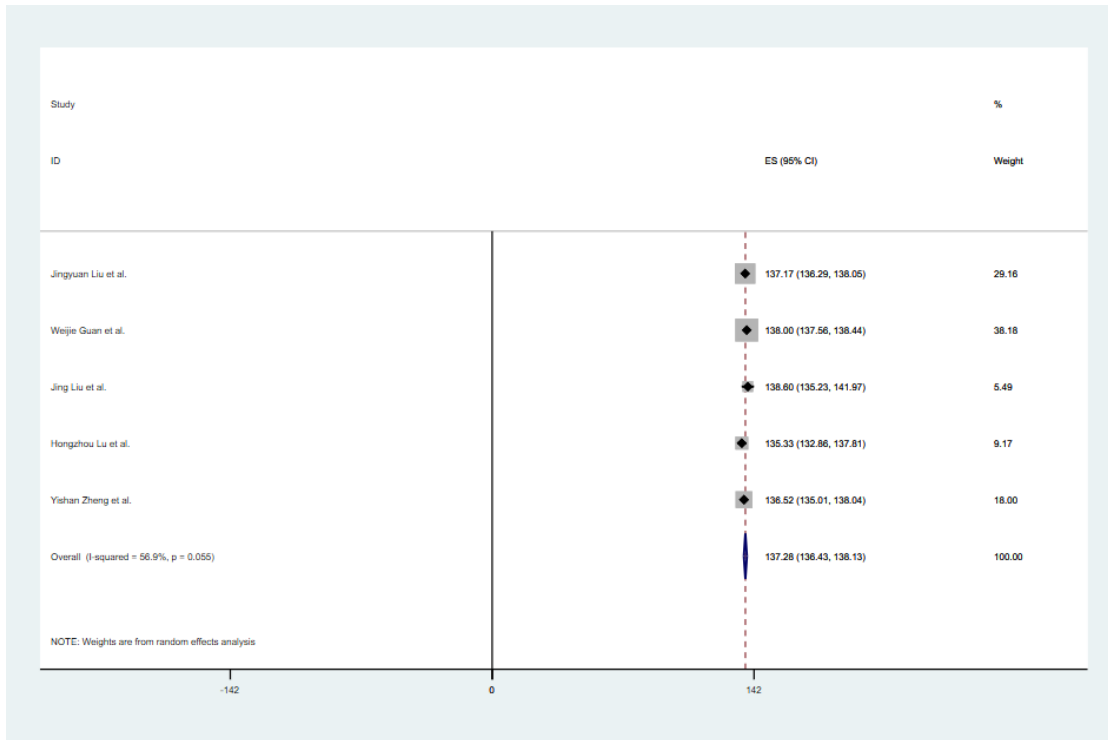

E. Non-severe cases

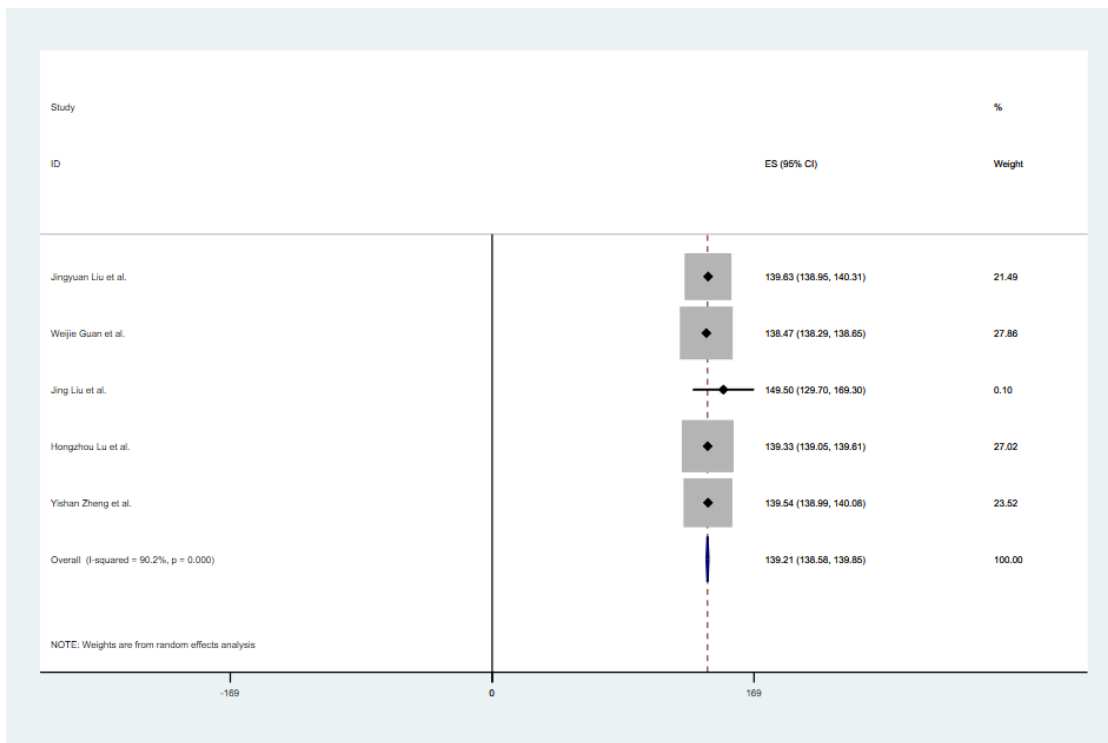

eFigure 4. 23. Forest plot of APTT, activated partial thromboplastin time.

A. Overall

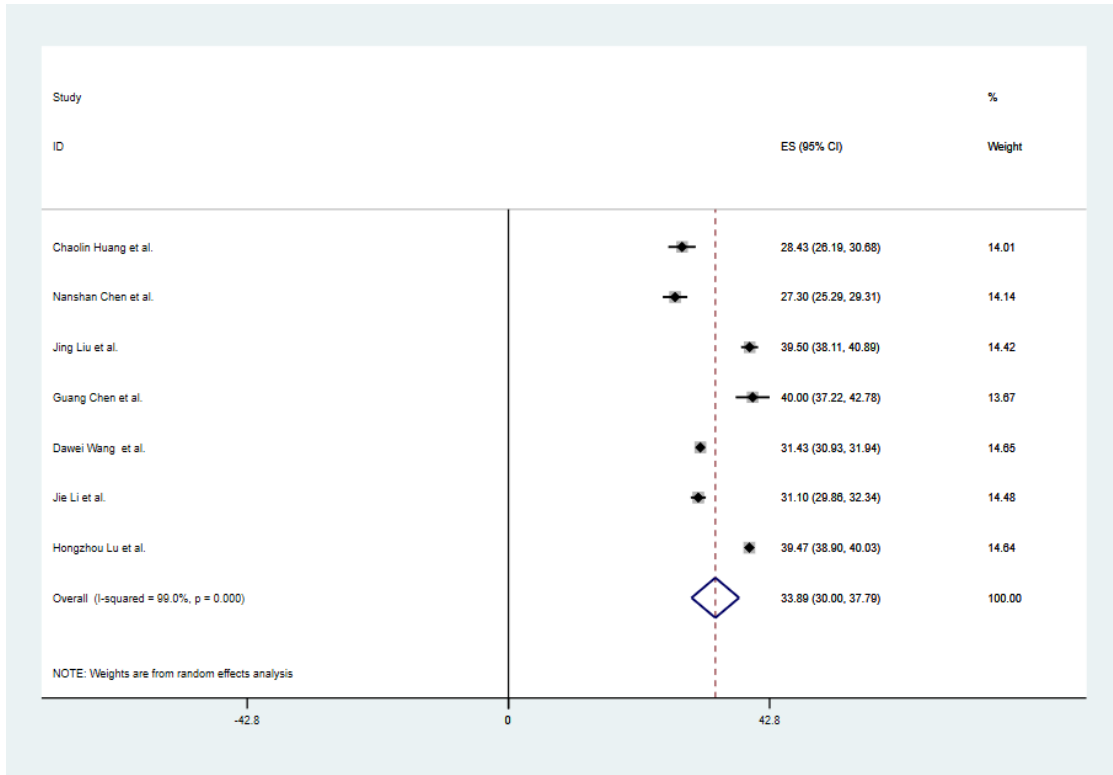

### B. Wuhan

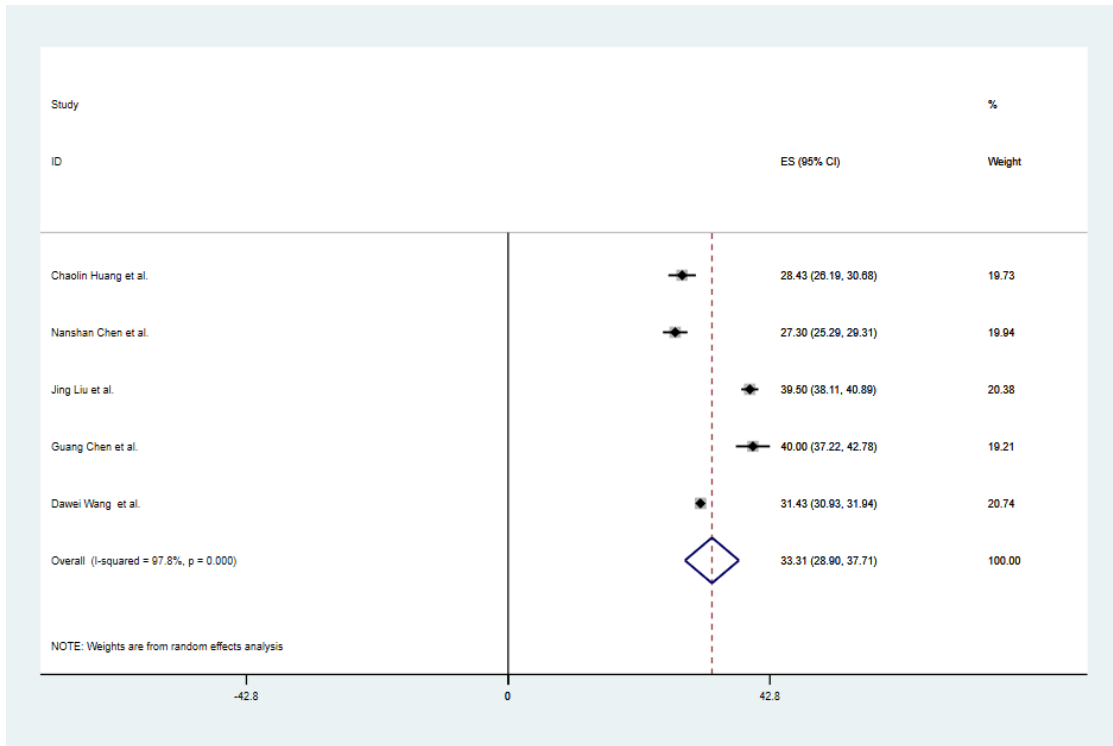

### C. Outside Wuhan

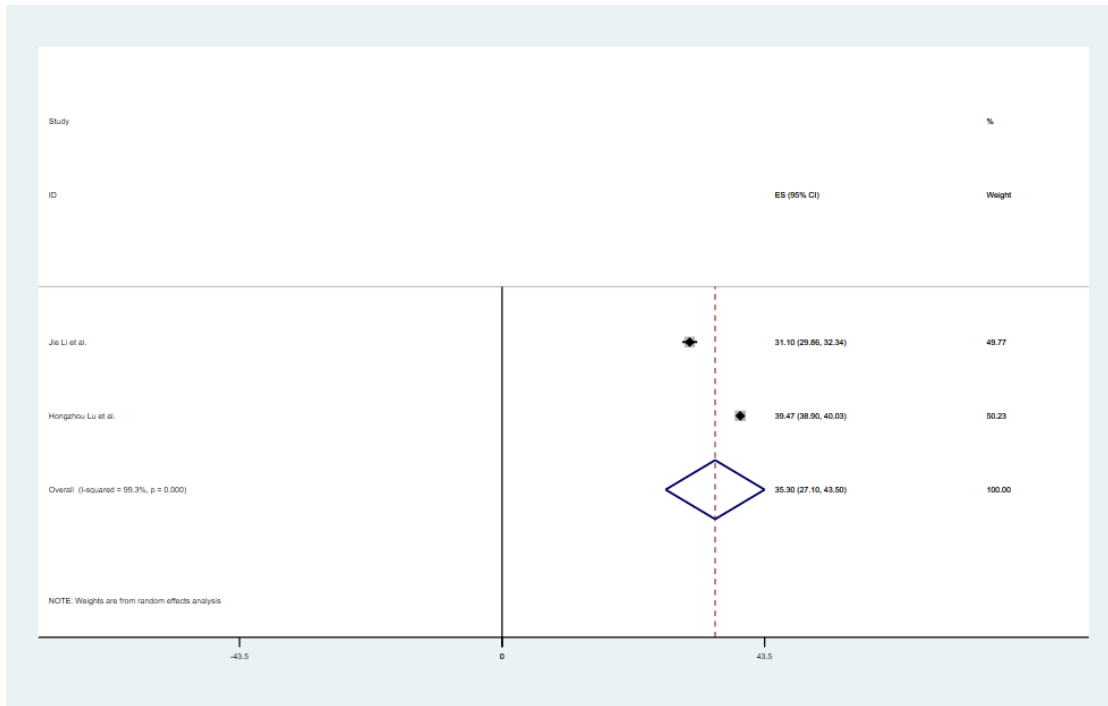

#### D. Severe cases

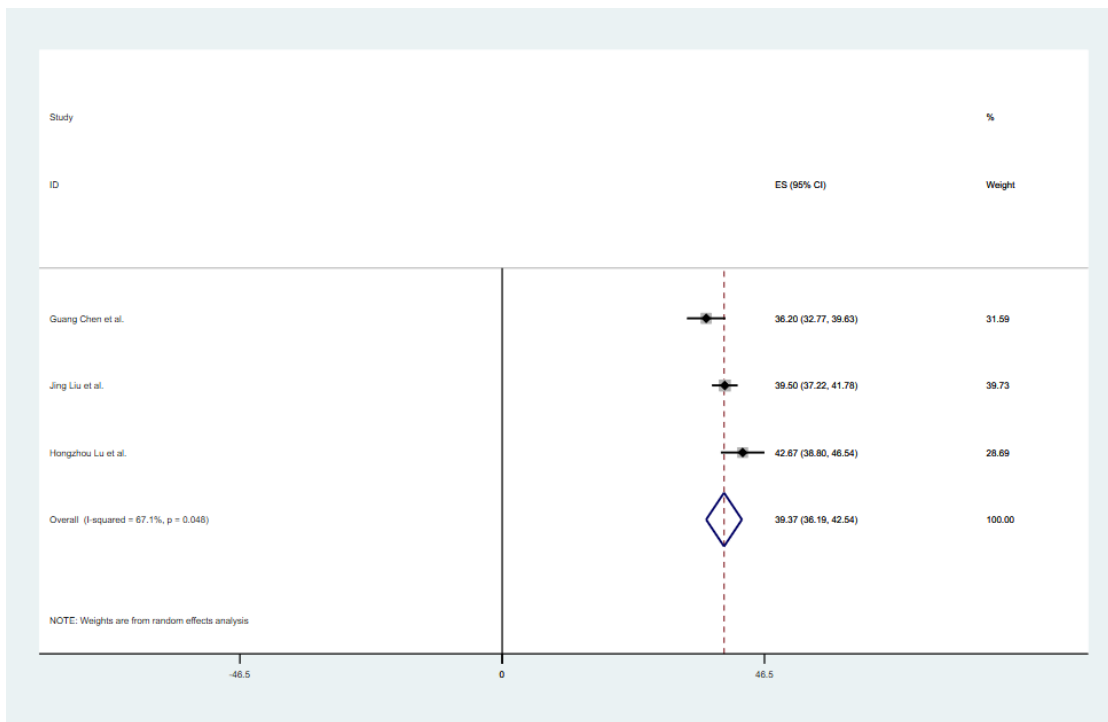

#### E. Non-severe cases

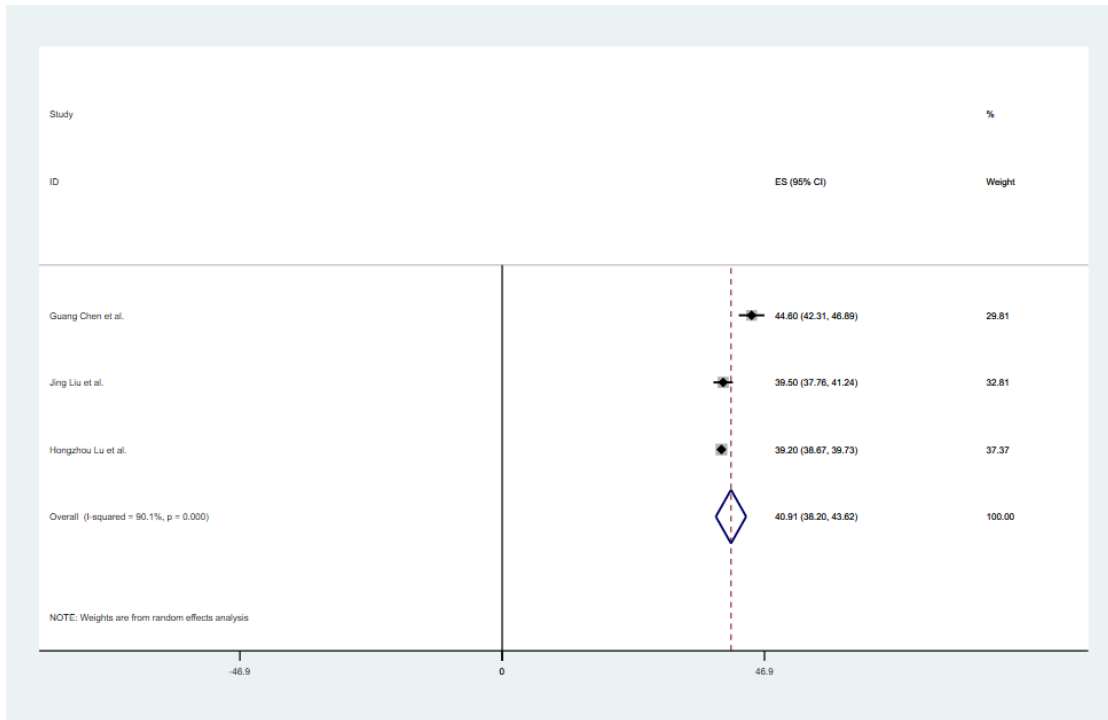

**eFigure 4. 24. Forest plot of D-dimer.**

**A. Overall**

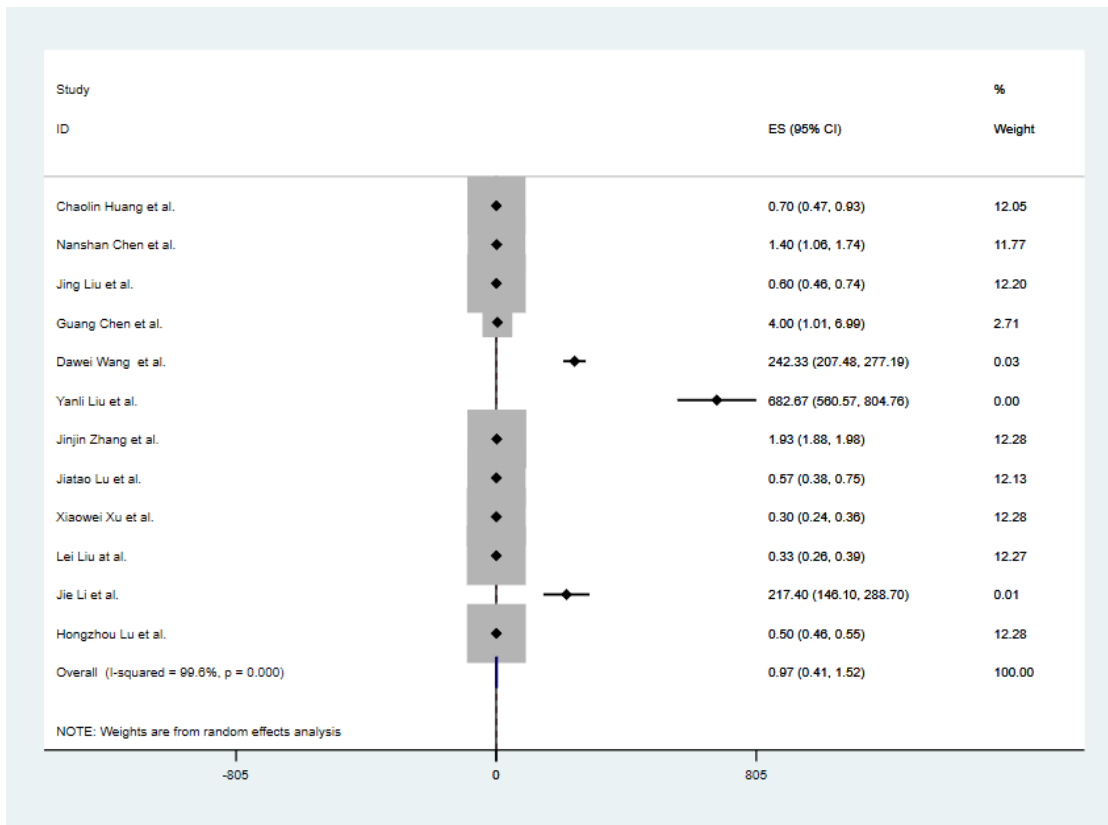

**B. Wuhan**

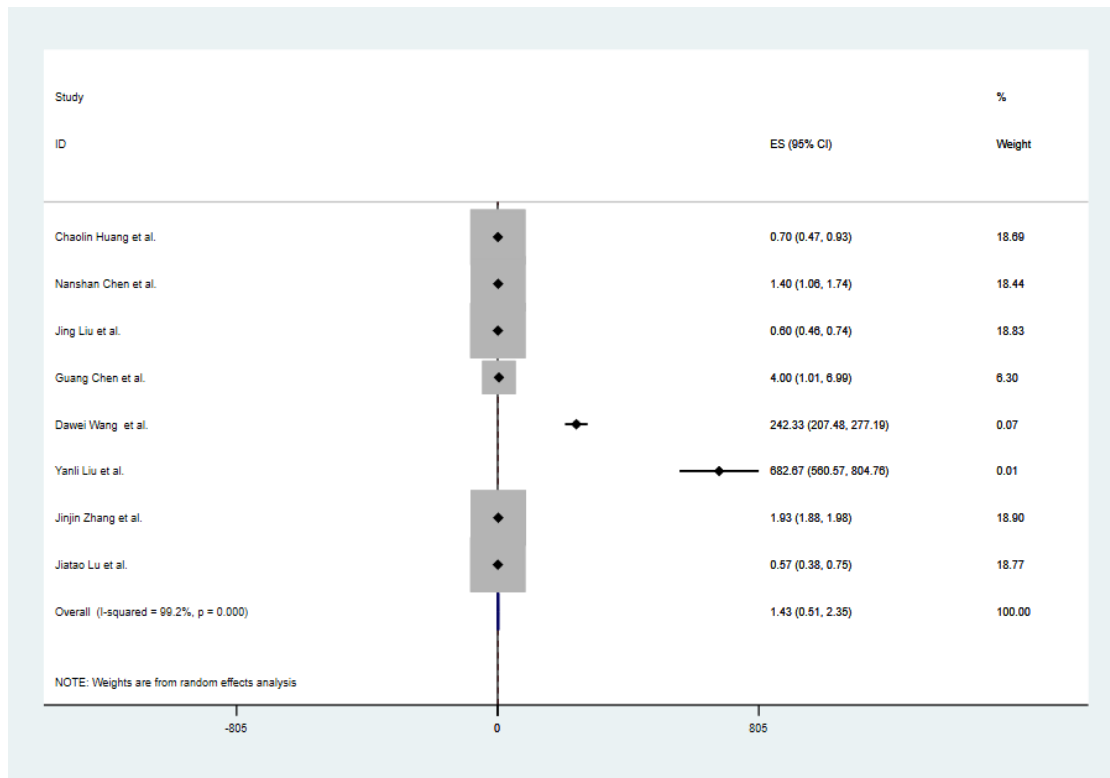

### C. Outside Wuhan

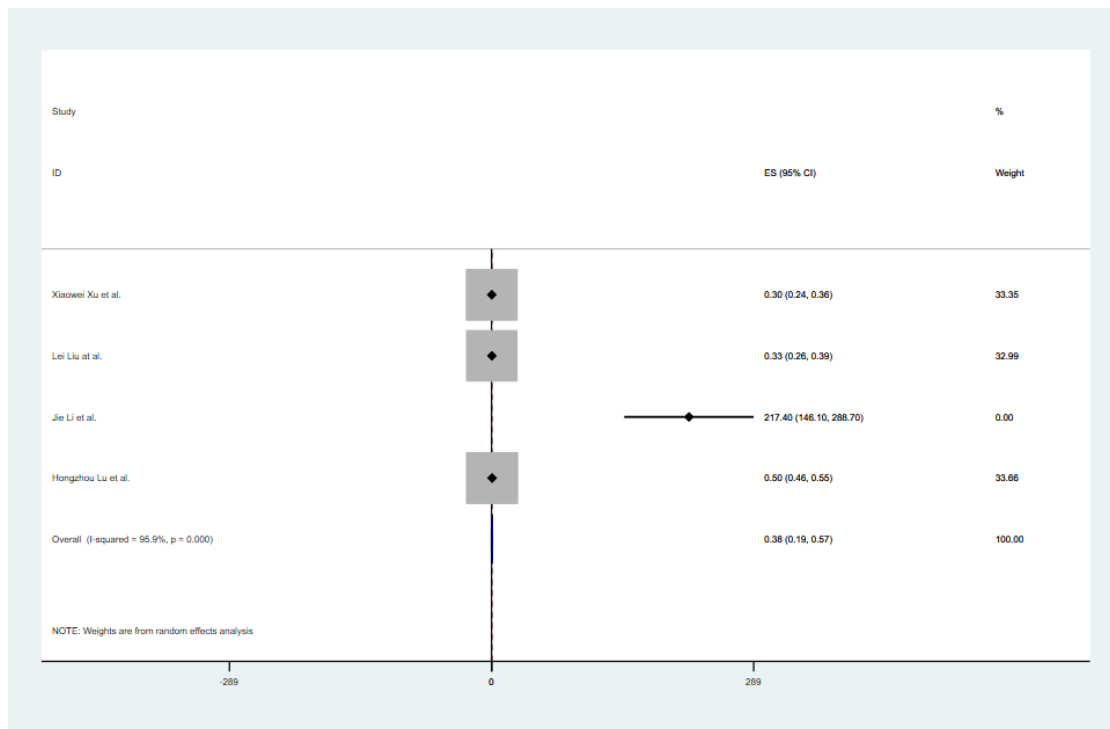

### D. Severe cases

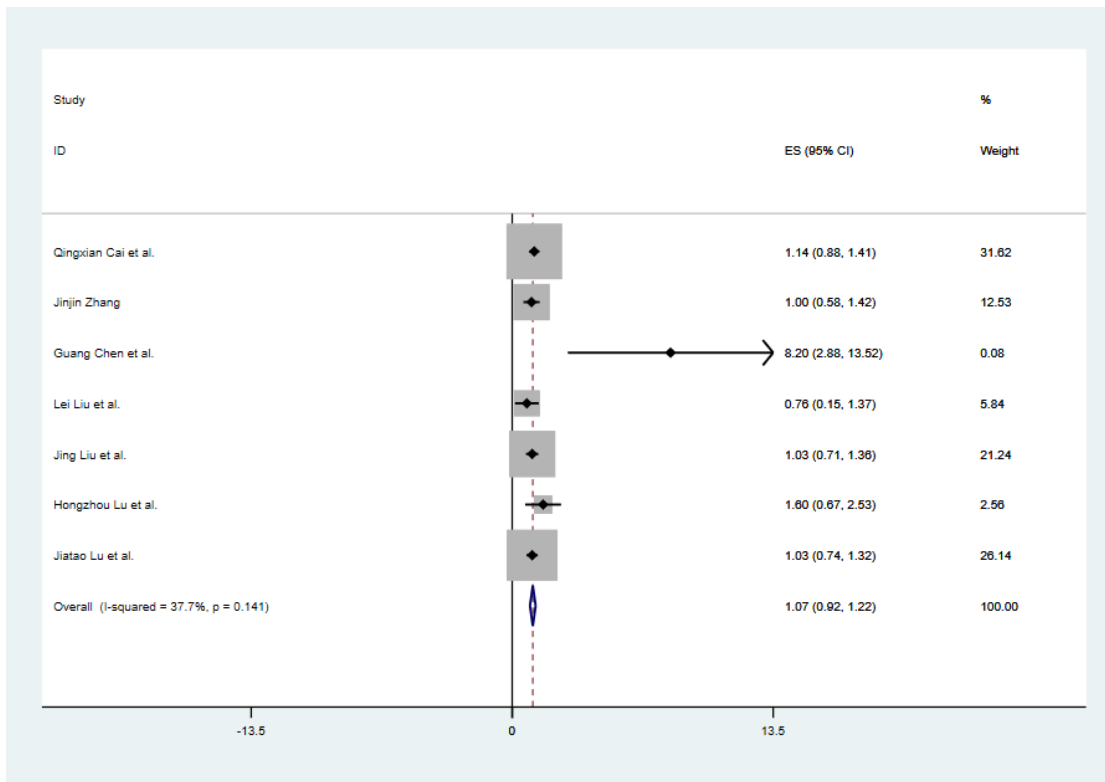

E. Non-severe cases

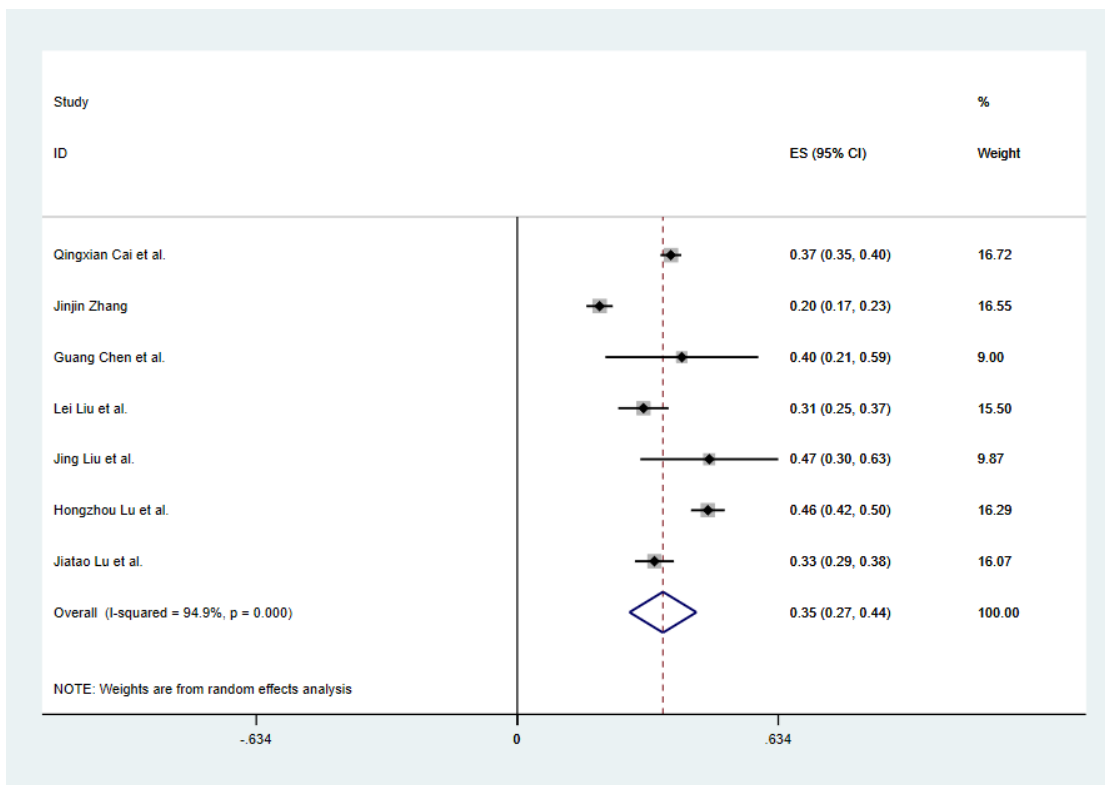

eFigure 4. 25. Forest plot of SF, serum ferritin.

A. Overall

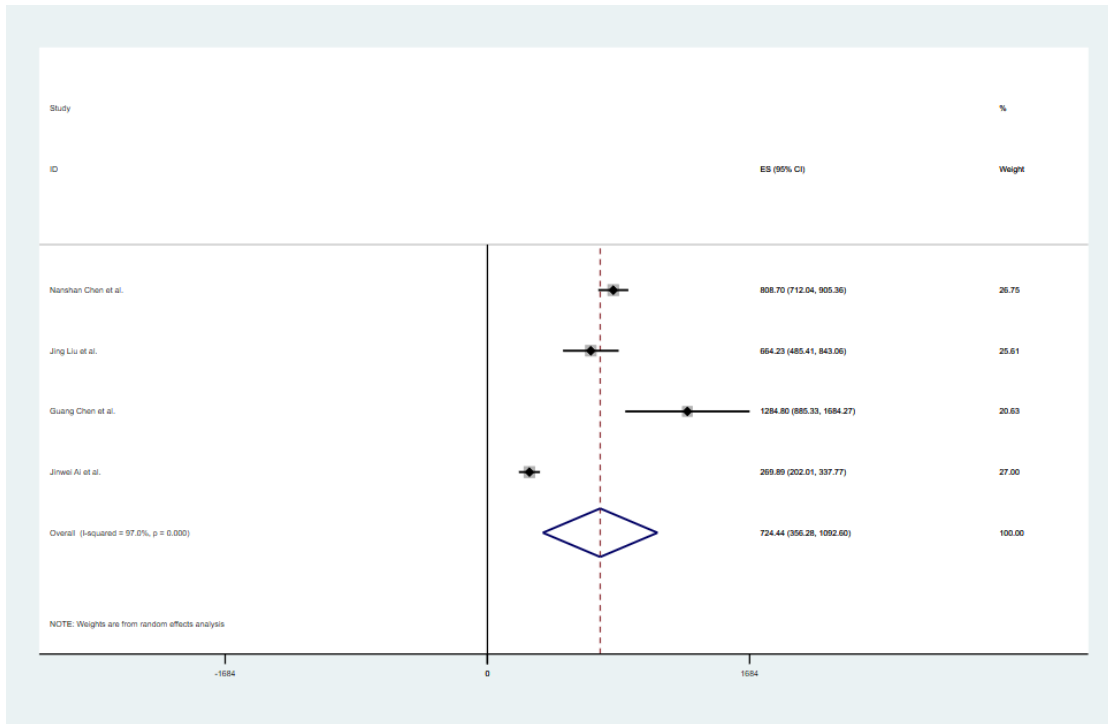

## B. Wuhan

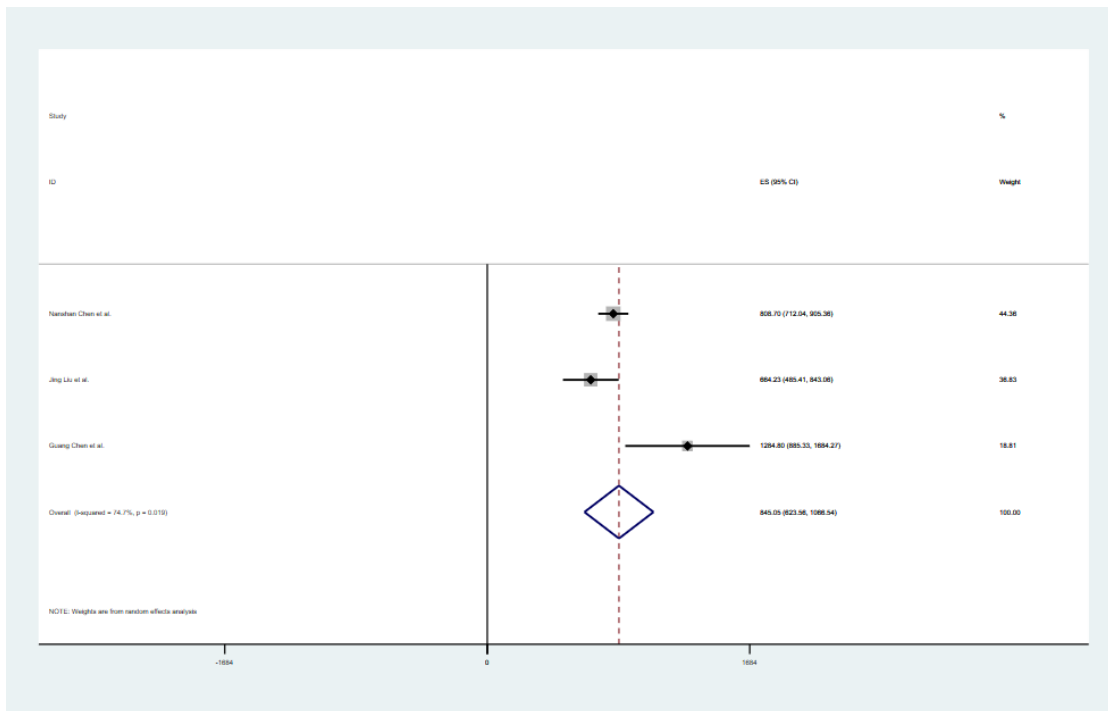

## C. Severe cases



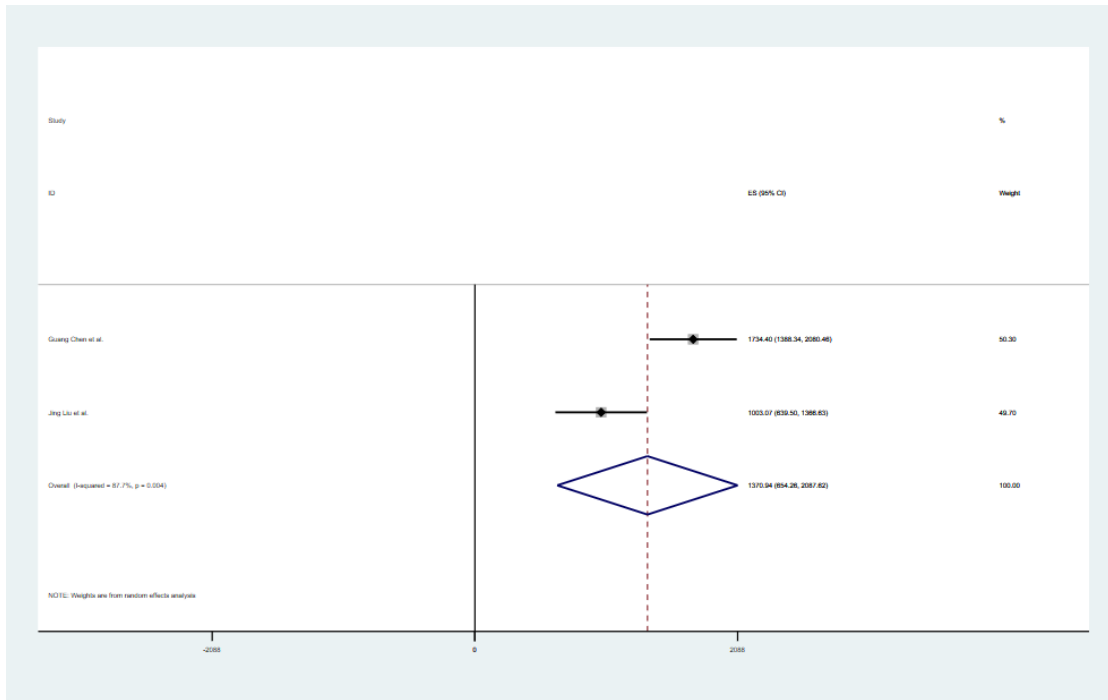

#### D. Non-severe cases

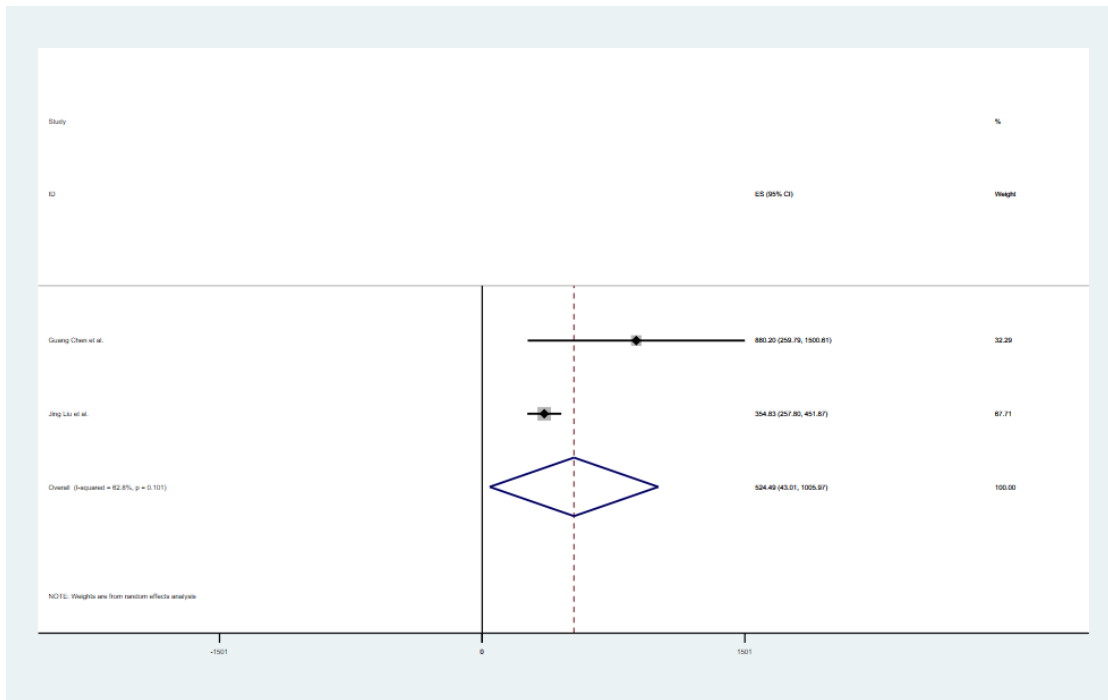

**eFigure 5. Estimated risk of medical conditions for severity of COVID-19 (A. Mean Difference [MD] in age between severe and non-severe cases).**

**A Age**

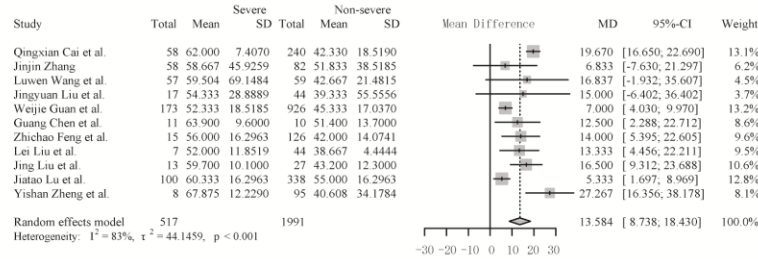

**C CVD**

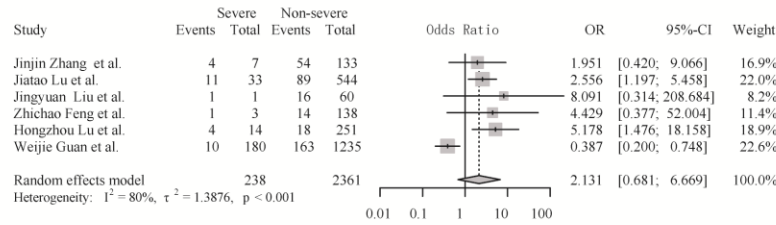

**E Hepatitis B infection**

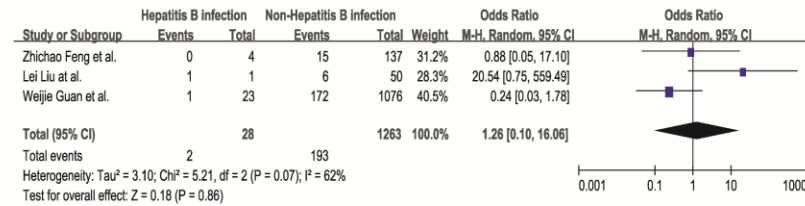

**B Smoking**

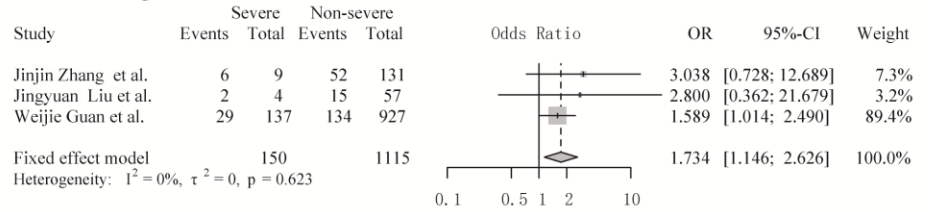

**D Cancer**

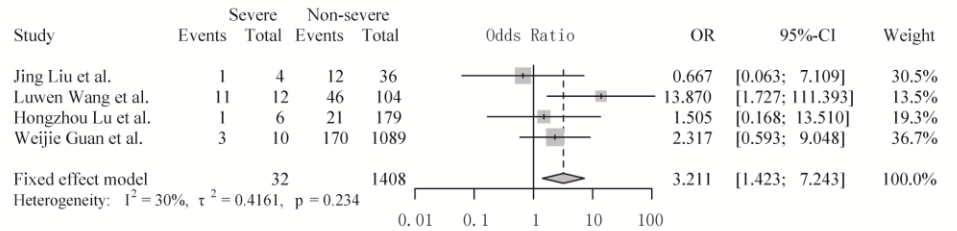

**F Bilateral lung involvement**

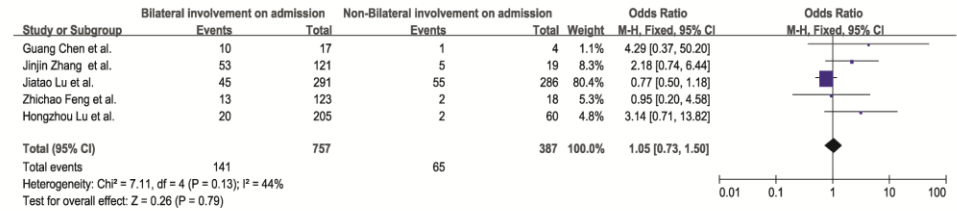

**Figure 6. Estimated risk of abnormal laboratory index for severity of COVID-19.**

**A High CK**

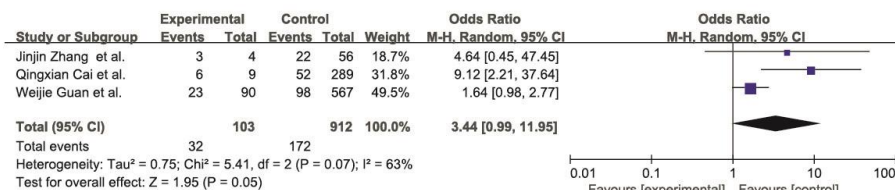

**B High CRP**

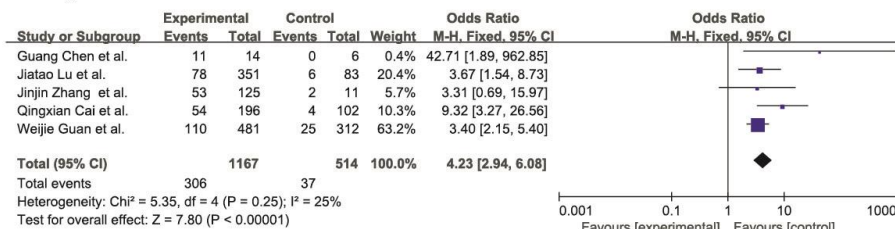

**C High D-dimer**

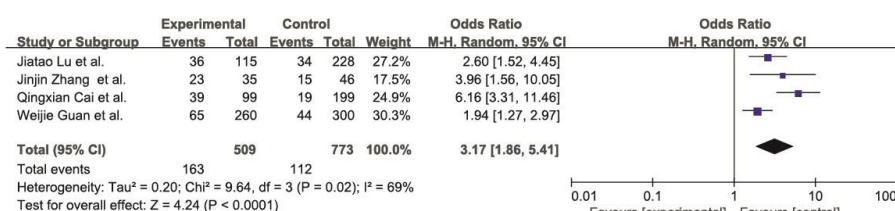

**D Lymphocytopenia**

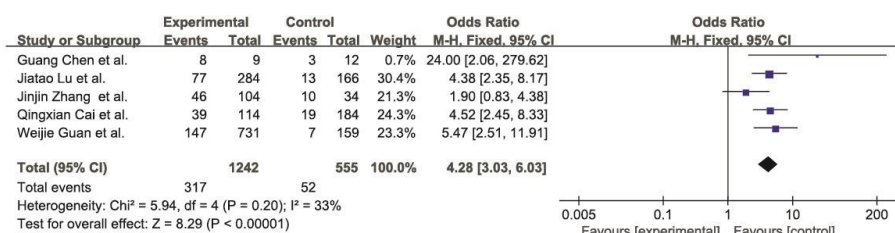

**E High LDH**

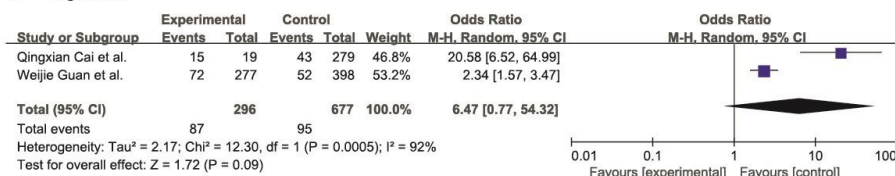

**F Thrombocytopenia**

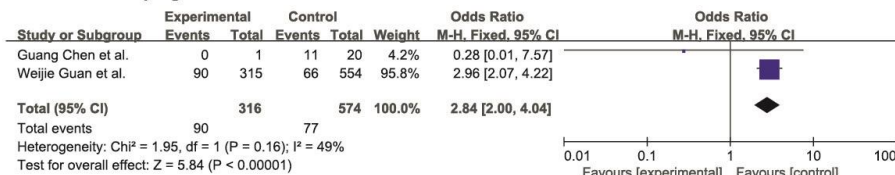

A, high CK, CK > 200 U/L; B, high CRP, CRP > 10mg/L; C, high D-dimer, D-dimer > 0.5mg/L; D, lymphocytopenia, lymphocyte count < 1.1 × 10<sup>9</sup>/L; E, high LDH, LDH > 250U/L; F, thrombocytopenia, PLT count < 150 × 10<sup>9</sup>/L

**eFigure 7. MD in laboratory index between severe and non-severe cases of COVID-19.**

**A ALB**

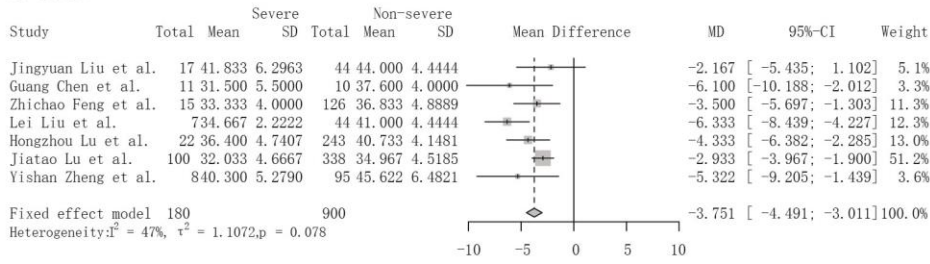

**B ALT**

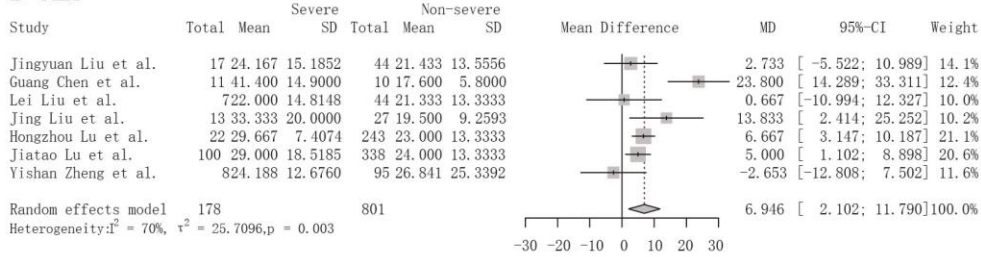

**C ESR**

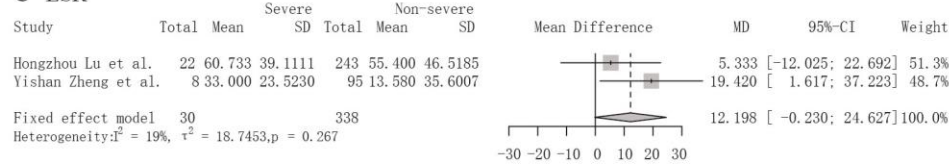

**D Scr**

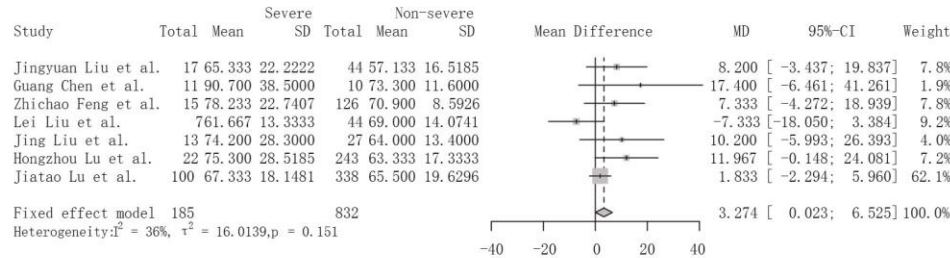

**E Sodium**

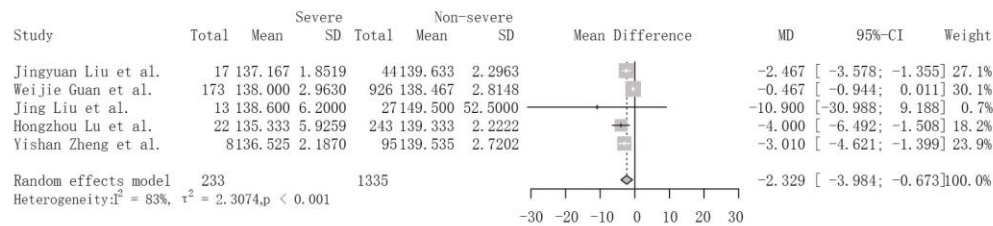

**eFigure 8. Forest plot showing result of sensitive analysis after excluding 1 study in turn.**

**A CSR**

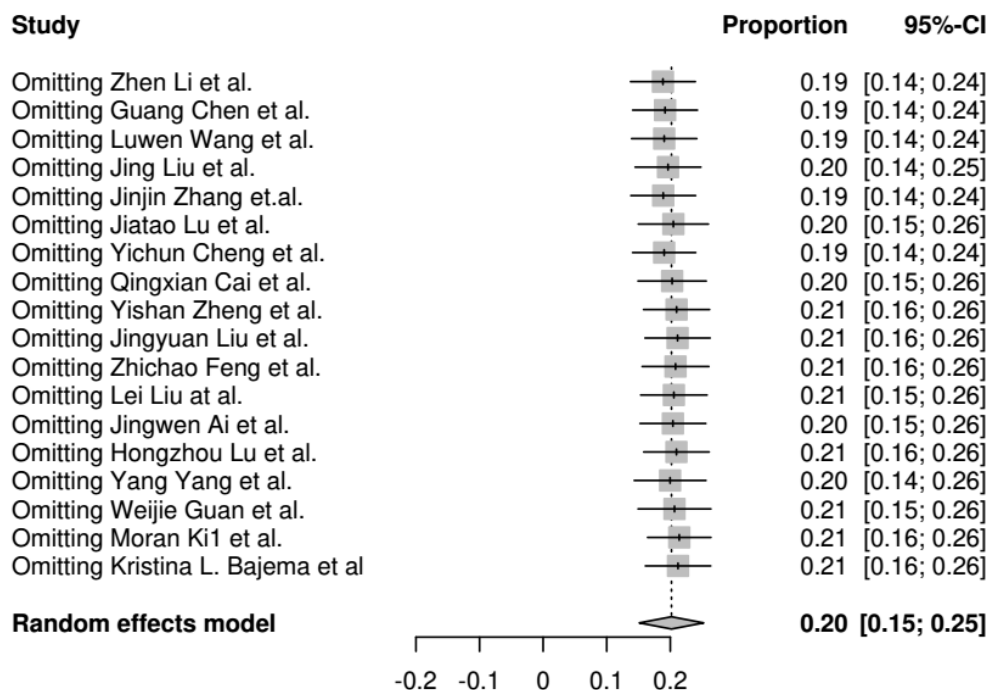

**B CFR**

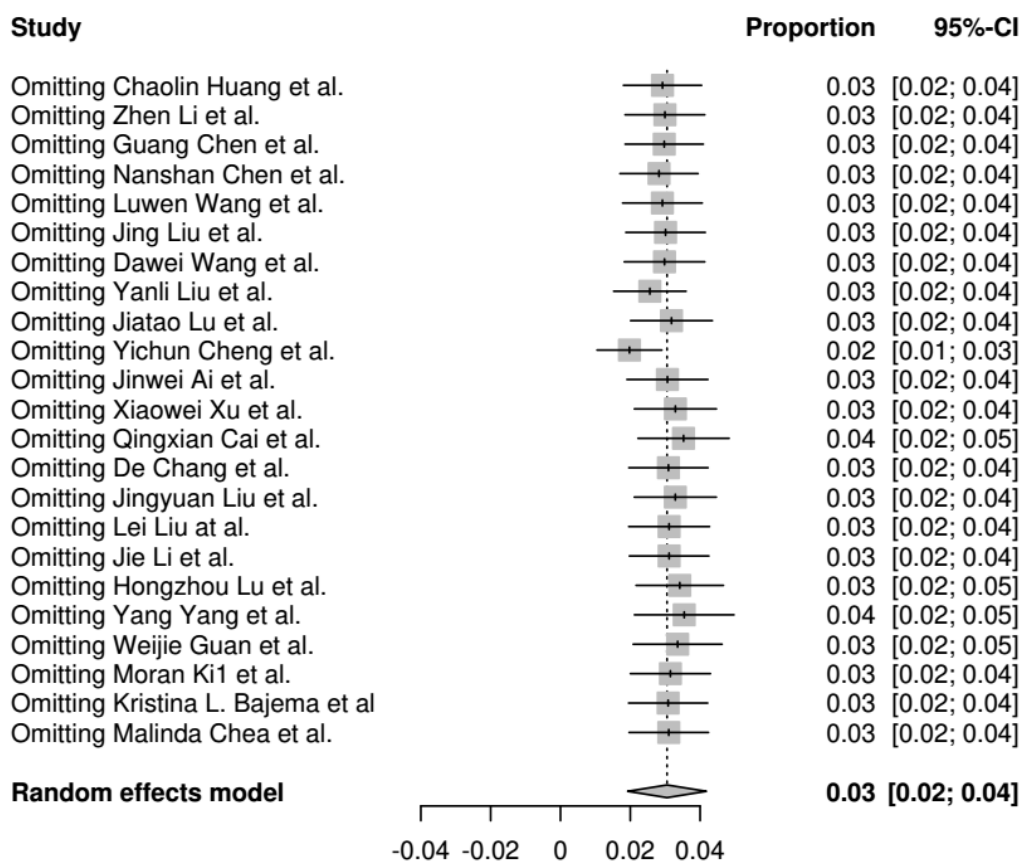

**eFigure 9. Funnel plot.**

A CSR

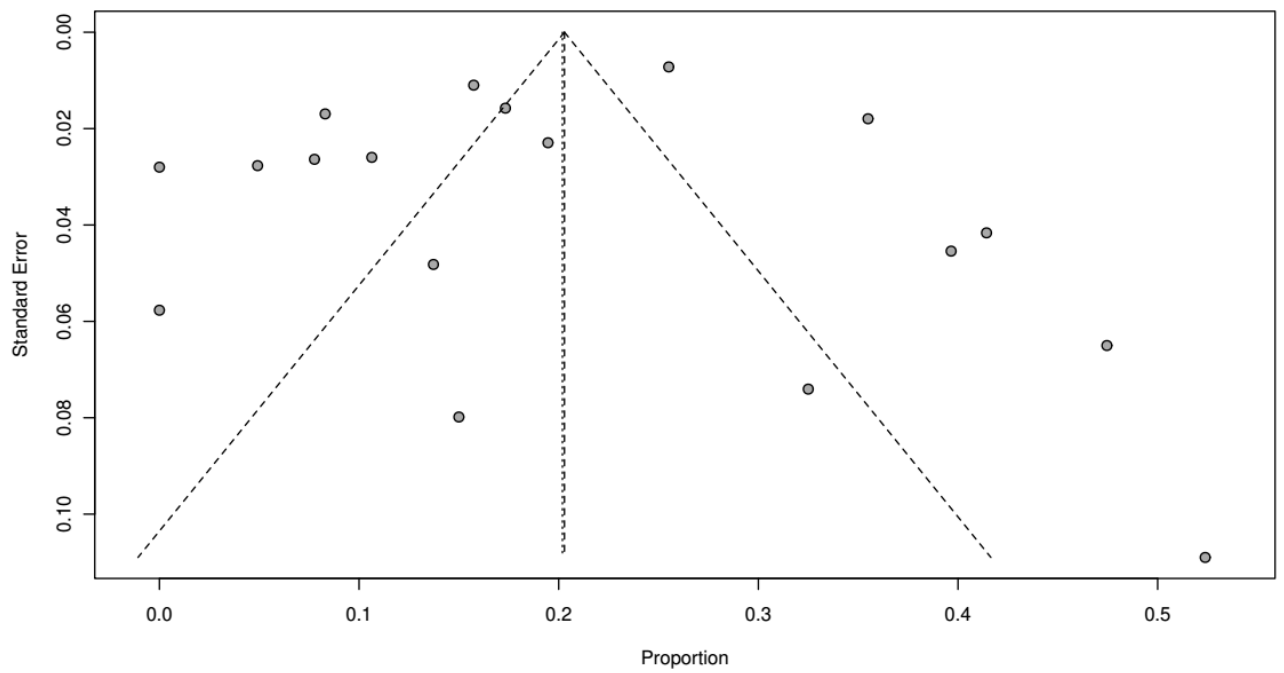

B CFR

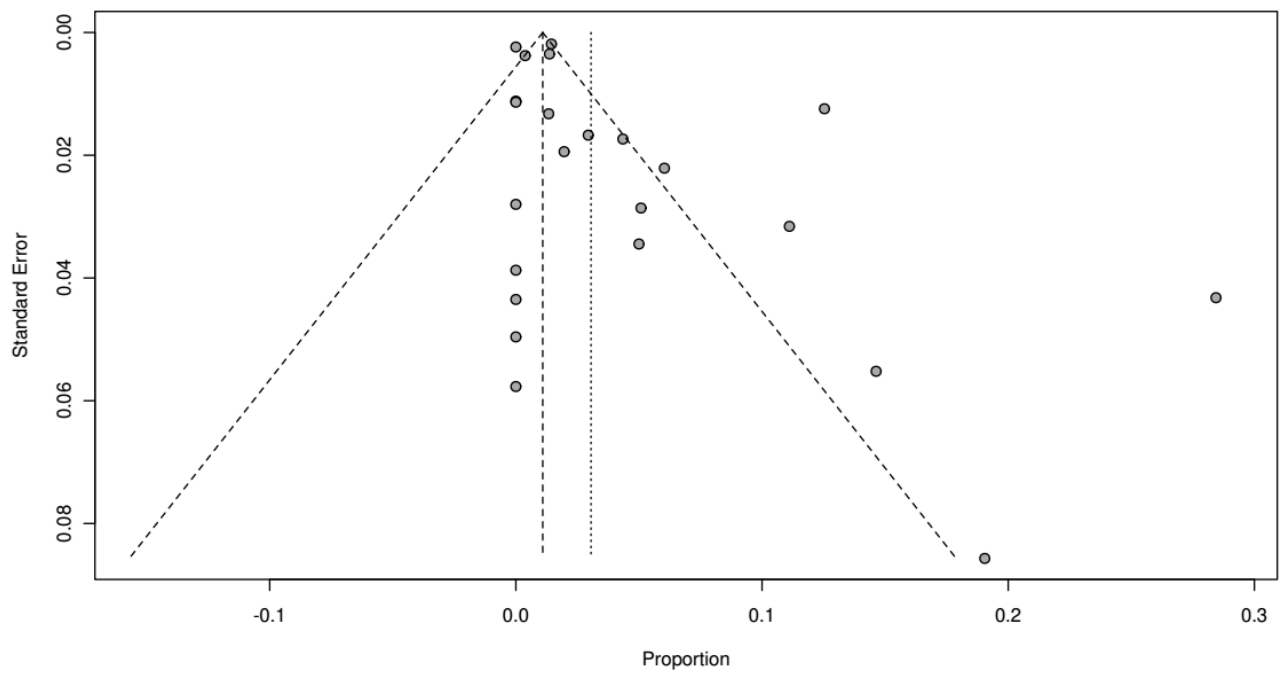

Center line represents the summary effect estimate. Outer dotted lines display 95% CIs.

Begger's test, Egger's test and Peter's test indicated no publication bias for both CSR and CFR

A (Begger:  $P = 0.73$ ; Peter:  $P = 0.32$ );

B (Begger:  $P = 0.16$ ; Peter:  $P = 0.10$ ).

## **eReferences.**

1. C H, Y W, X L, et al. Clinical features of patients infected with 2019 novel coronavirus in Wuhan, China. *Lancet (London, England)* 2020.
2. JP M, GW W, AC L, et al. Diagnosis and Treatment of Adults with Community-acquired Pneumonia. An Official Clinical Practice Guideline of the American Thoracic Society and Infectious Diseases Society of America. *American journal of respiratory and critical care medicine* 2019; **200**(7): e45-e67.
